# Supplementary material for: Organocatalytic asymmetric [3 + 3] annulations of 3-carboxamide oxindoles with β,γ-unsaturated α-keto esters: facile access to chiral spiro-δ-lactam oxindoles
Source: Royal Society of Chemistry journal article supplement (doi:10.1039/d2qo01423h), 2023-01-01
Supplement: d2qo01423h1.pdf [file d2qo01423h1.pdf]

## Supporting Information

### **Organocatalytic asymmetric [3+3] annulations of 3-carboxamide oxindoles with $\beta,\gamma$ -unsaturated $\alpha$ -keto esters: facile access to chiral spiro- $\delta$ -lactam oxindoles**

Zheng-Bing Zhang\*<sup>§</sup>, Qiuzuo He<sup>§</sup>, Ting Wang, Guoqin Wang, Dan Yang\*, Pan Han and Linhai Jing\*

Chemical Synthesis and Pollution Control Key Laboratory of Sichuan Province, China West Normal University, Nanchong 637002, P. R. China. E-mail: zhangzhengbing@cwnu.edu.cn; danyang@cwnu.edu.cn; jlhxg@cwnu.edu.cn

<sup>§</sup>These authors contributed equally to this work.

# Table of Contents

|                                                                    |     |
|--------------------------------------------------------------------|-----|
| 1. General information .....                                       | S2  |
| 2. Preparation of new squaramide catalyst <b>C7</b> .....          | S3  |
| 3. Preparation of substrates <b>1l</b> and <b>1m</b> .....         | S4  |
| 4. Reaction optimization .....                                     | S6  |
| 5. Chiral squaramide-catalyzed asymmetric [3+3] annulation .....   | S8  |
| 6. Scale-up and transformation of product <b>3</b> .....           | S20 |
| 7. X-ray structures of <b>1c</b> , <b>3ca</b> and <b>3cf</b> ..... | S23 |
| 8. References .....                                                | S28 |
| 9. NMR spectra .....                                               | S29 |
| 10. HPLC spectra .....                                             | S56 |

## 1. General information

Unless otherwise indicated, all reactions were carried out under an argon atmosphere using standard Schlenk-Lines. Column chromatography was performed on silica gel (200–300 mesh) eluting with ethyl acetate and petroleum ether.  $^1\text{H}$  NMR spectra were recorded at 400 MHz and  $^{13}\text{C}$  NMR spectra were recorded at 100 MHz (Bruker Avance II 400) with  $\text{CDCl}_3$  or  $\text{DMSO-}d_6$  as solvents. Chemical shifts are reported in parts per million (ppm) down field from TMS with the solvent resonance as the internal standard. Coupling constants ( $J$ ) are reported in Hz and refer to apparent peak multiplications. HRMS was recorded on a Bruker micrOTOF-Q II mass spectrometer and a Waters UPLC-QTOT-MS (Xevo G2-XS). Enantiomeric excess ( $ee$ ) were determined by HPLC analysis on a Shimadzu LC-20A. Optical rotation data were examined in  $\text{CH}_2\text{Cl}_2$  solution at 25 °C.

All solvents were purified by using standard methods prior to use. 3-Carboxamide oxindoles **1a-1k** were prepared by previously reported method.<sup>[1]</sup>  $\beta,\gamma$ -Unsaturated  $\alpha$ -keto esters **2** were prepared according to the reported procedure.<sup>[2]</sup> Catalysts **C1**, **C2**, **C4** and **C12-C14** were purchased from commercial sources. Thiourea catalysts **C3** and **C9-C11** were prepared according to the method reported in the literature.<sup>[3]</sup> Squaramide catalysts **C5**, **C6**, **C8** and **C15-C18** were prepared according to the method previously described.<sup>[4]</sup> All other reagents were purchased from commercial sources and used without further purification.

## 2. Preparation of new squaramide catalyst **C7**

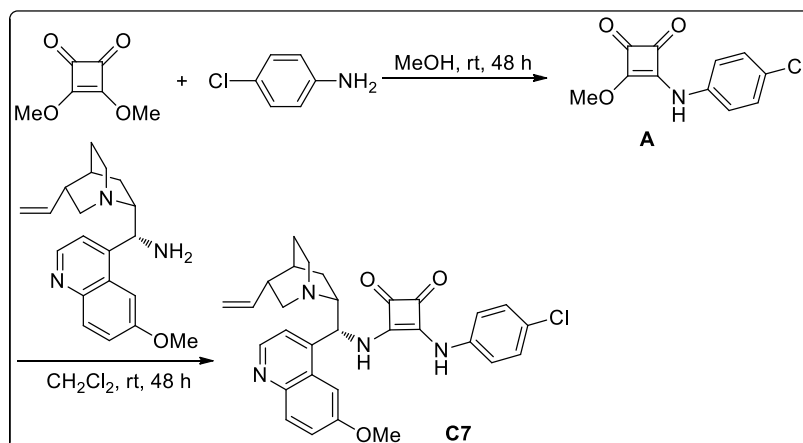

To a solution of 3,4-dimethoxycyclobut-3-ene-1,2-dione (213.2 mg, 1.5 mmol) in MeOH (5 mL) was added *p*-chloroaniline (190.5 mg, 1.5 mmol) in MeOH (2 mL). The reaction mixture was stirred at room temperature for 48 h and then concentrated in vacuo to afford the intermediate **A** as a solid without further purification. To a solution of **A** (71.1 mg, 0.3 mmol) in CH<sub>2</sub>Cl<sub>2</sub> (4 mL) was added a solution of quinidine amine (106.7 mg, 0.33 mmol) in CH<sub>2</sub>Cl<sub>2</sub> (1 mL). After 48 h, the reaction mixture was concentrated and the residue was subjected to flash chromatograph (DCM/MeOH 20:1) on silica gel to afford the corresponding squaramide catalyst **C7**.

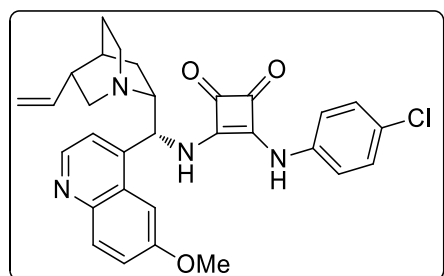

**3-((4-chlorophenyl)amino)-4-(((*R*)-(6-methoxyquinolin-4-yl)((*1S,2R,4S,5R*)-5-vinylquinuclidin-2-yl)methyl)amino)cyclobut-3-ene-1,2-dione (**C7**):** The desired catalyst was obtained as a white solid (96.8 mg, 61% yield);  $[\alpha]_{\text{D}}^{25} = +0.726$  (c 0.01, CH<sub>2</sub>Cl<sub>2</sub>); **<sup>1</sup>H NMR (400**

**MHz, DMSO-*d*<sub>6</sub>)** δ 9.74 (s, 1H), 8.83 (s, 1H), 8.17 (s, 1H), 7.98 (d, *J* = 9.2 Hz, 1H), 7.76-7.67 (m, 2H), 7.46-7.34 (m, 5H), 6.11-5.82 (m, 2H), 5.21 (d, *J* = 17.6 Hz, 1H), 5.09 (d, *J* = 10.8 Hz, 1H), 3.95 (s, 3H), 3.20-3.14 (m, 1H), 3.00-2.78 (m, 4H), 2.26-2.22 (m, 1H), 1.57-1.48 (m, 3H), 1.13-1.07 (m, 1H), 0.92-0.83 (m, 1H). **<sup>13</sup>C NMR (100 MHz, DMSO-*d*<sub>6</sub>)** δ 184.66, 180.25, 168.70, 163.61, 158.35, 148.21, 144.75, 143.74, 141.25, 138.21, 131.97, 129.60, 127.94, 127.13, 122.56, 120.24, 119.91, 114.89, 101.64, 59.26, 56.07, 56.00, 49.45, 46.09, 38.97, 27.68, 26.63, 25.69. **HRMS *m/z* (ESI):** calcd for C<sub>30</sub>H<sub>30</sub>ClN<sub>4</sub>O<sub>3</sub><sup>+</sup> [M+H]<sup>+</sup>: 529.2006, found 529.1977.

### 3. Preparation of substrates **1l** and **1m**

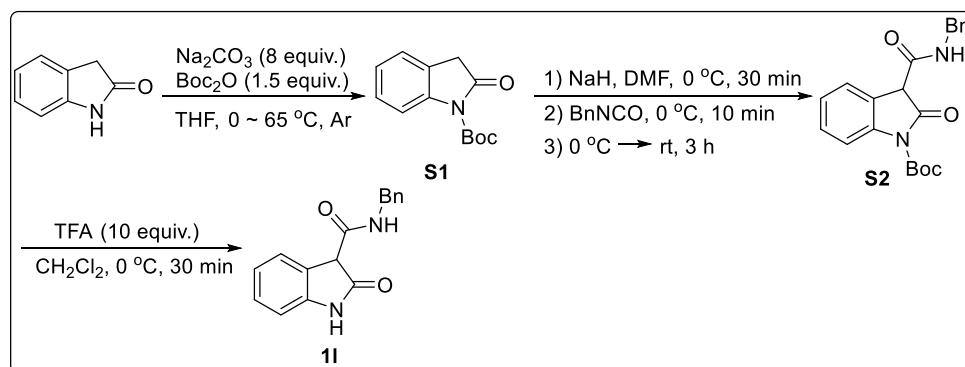

An over-dried round-bottom flask was charged with 2-oxindole (1.33 g, 10.0 mmol, 1.0 equiv.) in dry THF (40 mL) under argon atmosphere. After the resultant solution was cooled to 0 °C,  $\text{Na}_2\text{CO}_3$  (8.48 g, 80 mmol, 8.0 equiv.) and  $\text{Boc}_2\text{O}$  (3.27 g, 15.0 mmol, 1.5 equiv.) were added and the resulted mixture was stirred at 65 °C for 8 hours. The reaction was quenched with ice-water and diluted with 40 mL of EtOAc. The organic layer was dried by  $\text{Na}_2\text{SO}_4$  and concentrated after the filtration in a rotary evaporator under vacuum. The residue was purified by flash chromatography to afford the corresponding **S1** as a white solid.

To a stirred suspension of sodium hydride (0.24 g, 6.0 mmol, 1.2 equiv., 60% dispersion in mineral oil) in dry DMF (5 mL) at 0 °C under argon atmosphere was added **S1** (1.17 g, 5.0 mmol, 1.0 equiv.) in small portions. The mixture was stirred for 30 minutes at 0 °C. Isocyanatobenzene (0.80 g, 6.0 mmol, 1.2 equiv.) was slowly added, and this reaction was maintained at 0 °C for 10 minutes and further stirred at room temperature for 3 h (monitored by TLC). The reaction mixture was then poured into ice-cooled water (100 mL) and was acidized with HCl (1 M) to pH 4-6. The desired products **S2** were obtained after filtration and washed with ether.

The **S2** (1.09 g, 3 mmol, 1.0 equiv.) was dissolved in 10 mL  $\text{CH}_2\text{Cl}_2$  and cooled to 0 °C. TFA (2.3 mL, 30 mmol, 10.0 equiv) was added dropwise and the resulting mixture was stirred at 0 °C for 30 min. The reaction mixture was concentrated under reduced pressure and the residue was purified by flash chromatography to afford the **1l** as white solid (0.34g, 42% yield).  $^1\text{H}$  NMR (400 MHz,  $\text{DMSO}-d_6$ )  $\delta$  10.55 (s, 1H), 8.87 (dd,  $J = 6.0, 6.0$  Hz, 1H), 7.37-7.30 (m, 4H), 7.27 (dd,  $J = 9.6, 6.8$  Hz, 1H), 7.21 (d,  $J = 8.0$  Hz, 2H), 6.95 (dd,  $J = 7.6, 7.6$  Hz, 1H), 6.84 (d,  $J = 7.6$  Hz, 1H), 4.46 (s, 1H), 4.35 (d,  $J = 6.0$  Hz, 2H).  $^{13}\text{C}$  NMR (100 MHz,  $\text{DMSO}-d_6$ )  $\delta$  174.44, 166.63, 143.88, 139.45, 128.82, 127.65, 127.37, 126.93, 124.77, 121.96, 109.90, 53.84, 42.89.

**HRMS  $m/z$  (ESI):** calcd for  $C_{16}H_{14}N_2O_2Na^+$   $[M+Na]^+$ : 289.0947, found 289.0957.

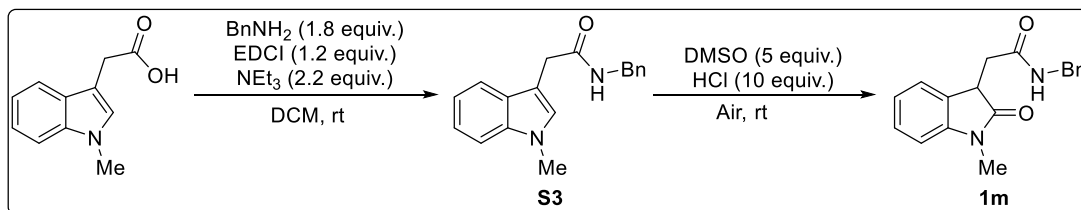

To a 50 mL round bottom flask was added *N*-Me-indole acetic acid (1.89 g, 10 mmol, 1.0 equiv.) and CH<sub>2</sub>Cl<sub>2</sub> (30 mL). Then, Et<sub>3</sub>N (3 mL, 22 mmol; 2.2 equiv.) was added, followed by EDCI (2.16 g, 12 mmol; 1.2 equiv.). The mixture was allowed to stir for a few minutes, and then the benzylamine (2 mL, 18 mmol, 1.8 equiv.) was added. Upon consumption of starting material, the reaction was diluted with water. The mixture was poured into a separatory funnel and washed with 1.0 M NaOH several times and brine and dried over Na<sub>2</sub>SO<sub>4</sub>. The residue was purified by flash column chromatography to give **S3**.

To a solution of **S3** (1.06 g, 3.8 mmol, 1.0 equiv.) in DMSO (1.3 mL, 19 mmol, 5.0 equiv.) at ambient temperature was added dropwise 12.1 M HCl (10.5 mL, 38 mmol, 10.0 equiv.). After the oxidation was completed, the reaction mixture was neutralized with saturated NaHCO<sub>3</sub> and extracted with CH<sub>2</sub>Cl<sub>2</sub>. The combined organic layers were washed with saturated brine, dried over anhydrous Na<sub>2</sub>SO<sub>4</sub> and concentrated under reduced pressure. The residue was purified by flash column chromatography to give **1m** as a white solid (0.90g, 82% yield). <sup>1</sup>H NMR (**400 MHz, CDCl<sub>3</sub>**) δ 7.32-7.22 (m, 7H), 7.06-7.00 (m, 2H), 6.80 (d, *J* = 7.6 Hz, 1H), 4.51-4.35 (m, 2H), 3.82 (t, *J* = 6.8 Hz, 1H), 3.14 (s, 3H), 2.91 (dd, *J* = 15.2, 5.6 Hz, 1H), 2.57 (dd, *J* = 15.2, 7.6 Hz, 1H). <sup>13</sup>C NMR (**100 MHz, CDCl<sub>3</sub>**) δ 177.60, 170.12, 143.93, 138.28, 128.65, 128.30, 128.28, 127.77, 127.39, 124.27, 122.76, 108.17, 43.66, 42.31, 37.07, 26.30. **HRMS  $m/z$  (ESI):** calcd for  $C_{18}H_{19}N_2O_2^+$   $[M+H]^+$ : 295.1441, found 295.1439.

## 4. Reaction optimization

Table S1. Reaction optimization<sup>a</sup>

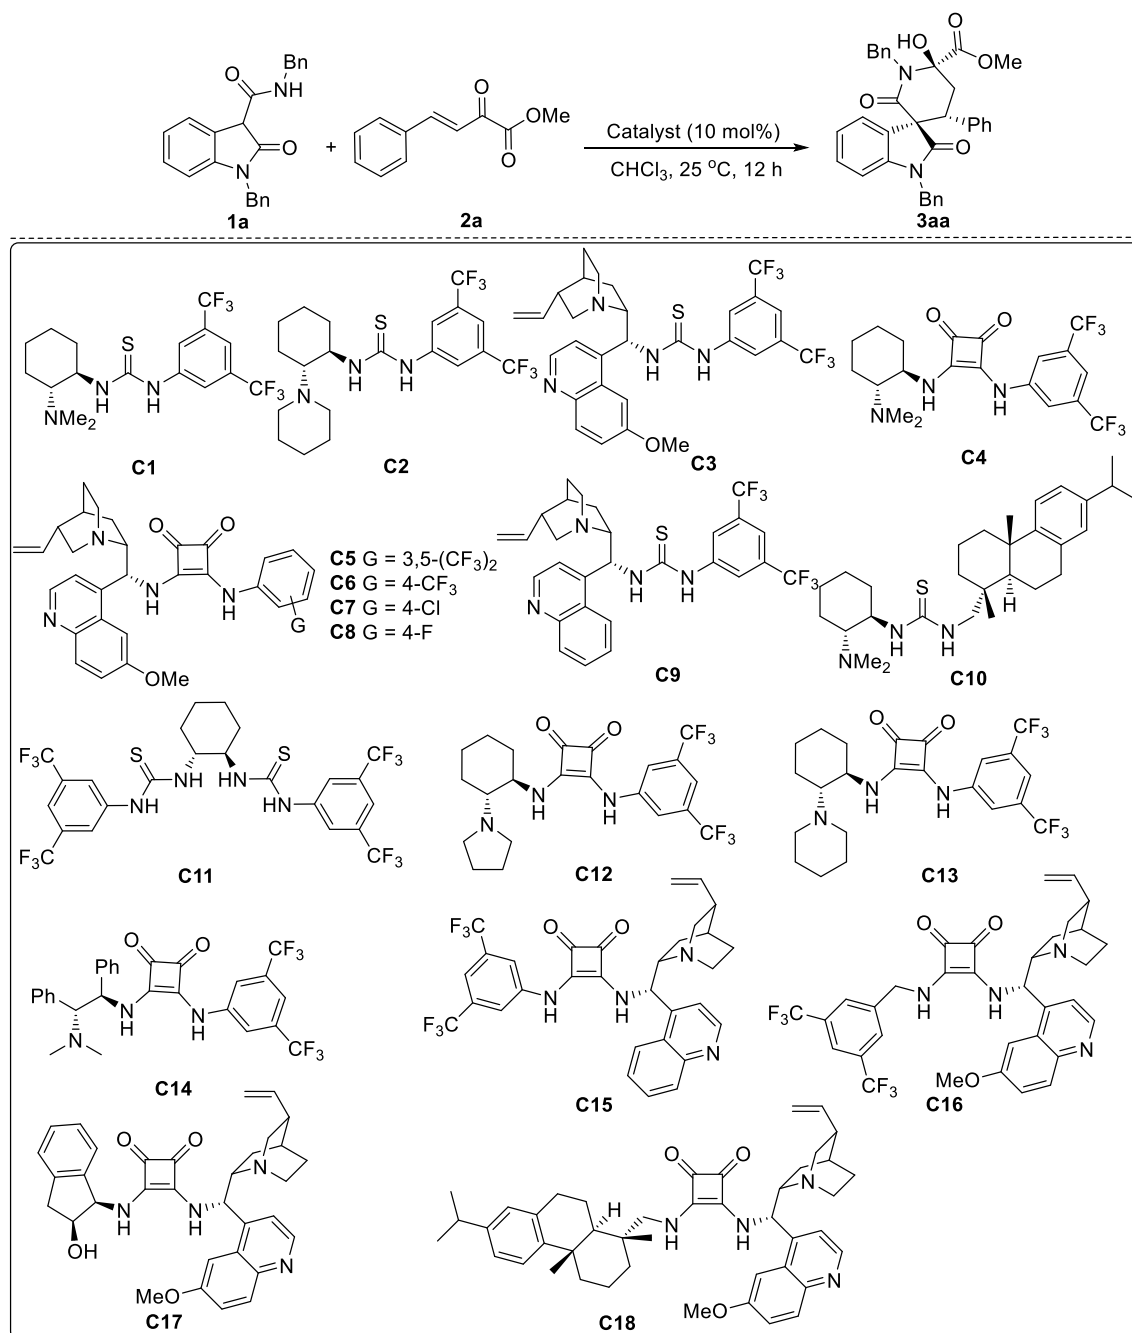

| Entry | Catalyst  | Solvent           | temperature | Time | Yield(%) <sup>b</sup> | <i>dr</i> <sup>c</sup> | <i>ee</i> (%) <sup>d</sup> |
|-------|-----------|-------------------|-------------|------|-----------------------|------------------------|----------------------------|
| 1     | <b>C1</b> | CHCl <sub>3</sub> | 25          | 12   | 78                    | >95:5                  | 24                         |
| 2     | <b>C2</b> | CHCl <sub>3</sub> | 25          | 12   | 71                    | >95:5                  | 6                          |
| 3     | <b>C3</b> | CHCl <sub>3</sub> | 25          | 12   | 73                    | >95:5                  | 54                         |

|                       |            |                                 |            |           |           |                 |           |
|-----------------------|------------|---------------------------------|------------|-----------|-----------|-----------------|-----------|
| 4                     | <b>C4</b>  | CHCl <sub>3</sub>               | 25         | 12        | 67        | >95:5           | 40        |
| 5                     | <b>C5</b>  | CHCl <sub>3</sub>               | 25         | 12        | 71        | >95:5           | 46        |
| 6                     | <b>C6</b>  | CHCl <sub>3</sub>               | 25         | 12        | 68        | >95:5           | 61        |
| 7                     | <b>C7</b>  | CHCl <sub>3</sub>               | 25         | 12        | 75        | >95:5           | 78        |
| 8                     | <b>C8</b>  | CHCl <sub>3</sub>               | 25         | 12        | 80        | >95:5           | 80        |
| 9                     | <b>C9</b>  | CHCl <sub>3</sub>               | 25         | 12        | 73        | >95:5           | 52        |
| 10                    | <b>C10</b> | CHCl <sub>3</sub>               | 25         | 12        | 66        | >95:5           | 8         |
| 11                    | <b>C11</b> | CHCl <sub>3</sub>               | 25         | 12        | trace     | -               | -         |
| 12                    | <b>C12</b> | CHCl <sub>3</sub>               | 25         | 12        | 64        | >95:5           | 16        |
| 13                    | <b>C13</b> | CHCl <sub>3</sub>               | 25         | 12        | 75        | >95:5           | 40        |
| 14                    | <b>C14</b> | CHCl <sub>3</sub>               | 25         | 12        | 70        | >95:5           | 52        |
| 15                    | <b>C15</b> | CHCl <sub>3</sub>               | 25         | 12        | 77        | >95:5           | -56       |
| 16                    | <b>C16</b> | CHCl <sub>3</sub>               | 25         | 12        | 69        | >95:5           | -58       |
| 17                    | <b>C17</b> | CHCl <sub>3</sub>               | 25         | 12        | 68        | >95:5           | -50       |
| 18                    | <b>C18</b> | CHCl <sub>3</sub>               | 25         | 12        | 71        | >95:5           | -35       |
| 19                    | <b>C8</b>  | CH <sub>2</sub> Cl <sub>2</sub> | 25         | 12        | 77        | >95:5           | 60        |
| 20                    | <b>C8</b>  | THF                             | 25         | 12        | 79        | >95:5           | 49        |
| 21                    | <b>C8</b>  | CH <sub>3</sub> CN              | 25         | 12        | 76        | >95:5           | 18        |
| 22                    | <b>C8</b>  | CH <sub>3</sub> OH              | 25         | 12        | 71        | >95:5           | 12        |
| 23                    | <b>C8</b>  | CHCl <sub>3</sub>               | 0          | 24        | 77        | >95:5           | 86        |
| 24                    | <b>C8</b>  | CHCl <sub>3</sub>               | -15        | 72        | 73        | >95:5           | 89        |
| 25                    | <b>C8</b>  | CHCl <sub>3</sub>               | -40        | 72        | 56        | >95:5           | 77        |
| 26 <sup>e</sup>       | <b>C8</b>  | CHCl <sub>3</sub>               | -15        | 72        | trace     | -               | -         |
| 27 <sup>f</sup>       | <b>C8</b>  | CHCl <sub>3</sub>               | -15        | 72        | 76        | >95:5           | 65        |
| <b>28<sup>g</sup></b> | <b>C8</b>  | <b>CHCl<sub>3</sub></b>         | <b>-15</b> | <b>72</b> | <b>79</b> | <b>&gt;95:5</b> | <b>91</b> |

<sup>a</sup>Unless otherwise specified, reactions were carried out with **1a** (0.1 mmol), **2a** (0.14 mmol), and catalyst (10 mol%) in solvent (1 mL) at the specified temperature for the indicated time. <sup>b</sup>Yields of isolated products. <sup>c</sup>The diastereomeric ratio (*dr*) value was determined by <sup>1</sup>H NMR analysis of the crude products. <sup>d</sup>The enantiomeric excess (*ee*) value was determined by HPLC analysis. <sup>e</sup>3Å molecular sieve (50 mg) was used. <sup>f</sup>4Å molecular sieve (50 mg) was used. <sup>g</sup>5Å molecular sieve (50 mg) was used.



## 5. Chiral squaramide-catalyzed asymmetric [3+3] annulation

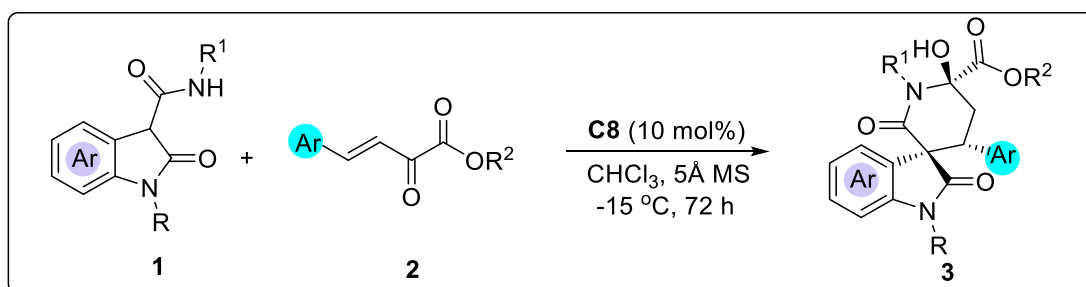

An argon purged reaction tube was charged with 3-carboxamide oxindoles **1** (0.1 mmol),  $\beta,\gamma$ -unsaturated  $\alpha$ -keto esters **2** (0.14 mmol), catalyst **C8** (0.01 mmol) and 5Å molecular sieve (50 mg). Then, freshly distilled  $\text{CHCl}_3$  (1 mL) was added and the reaction mixture was stirred at  $-15\text{ }^\circ\text{C}$  for 72 h. After completion of the reaction, the crude product was purified by flash column chromatography on silica gel to afford the corresponding products **3**. The diastereomeric ratio was determined by crude  $^1\text{H}$  NMR analysis and the enantiomeric excess was determined by chiral-phase HPLC analysis.

### (3*R*,4'*R*,6'*R*)-methyl1,1'-dibenzyl-6'-hydroxy-2,2'-dioxo-4'-phenylspiro[indoline-3,3'-piperidine]-6'-carboxylate (**3aa**)

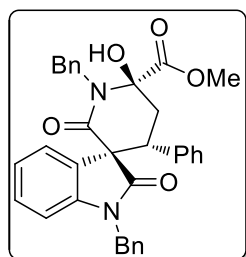

White solid; 43.1 mg, 79% yield;  $dr > 95:5$ ;  $ee = 91\%$ , determined by HPLC analysis [Chiralpak IB, *n*-hexane/*i*-PrOH = 90/10, 1.0 mL/min,  $\lambda = 254\text{ nm}$ ,  $t_r(\text{major}) = 20.16\text{ min}$ ,  $t_r(\text{minor}) = 14.72\text{ min}$ ];  $[\alpha]_{\text{D}}^{25} = -92.4$  ( $c\ 0.01$ ,  $\text{CH}_2\text{Cl}_2$ );  $^1\text{H}$  NMR (400 MHz,  $\text{CDCl}_3$ )  $\delta$  7.69 (d,  $J = 7.2\text{ Hz}$ , 1H), 7.29-7.04 (m, 13H), 6.91 (d,  $J = 7.6\text{ Hz}$ , 2H), 6.55 (d,  $J = 7.2\text{ Hz}$ , 2H), 6.39 (d,  $J = 7.6\text{ Hz}$ , 1H), 5.25 (d,  $J = 16.0\text{ Hz}$ , 1H), 5.04 (d,  $J = 16.0\text{ Hz}$ , 1H), 4.74 (s, 1H), 4.48 (d,  $J = 16.4\text{ Hz}$ , 1H), 4.42 (dd,  $J = 14.4, 2.8\text{ Hz}$ , 1H), 4.13 (d,  $J = 15.6\text{ Hz}$ , 1H), 3.39 (t,  $J = 14.0\text{ Hz}$ , 1H), 3.31 (s, 3H), 2.21 (dd,  $J = 14.0, 2.8\text{ Hz}$ , 1H);  $^{13}\text{C}$  NMR (100 MHz,  $\text{CDCl}_3$ )  $\delta$  174.27, 172.06, 168.50, 144.23, 137.13, 136.89, 134.76, 129.34, 128.55, 128.52, 128.22, 128.19, 128.07, 127.87, 127.64, 127.20, 127.03, 126.42, 124.02, 122.33, 110.20, 84.84, 62.30, 53.62, 45.77, 43.74, 41.31, 36.22; HRMS  $m/z$  (ESI): calcd for  $\text{C}_{34}\text{H}_{30}\text{N}_2\text{O}_5\text{Na}^+$   $[\text{M}+\text{Na}]^+$ : 569.2052, found 569.2035.

**(3*R*,4'*R*,6'*R*)-methyl 1'-benzyl-6'-hydroxy-2,2'-dioxo-1,4'-diphenylspiro[indoline-3,3'-piperidine]-6'-carboxylate (3ba)**

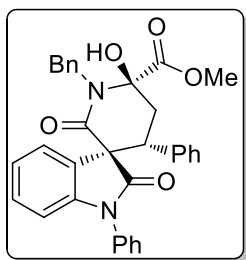

White solid; 39.4 mg, 74% yield; *dr* > 95:5; *ee* = 84%, determined by HPLC analysis [Chiralpak IB, *n*-hexane/*i*-PrOH = 92/8, 1.0 mL/min,  $\lambda$  = 254 nm,  $t_r$ (major) = 33.30 min,  $t_r$ (minor) = 18.03 min];  $[\alpha]_D^{25}$  = -47.4 (*c* 0.01, CH<sub>2</sub>Cl<sub>2</sub>); **<sup>1</sup>H NMR (400 MHz, CDCl<sub>3</sub>)**  $\delta$  7.68 (d, *J* = 7.2 Hz, 1H), 7.40-7.04 (m, 13H), 6.88 (d, *J* = 7.6 Hz, 4H), 6.45 (d, *J* = 8.0 Hz, 1H), 5.28 (d, *J* = 16.0 Hz, 1H), 4.76 (s, 1H), 4.38 (d, *J* = 14.2 Hz, 1H), 4.15 (d, *J* = 15.6 Hz, 1H), 3.39-3.32 (m, 4H), 2.22 (d, *J* = 12.8 Hz, 1H); **<sup>13</sup>C NMR (100 MHz, CDCl<sub>3</sub>)**  $\delta$  173.48, 172.05, 168.38, 145.18, 137.17, 136.36, 133.83, 129.46, 129.24, 128.26, 128.22, 128.10, 127.86, 127.65, 127.57, 127.24, 126.80, 124.06, 122.69, 109.98, 84.86, 62.50, 53.65, 45.82, 41.82, 35.46; **HRMS *m/z* (ESI):** calcd for C<sub>33</sub>H<sub>28</sub>N<sub>2</sub>O<sub>5</sub>Na<sup>+</sup> [M+Na]<sup>+</sup>: 555.1896, found 555.1893.

**(3*R*,4'*R*,6'*R*)-methyl 1'-benzyl-6'-hydroxy-1-methyl-2,2'-dioxo-4'-phenylspiro[indoline-3,3'-piperidine]-6'-carboxylate (3ca)**

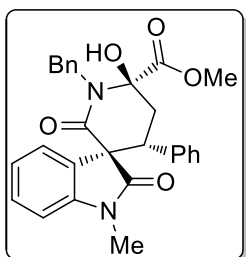

White solid; 35.3 mg, 75% yield; *dr* > 95:5; *ee* = 99%, determined by HPLC analysis [Chiralpak OD-H, *n*-hexane/*i*-PrOH = 85/15, 1.0 mL/min,  $\lambda$  = 254 nm,  $t_r$ (major) = 13.22 min,  $t_r$ (minor) = 17.18 min];  $[\alpha]_D^{25}$  = -68.3 (*c* 0.01, CH<sub>2</sub>Cl<sub>2</sub>); **<sup>1</sup>H NMR (400 MHz, CDCl<sub>3</sub>)**  $\delta$  7.60 (d, *J* = 7.2 Hz, 1H), 7.28-7.16 (m, 6H), 7.11-6.98 (m, 4H), 6.83 (d, *J* = 7.6 Hz, 2H), 6.56 (d, *J* = 8.0 Hz, 1H), 5.22 (d, *J* = 15.6 Hz, 1H), 4.80 (s, 1H), 4.34 (dd, *J* = 14.0, 2.8 Hz, 1H), 4.14 (d, *J* = 16.0 Hz, 1H), 3.37-3.30 (m, 4H), 2.91 (s, 3H), 2.18 (dd, *J* = 13.6, 2.8 Hz, 1H); **<sup>13</sup>C NMR (100 MHz, CDCl<sub>3</sub>)**  $\delta$  174.25, 172.04, 168.35, 144.84, 137.20, 136.36, 129.30, 128.20, 128.09, 127.92, 127.82, 127.60, 127.45, 127.18, 123.76, 122.26, 108.68, 84.85, 62.38, 53.60, 45.87, 41.22, 35.43, 26.09; **HRMS *m/z* (ESI):** calcd for C<sub>28</sub>H<sub>26</sub>N<sub>2</sub>O<sub>5</sub>Na<sup>+</sup> [M+Na]<sup>+</sup>: 493.1793, found 493.1781.

**(3*R*,4'*R*,6'*R*)-methyl 1'-benzyl-5-chloro-6'-hydroxy-1-methyl-2,2'-dioxo-4'-phenyl spiro[indoline-3,3'-piperidine]-6'-carboxylate (3da)**

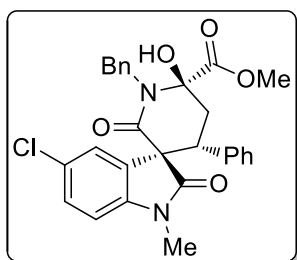

White solid; 38.8 mg, 77% yield; *dr* > 95:5; *ee* = 96%, determined by HPLC analysis [Chiralpak IB, *n*-hexane/*i*-PrOH = 85/15, 1.0 mL/min,  $\lambda$  = 254 nm,  $t_r$ (major) = 18.09 min,  $t_r$ (minor) = 12.73 min];  $[\alpha]_D^{25}$  = -58.5 (*c* 0.01, CH<sub>2</sub>Cl<sub>2</sub>); **<sup>1</sup>H NMR (400 MHz, CDCl<sub>3</sub>)**  $\delta$  7.64 (d, *J* = 2.0 Hz, 1H), 7.29-7.23 (m, 4H), 7.17 (d, *J* = 7.6 Hz, 2H), 7.09-7.04 (m, 3H), 6.85 (d, *J* = 7.6 Hz, 2H), 6.50 (d, *J* = 8.4 Hz, 1H), 5.18 (d, *J* = 16.0 Hz, 1H), 4.79 (s, 1H), 4.32 (dd, *J* = 14.0, 2.8 Hz, 1H), 4.16 (d, *J* = 16.0 Hz, 1H), 3.33 (s, 3H), 3.27 (t, *J* = 14.0 Hz, 1H), 2.89 (s, 3H), 2.21 (dd, *J* = 14.0, 2.8 Hz, 1H); **<sup>13</sup>C NMR (100 MHz, CDCl<sub>3</sub>)**  $\delta$  173.77, 171.82, 167.71, 143.52, 136.94, 135.98, 129.31, 129.16, 128.29, 128.06, 127.85, 127.83, 127.70, 127.47, 127.33, 124.62, 109.51, 84.79, 62.42, 53.61, 45.85, 41.12, 35.46, 26.20; **HRMS *m/z* (ESI):** calcd for C<sub>28</sub>H<sub>25</sub>ClN<sub>2</sub>O<sub>5</sub>Na<sup>+</sup> [M+Na]<sup>+</sup>: 527.1350, found 527.1347.

**(3*R*,4'*R*,6'*R*)-methyl 1'-benzyl-5-bromo-6'-hydroxy-1-methyl-2,2'-dioxo-4'-phenyl spiro[indoline-3,3'-piperidine]-6'-carboxylate (3ea)**

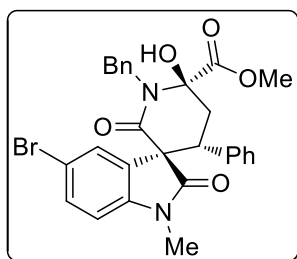

White solid; 40.6 mg, 74% yield; *dr* > 95:5; *ee* = 90%, determined by HPLC analysis [Chiralpak OD-H, *n*-hexane/*i*-PrOH = 85/15, 1.0 mL/min,  $\lambda$  = 254 nm,  $t_r$ (major) = 14.83 min,  $t_r$ (minor) = 10.93 min];  $[\alpha]_D^{25}$  = -57.1 (*c* 0.01, CH<sub>2</sub>Cl<sub>2</sub>); **<sup>1</sup>H NMR (400 MHz, CDCl<sub>3</sub>)**  $\delta$  7.81 (s, 1H), 7.40 (d, *J* = 8.0 Hz, 1H), 7.32-7.23 (m, 4H), 7.16 (d, *J* = 7.6 Hz, 2H), 7.10-7.03 (m, 3H), 6.85 (d, *J* = 7.2 Hz, 2H), 6.46 (d, *J* = 8.0 Hz, 1H), 5.21 (d, *J* = 15.6 Hz, 1H), 4.75 (s, 1H), 4.30 (dd, *J* = 14.4, 3.2 Hz, 1H), 4.13 (d, *J* = 15.6 Hz, 1H), 3.32 (s, 3H), 3.27 (t, *J* = 14.0 Hz, 1H), 2.88 (s, 3H), 2.21 (dd, *J* = 14.0, 3.2 Hz, 1H); **<sup>13</sup>C NMR (100 MHz, CDCl<sub>3</sub>)**  $\delta$  173.60, 171.87, 167.71, 144.02, 136.94, 135.98, 132.04, 129.67, 128.32, 128.07, 127.93, 127.87, 127.74, 127.49, 127.34, 114.67, 110.03, 84.72, 62.31, 53.63, 45.71, 41.13, 35.47, 26.17; **HRMS *m/z* (ESI):** calcd for C<sub>28</sub>H<sub>25</sub>BrN<sub>2</sub>O<sub>5</sub>Na<sup>+</sup> [M+Na]<sup>+</sup>: 571.0845, found 571.0836.

**(3*R*,4'*R*,6'*R*)-methyl 1'-benzyl-6'-hydroxy-1,5-dimethyl-2,2'-dioxo-4'-phenylspiro [indoline-3,3'-piperidine]-6'-carboxylate (3fa)**

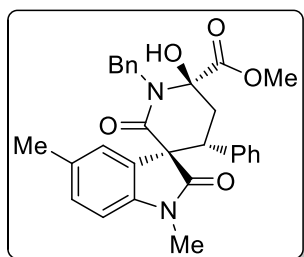

White solid; 36.3 mg, 75% yield; *dr* > 95:5; *ee* = 99%, determined by HPLC analysis [Chiralpak IB, *n*-hexane/*i*-PrOH = 95/5, 1.0 mL/min,  $\lambda$  = 254 nm,  $t_r$ (major) = 49.49 min,  $t_r$ (minor) = 25.67 min];  $[\alpha]_D^{25}$  = -60.1 (*c* 0.01, CH<sub>2</sub>Cl<sub>2</sub>); **<sup>1</sup>H NMR (400 MHz, CDCl<sub>3</sub>)**  $\delta$  7.46 (s, 1H), 7.28-7.17 (m, 5H), 7.09-7.05 (m, 2H), 7.01 (dd, *J* = 7.6, 7.2 Hz, 2H), 6.83 (d, *J* = 7.6 Hz, 2H), 6.46 (d, *J* = 8.0 Hz, 1H), 5.21 (d, *J* = 15.6 Hz, 1H), 4.90 (s, 1H), 4.31 (dd, *J* = 14.4, 3.2 Hz, 1H), 4.15 (d, *J* = 15.6 Hz, 1H), 3.37-3.31 (m, 4H), 2.88 (s, 3H), 2.38 (s, 3H), 2.18 (dd, *J* = 14.0, 3.2 Hz, 1H). **<sup>13</sup>C NMR (100 MHz, CDCl<sub>3</sub>)**  $\delta$  174.18, 171.93, 168.46, 142.46, 137.26, 136.48, 131.54, 129.51, 128.13, 128.11, 127.96, 127.78, 127.63, 127.44, 127.19, 124.93, 108.42, 84.96, 62.39, 53.42, 45.77, 41.13, 35.56, 26.11, 21.44; **HRMS *m/z* (ESI):** calcd for C<sub>29</sub>H<sub>28</sub>N<sub>2</sub>O<sub>5</sub>Na<sup>+</sup> [M+Na]<sup>+</sup>: 507.1896, found 507.1883.

**(3*R*,4'*R*,6'*R*)-methyl 1'-benzyl-6'-hydroxy-5-methoxy-1-methyl-2,2'-dioxo-4'-phenylspiro [indoline-3,3'-piperidine]-6'-carboxylate (3ga)**

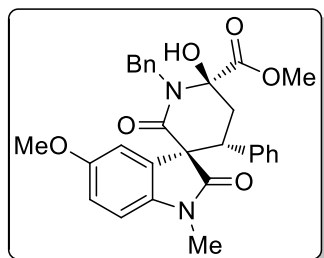

White solid; 39.0 mg, 78% yield; *dr* = 93:7; *ee* = 99%, determined by HPLC analysis [Chiralpak OD-H, *n*-hexane/*i*-PrOH = 85/15, 1.0 mL/min,  $\lambda$  = 254 nm,  $t_r$ (major) = 27.66 min,  $t_r$ (minor) = 14.53 min];  $[\alpha]_D^{25}$  = -72.7 (*c* 0.01, CH<sub>2</sub>Cl<sub>2</sub>); **<sup>1</sup>H NMR (400 MHz, CDCl<sub>3</sub>)**  $\delta$  7.30 (d, *J* = 2.4 Hz, 1H), 7.27-7.18 (m, 5H), 7.09-7.00 (m, 3H), 6.87-6.85 (m, 2H), 6.80 (dd, *J* = 8.4, 2.4 Hz, 1H), 6.47 (d, *J* = 8.8 Hz, 1H), 5.25 (d, *J* = 15.6 Hz, 1H), 4.77 (s, 1H), 4.32 (dd, *J* = 14.4, 2.8 Hz, 1H), 4.12 (d, *J* = 15.6 Hz, 1H), 3.81 (s, 3H), 3.36-3.29 (m, 4H), 2.88 (s, 3H), 2.18 (dd, *J* = 14.0, 3.2 Hz, 1H); **<sup>13</sup>C NMR (100 MHz, CDCl<sub>3</sub>)**  $\delta$  173.92, 171.88, 168.25, 155.60, 138.43, 137.29, 136.38, 128.82, 128.16, 128.13, 127.93, 127.65, 127.47, 127.19, 113.81, 111.47, 108.98, 84.88, 62.68, 55.78, 53.51, 45.74, 41.14, 35.41, 26.16; **HRMS *m/z* (ESI):** calcd for C<sub>29</sub>H<sub>28</sub>N<sub>2</sub>O<sub>6</sub>Na<sup>+</sup> [M+Na]<sup>+</sup>: 523.1845, found 523.1826.

**(3*R*,4'*R*,6'*R*)-methyl 1'-benzyl-6-chloro-6'-hydroxy-1-methyl-2,2'-dioxo-4'-phenyl spiro[indoline-3,3'-piperidine]-6'-carboxylate (3ha)**

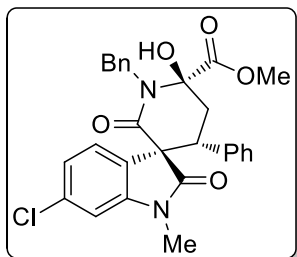

White solid; 39.3 mg, 78% yield; *dr* = 93:7; *ee* = 92%, determined by HPLC analysis [Chiralpak IB, *n*-hexane/*i*-PrOH = 85/15, 1.0 mL/min,  $\lambda$  = 254 nm,  $t_r$ (major) = 18.34 min,  $t_r$ (minor) = 11.41 min];  $[\alpha]_D^{25}$  = -47.0 (*c* 0.01, CH<sub>2</sub>Cl<sub>2</sub>); **<sup>1</sup>H NMR (400 MHz, CDCl<sub>3</sub>)**  $\delta$  7.49 (d, *J* = 8.0 Hz, 1H), 7.30-7.22 (m, 4H), 7.16 (d, *J* = 7.2 Hz, 2H), 7.10-7.02 (m, 3H), 6.84 (d, *J* = 7.2 Hz, 2H), 6.57 (d, *J* = 2.0 Hz, 1H), 5.17 (d, *J* = 16.0 Hz, 1H), 4.70 (s, 1H), 4.31 (dd, *J* = 14.0, 2.8 Hz, 1H), 4.14 (d, *J* = 15.6 Hz, 1H), 3.33 (s, 3H), 3.25 (t, *J* = 14.0 Hz, 1H), 2.90 (s, 3H), 2.19 (dd, *J* = 14.0, 2.8 Hz, 1H); **<sup>13</sup>C NMR (100 MHz, CDCl<sub>3</sub>)**  $\delta$  174.17, 171.94, 167.92, 146.12, 137.03, 136.04, 135.23, 128.66, 128.27, 128.06, 127.83, 127.69, 127.31, 126.23, 124.57, 122.08, 109.40, 84.72, 62.10, 53.72, 45.90, 41.09, 35.40, 26.21; **HRMS *m/z* (ESI):** calcd for C<sub>28</sub>H<sub>25</sub>ClN<sub>2</sub>O<sub>5</sub>Na<sup>+</sup> [M+Na]<sup>+</sup>: 527.1350, found 527.1375.

**(3*R*,4'*R*,6'*R*)-methyl 1'-benzyl-6-bromo-6'-hydroxy-1-methyl-2,2'-dioxo-4'-phenyl spiro[indoline-3,3'-piperidine]-6'-carboxylate (3ia)**

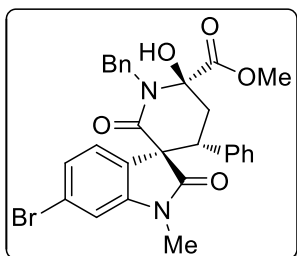

White solid; 41.1mg, 75% yield; *dr* > 95:5; *ee* = 92%, determined by HPLC analysis [Chiralpak OD-H, *n*-hexane/*i*-PrOH = 85/15, 1.0 mL/min,  $\lambda$  = 254 nm,  $t_r$ (major) = 37.25 min,  $t_r$ (minor) = 22.82 min];  $[\alpha]_D^{25}$  = -49.6 (*c* 0.01, CH<sub>2</sub>Cl<sub>2</sub>); **<sup>1</sup>H NMR (400 MHz, CDCl<sub>3</sub>)**  $\delta$  7.43 (d, *J* = 8.0 Hz, 1H), 7.29-7.22 (m, 4H), 7.16 (d, *J* = 7.2 Hz, 2H), 7.10-7.03 (m, 3H), 6.82 (d, *J* = 7.2 Hz, 2H), 6.72 (d, *J* = 2.0 Hz, 1H), 5.17 (d, *J* = 16.0 Hz, 1H), 4.66 (s, 1H), 4.31 (dd, *J* = 14.4, 2.8 Hz, 1H), 4.13 (d, *J* = 15.6 Hz, 1H), 3.32 (s, 3H), 3.24 (t, *J* = 14.0 Hz, 1H), 2.90 (s, 3H), 2.18 (dd, *J* = 13.6, 2.8 Hz, 1H); **<sup>13</sup>C NMR (100 MHz, CDCl<sub>3</sub>)**  $\delta$  174.18, 171.79, 167.82, 146.18, 137.03, 136.03, 128.26, 128.04, 127.84, 127.83, 127.70, 127.28, 126.82, 125.09, 124.95, 123.06, 112.20, 84.83, 62.20, 53.65, 45.97, 41.01, 35.42, 26.21; **HRMS *m/z* (ESI):** calcd for C<sub>28</sub>H<sub>25</sub>BrN<sub>2</sub>O<sub>5</sub>Na<sup>+</sup> [M+Na]<sup>+</sup>: 571.0845, found 571.0838.

**(3*R*,4'*R*,6'*R*)-methyl 1'-ethyl-6'-hydroxy-1-methyl-2,2'-dioxo-4'-phenylspiro[indoline-3,3'-piperidine]-6'-carboxylate (3ja)**

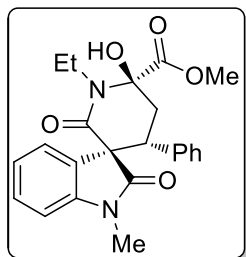

White solid; 29.4mg, 72% yield; *dr* > 95:5; *ee* = 96%, determined by HPLC analysis [Chiralpak OD-H, *n*-hexane/*i*-PrOH = 85/15, 1.0 mL/min,  $\lambda$  = 254 nm,  $t_r$ (major) = 13.60 min,  $t_r$ (minor) = 12.28 min];  $[\alpha]_D^{25}$  = -77.6 (*c* 0.01, CH<sub>2</sub>Cl<sub>2</sub>); **<sup>1</sup>H NMR (400 MHz, CDCl<sub>3</sub>)**  $\delta$  7.54 (d, *J* = 7.4 Hz, 1H), 7.22 (dd, *J* = 8.0, 7.6 Hz, 1H), 7.05 (dd, *J* = 7.6, 7.6 Hz, 2H), 6.99 (dd, *J* = 7.6, 7.2 Hz, 2H), 6.80 (d, *J* = 7.6 Hz, 2H), 6.52 (d, *J* = 8.0 Hz, 1H), 4.53 (s, 1H), 4.25 (dd, *J* = 14.4, 2.8 Hz, 1H), 4.07 (s, 3H), 3.35-3.23 (m, 3H), 2.89 (s, 3H), 2.17 (dd, *J* = 13.6, 2.8 Hz, 1H), 1.19 (t, *J* = 7.0 Hz, 3H); **<sup>13</sup>C NMR (100 MHz, CDCl<sub>3</sub>)**  $\delta$  174.37, 172.83, 167.29, 144.74, 136.37, 129.15, 127.88, 127.67, 127.57, 127.40, 123.80, 122.20, 108.50, 86.36, 62.32, 54.35, 41.17, 40.58, 35.96, 26.04, 13.45; **HRMS *m/z* (ESI):** calcd for C<sub>23</sub>H<sub>24</sub>N<sub>2</sub>O<sub>5</sub>Na<sup>+</sup> [M+Na]<sup>+</sup>: 431.1583, found 431.1560.

**(3*R*,4'*R*,6'*R*)-methyl 1'-benzyl-4'-(4-fluorophenyl)-6'-hydroxy-1-methyl-2,2'-dioxospiro[indoline-3,3'-piperidine]-6'-carboxylate (3cb)**

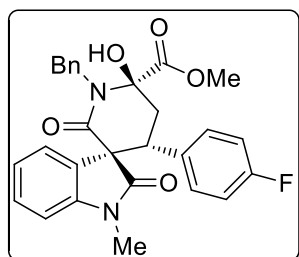

White solid; 36.6 mg, 75% yield; *dr* > 95:5; *ee* = 95%, determined by HPLC analysis [Chiralpak IB, *n*-hexane/*i*-PrOH = 90/10, 1.0 mL/min,  $\lambda$  = 254 nm,  $t_r$ (major) = 23.13 min,  $t_r$ (minor) = 19.60 min];  $[\alpha]_D^{25}$  = -92.4 (*c* 0.01, CH<sub>2</sub>Cl<sub>2</sub>); **<sup>1</sup>H NMR (400 MHz, CDCl<sub>3</sub>)**  $\delta$  7.59 (d, *J* = 7.2 Hz, 1H), 7.28-7.21 (m, 4H), 7.16 (d, *J* = 7.2 Hz, 2H), 7.10 (dd, *J* = 7.6, 7.6 Hz, 1H), 6.80 (dd, *J* = 8.4, 5.6 Hz, 2H), 6.69 (dd, *J* = 8.8, 8.8 Hz, 2H), 6.60 (d, *J* = 8.0 Hz, 1H), 5.21 (d, *J* = 16.0 Hz, 1H), 4.89 (s, 1H), 4.32 (dd, *J* = 14.4, 2.8 Hz, 1H), 4.13 (d, *J* = 15.6 Hz, 1H), 3.32-3.25 (m, 4H), 2.94 (s, 3H), 2.16 (dd, *J* = 14.0, 3.2 Hz, 1H); **<sup>13</sup>C NMR (100 MHz, CDCl<sub>3</sub>)**  $\delta$  174.20, 171.86, 168.17, 161.99 (d, *J* = 246.3 Hz), 144.79, 137.11, 132.21 (d, *J* = 3.4 Hz), 129.55, 129.47, 128.22, 128.06, 127.56, 127.21, 123.73, 122.39, 114.51 (d, *J* = 21.2 Hz), 108.86, 84.79, 62.32, 53.62, 45.88, 40.52, 35.58, 26.14; **HRMS *m/z* (ESI):** calcd for C<sub>28</sub>H<sub>25</sub>FN<sub>2</sub>O<sub>5</sub>Na<sup>+</sup> [M+Na]<sup>+</sup>: 511.1645, found 511.1636.

**(3*R*,4'*R*,6'*R*)-methyl 1'-benzyl-4'-(4-bromophenyl)-6'-hydroxy-1-methyl-2,2'-dioxospiro[indoline-3,3'-piperidine]-6'-carboxylate (3cc)**

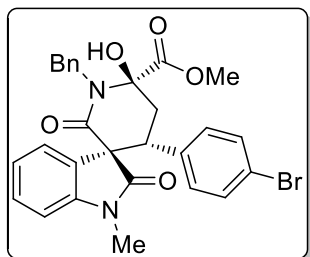

White solid; 42.2 mg, 77% yield; *dr* > 95:5; *ee* = 99%, determined by HPLC analysis [Chiralpak IB, *n*-hexane/*i*-PrOH = 85/15, 1.0 mL/min,  $\lambda$  = 254 nm,  $t_r$ (major) = 19.24 min,  $t_r$ (minor) = 9.25 min];  $[\alpha]_D^{25}$  = -55.4 (*c* 0.01, CH<sub>2</sub>Cl<sub>2</sub>); **<sup>1</sup>H NMR (400 MHz, CDCl<sub>3</sub>)**  $\delta$  7.58 (d, *J* = 7.2 Hz, 1H), 7.31-7.21 (m, 4H), 7.17-7.08 (m, 5H), 6.71 (d, *J* = 8.4 Hz, 2H), 6.63 (d, *J* = 7.6 Hz, 1H), 5.20 (d, *J* = 16.0 Hz, 1H), 4.86 (s, 1H), 4.29 (dd, *J* = 14.0, 2.8 Hz, 1H), 4.12 (d, *J* = 15.6 Hz, 1H), 3.32-3.25 (m, 4H), 2.96 (s, 3H), 2.14 (dd, *J* = 14.0, 3.2 Hz, 1H); **<sup>13</sup>C NMR (100 MHz, CDCl<sub>3</sub>)**  $\delta$  174.10, 171.81, 168.08, 144.78, 137.06, 135.51, 130.78, 129.65, 129.57, 128.23, 128.06, 127.41, 127.24, 123.71, 122.44, 121.55, 109.01, 84.71, 62.08, 53.66, 45.87, 40.67, 35.35, 26.22; **HRMS *m/z* (ESI):** calcd for C<sub>28</sub>H<sub>25</sub>BrN<sub>2</sub>O<sub>5</sub>Na<sup>+</sup> [M+Na]<sup>+</sup>: 571.0845, found 571.0850.

**(3*R*,4'*R*,6'*R*)-methyl 1'-benzyl-6'-hydroxy-1-methyl-2,2'-dioxo-4'-(*p*-tolyl)spiro[indoline-3,3'-piperidine]-6'-carboxylate (3cd)**

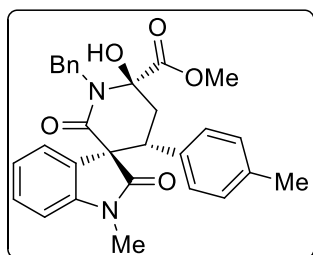

White solid; 37.3 mg, 77% yield; *dr* > 95:5; *ee* = 92%, determined by HPLC analysis [Chiralpak IB, *n*-hexane/*i*-PrOH = 85/15, 1.0 mL/min,  $\lambda$  = 254 nm,  $t_r$ (major) = 33.23 min,  $t_r$ (minor) = 17.93 min];  $[\alpha]_D^{25}$  = -60.2 (*c* 0.01, CH<sub>2</sub>Cl<sub>2</sub>); **<sup>1</sup>H NMR (400 MHz, CDCl<sub>3</sub>)**  $\delta$ : 7.59 (d, *J* = 7.6 Hz, 1H), 7.28-7.16 (m, 6H), 7.09 (dd, *J* = 7.6, 7.6 Hz, 1H), 6.80 (d, *J* = 8.0 Hz, 2H), 6.70 (d, *J* = 8.0 Hz, 2H), 6.58 (d, *J* = 8.0 Hz, 1H), 5.20 (d, *J* = 15.6 Hz, 1H), 4.83 (s, 1H), 4.29 (dd, *J* = 14.4, 2.8 Hz, 1H), 4.13 (d, *J* = 16.0 Hz, 1H), 3.34-3.27 (m, 4H), 2.93 (s, 3H), 2.16-2.13 (m, 4H); **<sup>13</sup>C NMR (100 MHz, CDCl<sub>3</sub>)**  $\delta$ : 174.41, 172.03, 168.46, 144.87, 137.21, 136.99, 133.35, 129.23, 128.30, 128.19, 128.07, 127.95, 127.75, 127.15, 123.76, 122.23, 108.73, 84.90, 62.42, 53.56, 45.89, 40.82, 35.64, 26.13, 20.98; **HRMS *m/z* (ESI):** calcd for C<sub>29</sub>H<sub>28</sub>N<sub>2</sub>O<sub>5</sub>Na<sup>+</sup> [M+Na]<sup>+</sup>: 507.1896, found 507.1883.

**(3*R*,4'*R*,6'*R*)-methyl 1'-benzyl-6'-hydroxy-4'-(4-methoxyphenyl)-1-methyl-2,2'-dioxospiro[indoline-3,3'-piperidine]-6'-carboxylate (3ce)**

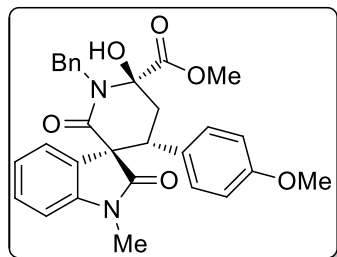

White solid; 37.0 mg, 74% yield; *dr* > 95:5; *ee* = 97%, determined by HPLC analysis [Chiralpak IB, *n*-hexane/*i*-PrOH = 85/15, 1.0 mL/min,  $\lambda$  = 254 nm,  $t_r$ (major) = 40.66 min,  $t_r$ (minor) = 23.79 min];  $[\alpha]_D^{25}$  = -61.7 (*c* 0.01, CH<sub>2</sub>Cl<sub>2</sub>); **<sup>1</sup>H NMR (400 MHz, CDCl<sub>3</sub>)**  $\delta$  7.58 (d, *J* = 7.2 Hz, 1H), 7.28-7.21 (m, 4H), 7.18 (d, *J* = 7.2 Hz, 2H), 7.09 (dd, *J* = 7.6, 7.6 Hz, 1H), 6.74 (d, *J* = 8.8 Hz, 2H), 6.59 (d, *J* = 7.6 Hz, 1H), 6.53 (d, *J* = 8.4 Hz, 2H), 5.21 (d, *J* = 15.6 Hz, 1H), 4.73 (s, 1H), 4.28 (dd, *J* = 14.4, 2.8 Hz, 1H), 4.12 (d, *J* = 16.0 Hz, 1H), 3.67 (s, 3H), 3.31-3.24 (m, 4H), 2.94 (s, 3H), 2.14 (dd, *J* = 13.6, 2.8 Hz, 1H); **<sup>13</sup>C NMR (100 MHz, CDCl<sub>3</sub>)**  $\delta$  174.32, 172.12, 168.45, 158.69, 144.91, 137.22, 129.27, 128.96, 128.56, 128.20, 128.09, 127.89, 127.17, 123.72, 122.20, 112.93, 108.77, 84.83, 62.48, 55.08, 53.59, 45.82, 40.51, 35.77, 26.14; **HRMS *m/z* (ESI):** calcd for C<sub>29</sub>H<sub>28</sub>N<sub>2</sub>O<sub>6</sub>Na<sup>+</sup> [*M*+Na]<sup>+</sup>: 523.1845, found 523.1836.

**(3*R*,4'*R*,6'*R*)-methyl 1'-benzyl-4'-(3-fluorophenyl)-6'-hydroxy-1-methyl-2,2'-dioxospiro[indoline-3,3'-piperidine]-6'-carboxylate (3cf)**

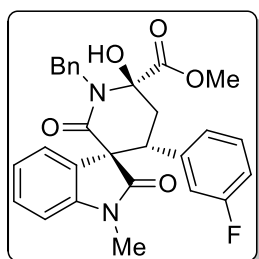

White solid; 38.1 mg, 78% yield; *dr* > 95:5; *ee* = 98%, determined by HPLC analysis [Chiralpak IB, *n*-hexane/*i*-PrOH = 92/8, 1.0 mL/min,  $\lambda$  = 254 nm,  $t_r$ (major) = 36.80 min,  $t_r$ (minor) = 29.42 min];  $[\alpha]_D^{25}$  = -58.9 (*c* 0.01, CH<sub>2</sub>Cl<sub>2</sub>); **<sup>1</sup>H NMR (400 MHz, DMSO-*d*<sub>6</sub>)**  $\delta$  7.66 (d, *J* = 7.6 Hz, 1H), 7.41 (s, 1H), 7.32-7.10 (m, 8H), 6.92 (dd, *J* = 8.8, 8.0 Hz, 1H), 6.82 (d, *J* = 7.6 Hz, 1H), 6.69 (d, *J* = 7.6 Hz, 1H), 6.53 (d, *J* = 10.4 Hz, 1H), 4.70 (d, *J* = 16.0 Hz, 1H), 4.30 (d, *J* = 16.0 Hz, 1H), 4.17 (d, *J* = 14.0 Hz, 1H), 3.43-3.25 (m, 4H), 2.87 (s, 3H), 2.17 (dd, *J* = 14.0, 2.8 Hz, 1H); **<sup>13</sup>C NMR (100 MHz, DMSO-*d*<sub>6</sub>)**  $\delta$  174.14, 171.20, 167.54, 163.06, 160.64, 144.78, 140.02 (d, *J* = 7.4 Hz), 137.80, 129.97 (d, *J* = 8.1 Hz), 129.77, 128.26, 127.55, 127.05, 124.49, 124.27, 122.77, 114.70 (d, *J* = 22.7 Hz), 109.38, 86.11, 62.04, 53.11, 47.05, 40.65, 35.11, 26.32; **HRMS *m/z* (ESI):** calcd for C<sub>28</sub>H<sub>25</sub>FN<sub>2</sub>O<sub>5</sub>Na<sup>+</sup> [*M*+Na]<sup>+</sup>: 511.1645, found 511.1664.



**(3*R*,4'*R*,6'*R*)-methyl 1'-benzyl-4'-(3-chlorophenyl)-6'-hydroxy-1-methyl-2,2'-dioxospiro[indoline-3,3'-piperidine]-6'-carboxylate (3cg)**

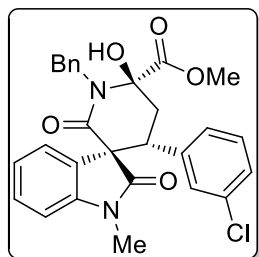

White solid; 37.3 mg, 74% yield; *dr* > 95:5; *ee* = 90%, determined by HPLC analysis [Chiralpak OD-H, *n*-hexane/*i*-PrOH = 85/15, 1.0 mL/min,  $\lambda$  = 254 nm,  $t_r$ (major) = 10.77 min,  $t_r$ (minor) = 7.53 min];  $[\alpha]_D^{25}$  = -78.1 (*c* 0.01, CH<sub>2</sub>Cl<sub>2</sub>); **<sup>1</sup>H NMR (400 MHz, CDCl<sub>3</sub>)**  $\delta$  7.57 (d, *J* = 7.6 Hz, 1H), 7.31-7.21 (m, 4H), 7.17 (d, *J* = 7.2 Hz, 2H), 7.11 (dd, *J* = 7.6, 7.6 Hz, 1H), 7.04 (d, *J* = 8.0 Hz, 1H), 6.96 (dd, *J* = 8.0, 7.6 Hz, 1H), 6.78 (d, *J* = 7.6 Hz, 2H), 6.62 (d, *J* = 7.6 Hz, 1H), 5.20 (d, *J* = 16.0 Hz, 1H), 4.88 (s, 1H), 4.30 (dd, *J* = 14.4, 2.8 Hz, 1H), 4.13 (d, *J* = 15.6 Hz, 1H), 3.32-3.25 (m, 4H), 2.96 (s, 3H), 2.17 (dd, *J* = 13.6, 2.8 Hz, 1H); **<sup>13</sup>C NMR (100 MHz, CDCl<sub>3</sub>)**  $\delta$  174.13, 171.72, 168.02, 144.70, 138.47, 137.07, 133.49, 129.60, 128.88, 128.22, 128.04, 127.87, 127.66, 127.42, 127.22, 126.38, 123.71, 122.51, 108.91, 84.75, 62.10, 53.64, 45.93, 40.90, 35.27, 26.18; **HRMS *m/z* (ESI):** calcd for C<sub>28</sub>H<sub>25</sub>ClN<sub>2</sub>O<sub>5</sub>Na<sup>+</sup> [*M*+Na]<sup>+</sup>: 527.1530, found 527.1333.

**(3*R*,4'*R*,6'*R*)-methyl 1'-benzyl-4'-(3-bromophenyl)-6'-hydroxy-1-methyl-2,2'-dioxospiro[indoline-3,3'-piperidine]-6'-carboxylate (3ch)**

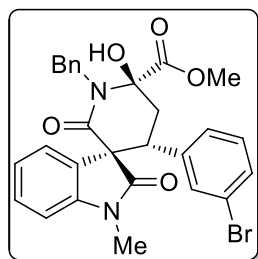

White solid; 41.1 mg, 75% yield; *dr* > 95:5; *ee* = 99%, determined by HPLC analysis [Chiralpak IA, *n*-hexane/*i*-PrOH = 85/15, 1.0 mL/min,  $\lambda$  = 254 nm,  $t_r$ (major) = 26.75 min,  $t_r$ (minor) = 29.00 min];  $[\alpha]_D^{25}$  = -73.6 (*c* 0.01, CH<sub>2</sub>Cl<sub>2</sub>); **<sup>1</sup>H NMR (400 MHz, DMSO-*d*<sub>6</sub>)**  $\delta$  7.64 (d, *J* = 7.2 Hz, 1H), 7.41 (s, 1H), 7.31-7.12 (m, 8H), 7.03 (dd, *J* = 8.0, 7.6 Hz, 1H), 6.91 (s, 1H), 6.84-6.81 (m, 2H), 4.71 (d, *J* = 16.0 Hz, 1H), 4.30 (d, *J* = 16.0 Hz, 1H), 4.13 (dd, *J* = 14.0, 2.8 Hz, 1H), 3.39-3.31 (m, 4H), 2.87 (s, 3H), 2.18 (dd, *J* = 14.4, 3.2 Hz, 1H); **<sup>13</sup>C NMR (100 MHz, DMSO-*d*<sub>6</sub>)**  $\delta$  178.87, 175.90, 172.22, 149.49, 144.48, 142.54, 135.51, 135.47, 134.96, 134.57, 133.02, 132.30, 132.20, 132.08, 131.81, 128.98, 127.53, 126.08, 114.19, 90.84, 66.77, 57.89, 51.79, 45.49, 39.71, 31.07; **HRMS *m/z* (ESI):** calcd for C<sub>28</sub>H<sub>25</sub>BrN<sub>2</sub>O<sub>5</sub>Na<sup>+</sup> [*M*+Na]<sup>+</sup>: 571.0845, found 571.0851.

**(3*R*,4'*R*,6'*R*)-methyl 1'-benzyl-6'-hydroxy-1-methyl-2,2'-dioxo-4'-(*m*-tolyl)spiro[indoline-3,3'-piperidine]-6'-carboxylate (3ci)**

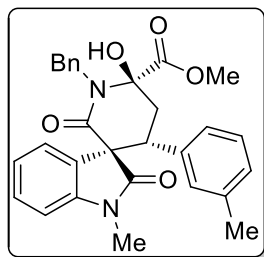

White solid; 36.8mg, 76% yield; *dr* > 95:5; *ee* = 98%, determined by HPLC analysis [Chiralpak IB, *n*-hexane/*i*-PrOH = 85/15, 1.0 mL/min,  $\lambda$  = 254 nm,  $t_r$ (major) = 12.37 min,  $t_r$ (minor) = 16.48 min];  $[\alpha]_D^{25}$  = -67.2 (*c* 0.01, CH<sub>2</sub>Cl<sub>2</sub>); **<sup>1</sup>H NMR (400 MHz, CDCl<sub>3</sub>)**  $\delta$  7.60 (d, *J* = 7.2 Hz, 1H), 7.27-7.16 (m, 6H), 7.09 (dd, *J* = 7.6, 7.6 Hz, 1H), 6.89-6.86 (m, 2H), 6.63-6.60 (m, 2H), 6.56 (d, *J* = 7.6 Hz, 1H), 5.20 (d, *J* = 16.0 Hz, 1H), 4.86 (br, 1H), 4.29 (dd, *J* = 14.4, 2.8 Hz, 1H), 4.14 (d, *J* = 15.6 Hz, 1H), 3.34-3.27 (m, 4H), 2.90 (s, 3H), 2.17 (dd, *J* = 13.6, 2.8 Hz, 1H), 2.09 (s, 3H); **<sup>13</sup>C NMR (100 MHz, CDCl<sub>3</sub>)**  $\delta$  174.36, 172.00, 168.42, 144.85, 137.23, 137.20, 136.30, 129.24, 128.67, 128.19, 128.10, 128.06, 127.97, 127.41, 127.15, 124.95, 123.77, 122.21, 108.66, 84.93, 62.39, 53.56, 45.92, 41.17, 35.55, 26.07, 21.16; **HRMS *m/z* (ESI):** calcd for C<sub>29</sub>H<sub>28</sub>N<sub>2</sub>O<sub>5</sub>Na<sup>+</sup> [M+Na]<sup>+</sup>: 507.1896, found 507.1883.

**(3*R*,4'*R*,6'*R*)-methyl 1'-benzyl-6'-hydroxy-4'-(3-methoxyphenyl)-1-methyl-2,2'-dioxospiro[indoline-3,3'-piperidine]-6'-carboxylate (3cj)**

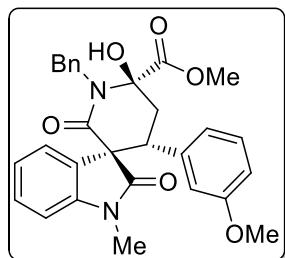

White solid; 37.0mg, 74% yield; *dr* = 91:9; *ee* = 93%, determined by HPLC analysis [Chiralpak IB, *n*-hexane/*i*-PrOH = 85/15, 1.0 mL/min,  $\lambda$  = 254 nm,  $t_r$ (major) = 23.42 min,  $t_r$ (minor) = 14.37 min];  $[\alpha]_D^{25}$  = -83.6 (*c* 0.01, CH<sub>2</sub>Cl<sub>2</sub>); **<sup>1</sup>H NMR (400 MHz, CDCl<sub>3</sub>)**  $\delta$  7.62 (d, *J* = 7.6 Hz, 1H), 7.39-7.16 (m, 6H), 7.12 (dd, *J* = 7.6, 7.2 Hz, 1H), 6.96 (dd, *J* = 8.0, 8.0 Hz, 1H), 6.65-6.61 (m, 2H), 6.52 (d, *J* = 7.6 Hz, 1H), 6.30 (s, 1H), 5.21 (d, *J* = 15.6 Hz, 1H), 4.84 (s, 1H), 4.33 (dd, *J* = 14.4, 3.2 Hz, 1H), 4.17 (d, *J* = 16.0 Hz, 1H), 3.55 (s, 3H), 3.35 (s, 3H), 3.29 (d, *J* = 13.6 Hz, 1H), 2.96 (s, 3H), 2.20 (dd, *J* = 13.6, 2.8 Hz, 1H); **<sup>13</sup>C NMR (100 MHz, CDCl<sub>3</sub>)**  $\delta$  174.21, 171.97, 168.30, 158.85, 144.95, 137.95, 137.18, 129.33, 128.61, 128.20, 128.07, 127.97, 127.18, 123.71, 122.24, 120.69, 113.77, 112.60, 108.79, 84.85, 62.28, 55.12, 53.60, 45.90, 41.20, 35.63, 26.14; **HRMS *m/z* (ESI):** calcd for C<sub>29</sub>H<sub>28</sub>N<sub>2</sub>O<sub>6</sub>Na<sup>+</sup> [M+Na]<sup>+</sup>: 523.1845, found 523.1857.

**(3*R*,4'*R*,6'*R*)-methyl 1'-benzyl-6'-hydroxy-1-methyl-2,2'-dioxo-4'-(*o*-tolyl)spiro[indoline-3,3'-piperidine]-6'-carboxylate (3ck)**

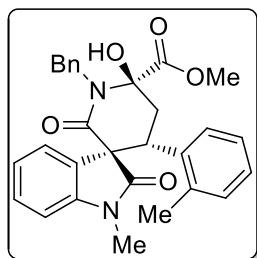

White solid; 31.0 mg, 64% yield; *dr* > 95:5; *ee* = 98%, determined by HPLC analysis [Chiralpak IB, *n*-hexane/*i*-PrOH = 93/7, 1.0 mL/min,  $\lambda$  = 254 nm,  $t_r$ (major) = 38.79 min,  $t_r$ (minor) = 26.95 min];  $[\alpha]_D^{25}$  = -53.4 (*c* 0.01, CH<sub>2</sub>Cl<sub>2</sub>); **<sup>1</sup>H NMR (400 MHz, CDCl<sub>3</sub>)**  $\delta$  7.70 (d, *J* = 7.6 Hz, 1H), 7.36 (dd, *J* = 8.0, 7.6 Hz, 1H), 7.30-7.11 (m, 6H), 7.06 (d, *J* = 7.6 Hz, 1H), 6.94 (dd, *J* = 7.6, 7.2, Hz, 1H), 6.68 (d, *J* = 8.0 Hz, 1H), 6.62 (dd, *J* = 7.6, 7.6 Hz, 1H), 6.21 (d, *J* = 8.0 Hz, 1H), 5.28 (d, *J* = 16.0 Hz, 1H), 4.85-4.54 (m, 2H), 4.08 (d, *J* = 16.0 Hz, 1H), 3.32-3.14 (m, 4H), 2.91 (s, 3H), 2.48 (s, 3H), 2.03 (dd, *J* = 14.0, 2.8 Hz, 1H); **<sup>13</sup>C NMR (100 MHz, CDCl<sub>3</sub>)**  $\delta$  174.22, 172.12, 168.80, 145.35, 137.27, 137.15, 135.39, 130.53, 129.50, 128.30, 128.18, 128.16, 127.18, 127.04, 126.39, 124.83, 124.21, 122.28, 108.89, 84.82, 61.75, 53.55, 45.67, 37.54, 35.63, 26.17, 20.17; **HRMS *m/z* (ESI):** calcd for C<sub>29</sub>H<sub>28</sub>N<sub>2</sub>O<sub>5</sub>Na<sup>+</sup> [*M*+Na]<sup>+</sup>: 507.1896, found 507.1883.

**(3*R*,4'*R*,6'*R*)-ethyl 1'-benzyl-6'-hydroxy-1-methyl-2,2'-dioxo-4'-phenylspiro[indoline-3,3'-piperidine]-6'-carboxylate (3cl)**

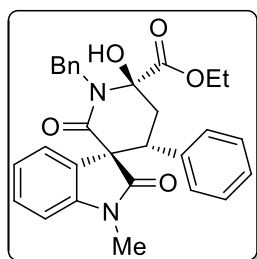

White solid; 33.4 mg, 69% yield; *dr* > 95:5; *ee* = 94%, determined by HPLC analysis [Chiralpak AD-H, *n*-hexane/*i*-PrOH = 85/15, 1.0 mL/min,  $\lambda$  = 254 nm,  $t_r$ (major) = 22.64 min,  $t_r$ (minor) = 25.61 min];  $[\alpha]_D^{25}$  = -92.4 (*c* 0.01, CH<sub>2</sub>Cl<sub>2</sub>); **<sup>1</sup>H NMR (400 MHz, CDCl<sub>3</sub>)**  $\delta$  7.65 (d, *J* = 7.6, 1H), 7.29-7.26 (m, 2H), 7.24-7.17 (m, 4H), 7.09-7.04 (m, 2H), 7.02-6.98 (m, 2H), 6.82 (d, *J* = 7.2 Hz, 2H), 6.57 (d, *J* = 8.0 Hz, 1H), 5.19 (d, *J* = 16.0 Hz, 1H), 4.75 (s, 1H), 4.32 (dd, *J* = 14.4, 3.2 Hz, 1H), 4.14 (d, *J* = 16.0 Hz, 1H), 4.12-3.98 (m, 1H), 3.46-3.21 (m, 2H), 2.90 (s, 3H), 2.18 (dd, *J* = 13.6, 2.8 Hz, 1H), 1.09 (t, *J* = 7.2 Hz, 3H); **<sup>13</sup>C NMR (100 MHz, CDCl<sub>3</sub>)**  $\delta$  174.14, 171.72, 168.36, 144.94, 137.39, 136.36, 129.31, 128.19, 128.14, 127.91, 127.71, 127.61, 127.47, 127.19, 123.83, 122.02, 108.69, 84.88, 63.66, 62.34, 45.95, 41.25, 35.61, 26.06, 13.51; **HRMS *m/z* (ESI):** calcd for C<sub>29</sub>H<sub>28</sub>N<sub>2</sub>O<sub>5</sub>Na<sup>+</sup> [*M*+Na]<sup>+</sup>: 507.1896, found 507.1895.

**(3*R*,4'*R*,6'*R*)-isopropyl 1'-benzyl-6'-hydroxy-1-methyl-2,2'-dioxo-4'-phenylspiro[indoline-3,3'-piperidine]-6'-carboxylate (3cm)**

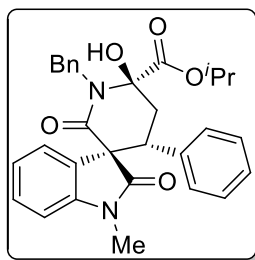

White solid; 32.9 mg, 66% yield; *dr* > 95:5; *ee* = 87%, determined by HPLC analysis [Chiralpak OD-H, *n*-hexane/*i*-PrOH = 85/15, 1.0 mL/min,  $\lambda$  = 254 nm,  $t_r$ (major) = 21.19 min,  $t_r$ (minor) = 13.77 min];  $[\alpha]_D^{25}$  = -71.3 (*c* 0.01, CH<sub>2</sub>Cl<sub>2</sub>); **<sup>1</sup>H NMR (400 MHz, CDCl<sub>3</sub>)**  $\delta$  7.67 (d, *J* = 7.6 Hz, 1H), 7.28-7.20 (m, 6H), 7.08-6.98 (m, 4H), 6.82 (d, *J* = 7.2 Hz, 2H), 6.56 (d, *J* = 8.0 Hz, 1H), 4.95 (d, *J* = 15.6 Hz, 1H), 4.73-4.67 (m, 2H), 4.34-4.27 (m, 2H), 3.33 (t, *J* = 14.0 Hz, 1H), 2.88 (s, 3H), 2.18 (dd, *J* = 14.0, 3.2 Hz, 1H), 1.34 (d, *J* = 6.4 Hz, 3H), 0.90 (d, *J* = 6.0 Hz, 3H); **<sup>13</sup>C NMR (100 MHz, CDCl<sub>3</sub>)**  $\delta$  174.13, 171.30, 168.38, 144.94, 137.45, 136.40, 129.30, 128.27, 127.94, 127.91, 127.62, 127.48, 127.15, 123.89, 121.97, 108.69, 85.47, 72.74, 62.37, 46.59, 41.24, 35.70, 26.04, 21.57, 20.88; **HRMS *m/z* (ESI):** calcd for C<sub>30</sub>H<sub>30</sub>N<sub>2</sub>O<sub>5</sub>Na<sup>+</sup> [M+Na]<sup>+</sup>: 521.2052, found 521.2059.

**Unsuccessful Examples**

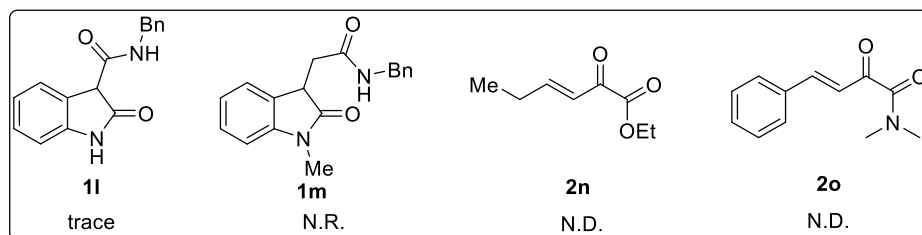

## 6. Scale-up and transformation of product 3

### (a) Scale-up reaction of 3ga

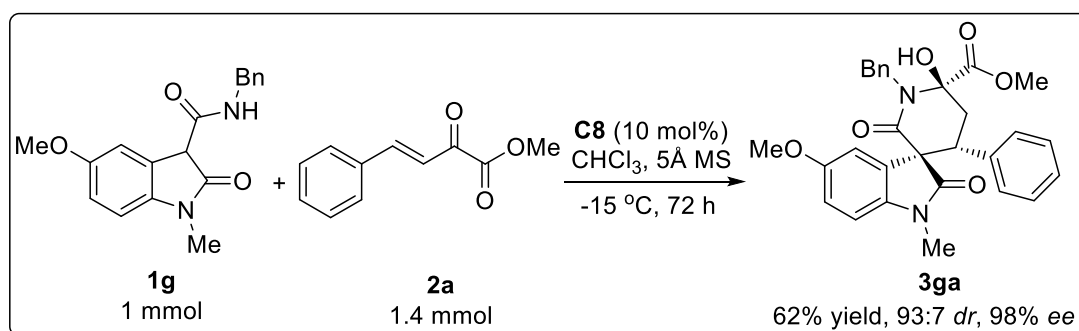

3-Carboxamide oxindole **1g** (1.0 mmol),  $\beta,\gamma$ -unsaturated  $\alpha$ -keto ester **2a** (1.4 mmol), catalyst **C8** (0.1 mmol) and 5Å molecular sieve (500 mg) was added to an argon purged vial. Then, freshly distilled  $\text{CHCl}_3$  (10 mL) was added and the reaction mixture was stirred at  $-15\text{ }^\circ\text{C}$  for 72 h. After completion of the reaction, the crude product was purified by flash column chromatography on silica gel to afford the desired product **3ga** as a white solid in 62% yield with 93:7 dr and 98% ee.

### (b) Transformation of 3ga

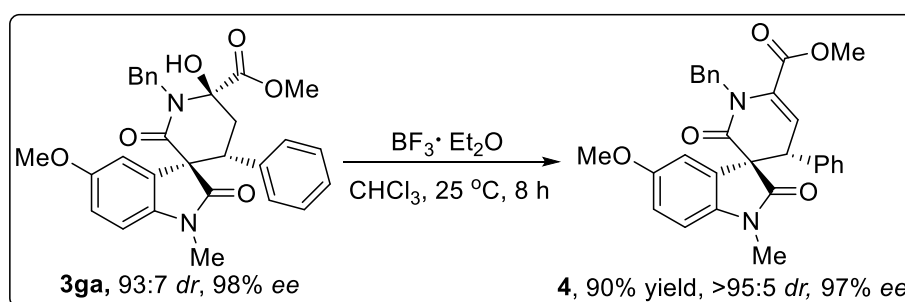

To an argon purged reaction tube containing **3ga** (0.1 mmol) and  $\text{BF}_3 \cdot \text{Et}_2\text{O}$  (0.12 mmol) was added freshly distilled  $\text{CHCl}_3$  (1 mL). After the reaction was stirred for 8 hours at room temperature, the resulted mixture was purified by flash column chromatography on silica gel to afford the desired product **4**.

### (3*R*,4'*R*)-methyl 1'-benzyl-5-methoxy-1-methyl-2,2'-dioxo-4'-phenyl-2',4'-dihydro-1'-H-spiro[indoline-3,3'-pyridine]-6'-carboxylate (**4**)

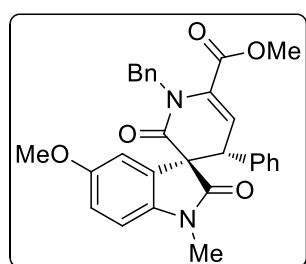

White solid; 43.4 mg, 90% yield; dr > 95:5; ee = 97%, determined by HPLC analysis [Chiralpak OD-H, *n*-hexane/*i*-PrOH = 85/15, 1.0 mL/min,  $\lambda = 254\text{ nm}$ ,  $t_r(\text{major}) = 13.25\text{ min}$ ,  $t_r(\text{minor}) = 15.63\text{ min}$ ];  $[\alpha]_D^{25} = +20.0$  ( $c\ 0.01$ ,  $\text{CH}_2\text{Cl}_2$ );  $^1\text{H NMR}$  (400 MHz,  $\text{CDCl}_3$ )  $\delta$  7.33-7.31 (m, 2H),

7.28-7.25 (m, 3H), 7.12-7.02 (m, 1H), 7.06-7.02 (m, 2H), 6.95 (d,  $J = 2.4$  Hz, 1H), 6.93-6.90 (m, 2H), 6.74 (dd,  $J = 8.8, 2.8$  Hz, 1H), 6.45 (d,  $J = 8.4$  Hz, 1H), 6.41 (d,  $J = 3.2$  Hz, 1H), 5.62 (d,  $J = 14.8$  Hz, 1H), 4.82 (d,  $J = 14.8$  Hz, 1H), 4.69 (d,  $J = 2.8$  Hz, 1H), 3.75 (d,  $J = 2.0$  Hz, 6H), 2.90 (s, 3H);  $^{13}\text{C}$  NMR (100 MHz,  $\text{CDCl}_3$ )  $\delta$  173.11, 166.77, 162.83, 155.54, 137.66, 136.62, 135.31, 133.91, 128.76, 128.65, 128.15, 127.85, 127.71, 127.65, 126.01, 122.13, 113.59, 112.12, 108.73, 60.43, 55.85, 52.66, 46.23, 45.72, 26.27; HRMS  $m/z$  (ESI): calcd for  $\text{C}_{29}\text{H}_{26}\text{N}_2\text{O}_5\text{Na}^+$   $[\text{M}+\text{Na}]^+$ : 505.1739, found 505.1735.

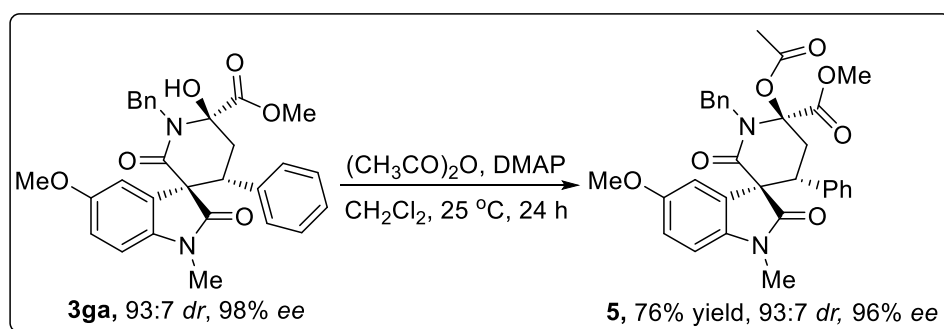

To an argon purged reaction tube containing **3ga** (0.1 mmol),  $(\text{CH}_3\text{CO})_2\text{O}$  (0.25 mmol) and DMAP (0.1 mmol) was added freshly distilled  $\text{CH}_2\text{Cl}_2$  (1 mL). After the reaction was stirred for 24 h at room temperature, the resulted mixture was purified by flash column chromatography on silica gel to afford the desired product **5**.

**(3*R*,4'*R*,6'*R*)-methyl 6'-acetoxy-1'-benzyl-5-methoxy-1-methyl-2,2'-dioxo-4'-phenylspiro[indoline-3,3'-piperidine]-6'-carboxylate (5)**

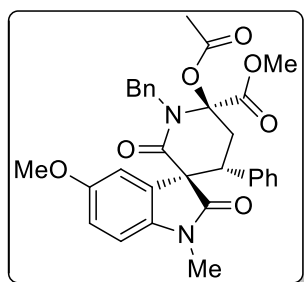

White solid; 41.2 mg, 76% yield;  $dr = 93:7$ ;  $ee = 96\%$ , determined by HPLC analysis [Chiralpak AD-H, *n*-hexane/*i*-PrOH = 85/15, 1.0 mL/min,  $\lambda = 254$  nm,  $t_r(\text{major}) = 20.16$  min,  $t_r(\text{minor}) = 12.40$  min];  $[\alpha]_{\text{D}}^{25} = -92.1$  ( $c$  0.01,  $\text{CH}_2\text{Cl}_2$ );  $^1\text{H}$  NMR (400 MHz,  $\text{CDCl}_3$ )  $\delta$  7.36 (d,  $J = 2.4$  Hz, 1H), 7.26-7.17 (m, 3H), 7.10-7.01 (m, 5H), 6.88 (d,  $J = 7.2$  Hz, 2H), 6.81 (dd,  $J = 8.4, 2.4$  Hz, 1H), 6.48 (d,  $J = 8.4$  Hz, 1H), 5.39 (d,  $J = 16.0$  Hz, 1H), 4.40 (d,  $J = 16.0$  Hz, 1H), 4.04 (dd,  $J = 14.8, 2.8$  Hz, 1H), 3.83 (s, 3H), 3.62 (t,  $J = 15.2$  Hz, 1H), 3.25 (s, 3H), 3.18 (dd,  $J = 15.6, 2.8$  Hz, 1H), 2.89 (s, 3H), 2.21 (s, 3H);  $^{13}\text{C}$  NMR (100 MHz,  $\text{CDCl}_3$ )  $\delta$  173.60, 170.11, 168.56, 165.80, 155.72, 138.23, 136.79, 135.87, 128.33, 128.12, 127.89, 127.72, 127.62, 127.22, 127.04, 114.30, 111.16, 109.16, 90.48, 62.68, 55.84, 53.24, 45.95, 40.52, 29.54, 26.20, 21.61; HRMS

$m/z$  (ESI): calcd for  $C_{31}H_{30}N_2O_7Na^+$  [M+Na] $^+$ : 565.1951, found 565.1945.

(c) Transformation of **3cm**

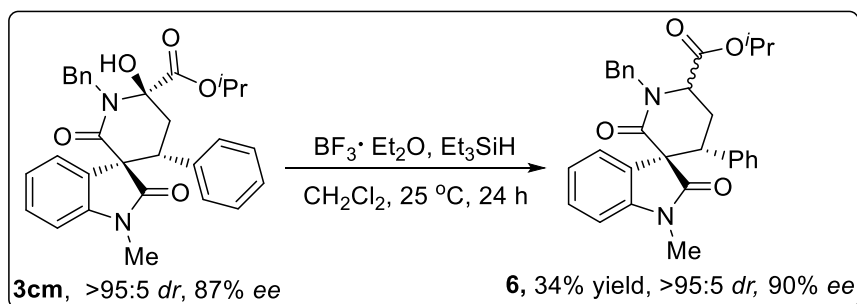

To an argon purged reaction tube containing **3cm** (0.1 mmol),  $BF_3 \cdot Et_2O$  (0.22 mmol) and  $Et_3SiH$  (0.2 mmol) was added freshly distilled  $CH_2Cl_2$  (1 mL). After the reaction was stirred for 24 h at room temperature, the resulted mixture was purified by flash column chromatography on silica gel to afford the desired product **6**.

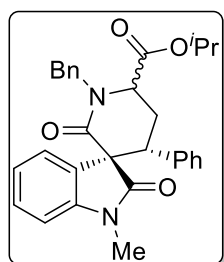

**(3*S*,4'*R*)-isopropyl 1'-benzyl-1-methyl-2,2'-dioxo-4'-phenylspiro[indoline-3,3'-piperidine]-6'-carboxylate (**6**)**

White solid; 16.4 mg, 34% yield; *dr* > 95:5; *ee* = 90%, determined by HPLC analysis [Chiralpak IA, *n*-hexane/*i*-PrOH = 85/15, 1.0 mL/min,  $\lambda$  = 254 nm,  $t_r$ (major) = 39.50 min,  $t_r$ (minor) = 15.23 min];  $[\alpha]_D^{25} = -77.4$  (*c* 0.01,  $CH_2Cl_2$ );  $^1H$  NMR (400 MHz,  $CDCl_3$ )  $\delta$  7.75 (d, *J* = 7.2 Hz, 1H), 7.40-7.32 (m, 5H), 7.23 (dd, *J* = 7.6, 1.2 Hz, 1H), 7.11-7.04 (m, 2H), 7.00-6.97 (m, 2H), 6.79-6.72 (m, 2H), 6.54 (d, *J* = 7.2 Hz, 1H), 5.58 (d, *J* = 14.8 Hz, 1H), 5.15 (p, *J* = 6.4 Hz, 1H), 4.26 (dd, *J* = 11.6, 6.4 Hz, 1H), 3.90 (d, *J* = 14.2 Hz, 1H), 3.74 (dd, *J* = 14.0, 3.2 Hz, 1H), 2.91-2.81 (m, 4H), 2.37-2.31 (m, 1H), 1.37 (d, *J* = 6.4 Hz, 3H), 1.28 (d, *J* = 6.4 Hz, 3H);  $^{13}C$  NMR (100 MHz,  $CDCl_3$ )  $\delta$  174.60, 171.05, 144.90, 136.48, 135.75, 129.18, 128.83, 128.61, 127.80, 127.70, 127.65, 127.63, 127.48, 124.63, 122.29, 108.37, 69.86, 61.99, 59.09, 48.53, 44.15, 27.82, 25.99, 21.81, 21.65; HRMS  $m/z$  (ESI): calcd for  $C_{30}H_{30}N_2O_4Na^+$  [M+Na] $^+$ : 505.2103, found 505.2100.

## 7. X-ray structures of **1c**, **3ca** and **3cf**

The absolute configurations of **1c**, **3ca** and **3cf** were determined by X-ray crystallography. The stereochemistry of **3aa**, **3ba**, **3da-3ja**, **3cb-3ce**, **3cg-3cm**, and **4-6** were assigned by analogy.

### (a) X-ray structure of substrate **1c**

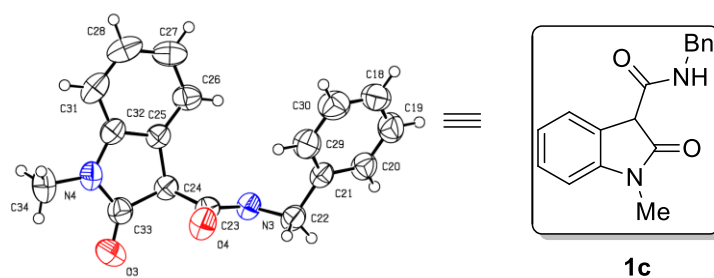

**Figure S1.** ORTEP diagram (50% probability) of **1c**

A single crystal of **1c** [C<sub>17</sub>H<sub>16</sub>N<sub>2</sub>O<sub>2</sub>] was obtained from diffusion of hexane into a solution of **1c** in DCM at room temperature. A suitable crystal of **1c** was selected and analyzed by an Agilent Gemini X-ray Single Crystal Diffractometer. Using Olex2<sup>4</sup>, the structure was solved with the ShelXT<sup>5</sup> structure solution program using Direct Methods and refined with the ShelXL<sup>6</sup> refinement package using Least Squares minimization. Details of the crystal, data collection, and structure refinement parameters for crystallographic analysis of **1c** are summarized in **Table S2**. Crystallographic data (CCDC 1963639) for **1c** can be obtained free of charge from the Cambridge Crystallographic Data Centre via [www.ccdc.cam.ac.uk/data\\_request/cif](http://www.ccdc.cam.ac.uk/data_request/cif).

**Table S2.** Parameters for crystallographic analysis of **1c**

|                       |                                                               |
|-----------------------|---------------------------------------------------------------|
| Identification code   | cu_20180303_sanxianan_0ma-auto                                |
| Empirical formula     | C <sub>34</sub> H <sub>32</sub> N <sub>4</sub> O <sub>4</sub> |
| Formula weight        | 560.63                                                        |
| Temperature/K         | 293(2)                                                        |
| Crystal system        | orthorhombic                                                  |
| Space group           | P2 <sub>1</sub> 2 <sub>1</sub> 2 <sub>1</sub>                 |
| a/Å                   | 22.2717(14)                                                   |
| b/Å                   | 14.1714(9)                                                    |
| c/Å                   | 9.3683(5)                                                     |
| α/°                   | 90                                                            |
| β/°                   | 96.922(3)                                                     |
| γ/°                   | 90                                                            |
| Volume/Å <sup>3</sup> | 2935.3(3)                                                     |
| Z                     | 4                                                             |



|                                                |                                                                    |
|------------------------------------------------|--------------------------------------------------------------------|
| $\rho_{\text{calc}}/\text{cm}^3$               | 1.269                                                              |
| $\mu/\text{mm}^{-1}$                           | 0.679                                                              |
| F(000)                                         | 1184                                                               |
| Radiation                                      | CuK $\alpha$ ( $\lambda = 1.54178$ )                               |
| Theta range for data collection/°              | 7.41 to 120.274                                                    |
| Index ranges                                   | $-25 \leq h \leq 25$ , $-15 \leq k \leq 15$ , $-10 \leq l \leq 10$ |
| Reflections collected                          | 37447                                                              |
| Independent reflections                        | 4369 [ $R_{\text{int}} = 0.0723$ , $R_{\text{sigma}} = 0.0459$ ]   |
| Data/restraints/parameters                     | 4369/0/321                                                         |
| Goodness-of-fit on $F^2$                       | 1.010                                                              |
| Final R indexes [ $I \geq 2\sigma(I)$ ]        | $R_1 = 0.0467$ , $wR_2 = 0.1111$                                   |
| Final R indexes [all data]                     | $R_1 = 0.0731$ , $wR_2 = 0.1260$                                   |
| Largest diff. peak/hole / $e \text{ \AA}^{-3}$ | 0.15/-0.20                                                         |

**(b) X-ray structure of product 3ca**

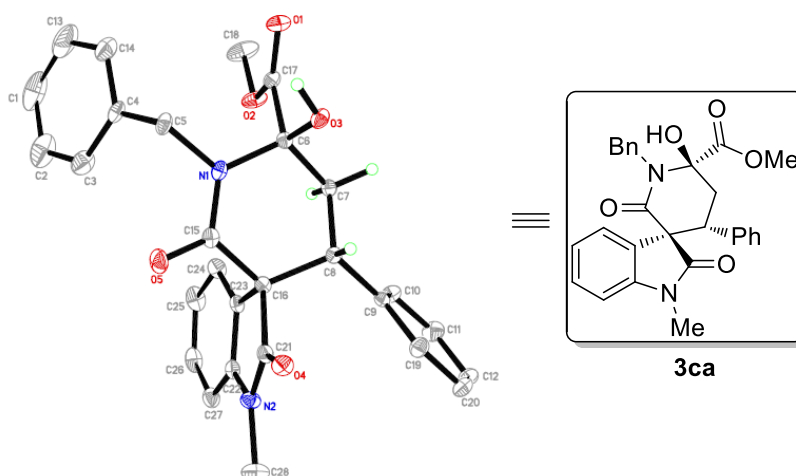

**Figure S2.** ORTEP diagram (30% probability) of **3ca**

A single crystal of **3ca** [ $\text{C}_{28}\text{H}_{26}\text{N}_2\text{O}_5$ ] was obtained from diffusion of hexane into a solution of **3ca** in DCM at room temperature. A suitable crystal of **3ca** was selected and analyzed by an Agilent Gemini X-ray Single Crystal Diffractometer. Using Olex2<sup>4</sup>, the structure was solved with the ShelXT<sup>5</sup> structure solution program using Direct Methods and refined with the ShelXL<sup>6</sup> refinement package using Least Squares minimization.

Refinement of the Flack parameter<sup>7</sup> for **3ca** was refined to the value of 0.00(8), which clearly suggests that the absolute configuration of the major isomer of **3ca** is (3*R*,4'*R*,6'*R*). Details of the crystal, data collection, and structure refinement parameters for crystallographic analysis of **3ca** are summarized in **Table S3**. Crystallographic data (CCDC 1963638) for **3ca** can be obtained free of charge from

the Cambridge Crystallographic Data Centre via  
[www.ccdc.cam.ac.uk/data\\_request/cif](http://www.ccdc.cam.ac.uk/data_request/cif).

**Table S3.** Parameters for crystallographic analysis of **3ca**

|                                             |                                                               |
|---------------------------------------------|---------------------------------------------------------------|
| Identification code                         | Cu_20170607nch3_0m-auto                                       |
| Empirical formula                           | C <sub>28</sub> H <sub>26</sub> N <sub>2</sub> O <sub>5</sub> |
| Formula weight                              | 470.51                                                        |
| Temperature/K                               | 149(2)                                                        |
| Crystal system                              | orthorhombic                                                  |
| Space group                                 | P2 <sub>1</sub> 2 <sub>1</sub> 2 <sub>1</sub>                 |
| a/Å                                         | 11.1247(17)                                                   |
| b/Å                                         | 11.7728(18)                                                   |
| c/Å                                         | 18.015(3)                                                     |
| α/°                                         | 90                                                            |
| β/°                                         | 90                                                            |
| γ/°                                         | 90                                                            |
| Volume/Å <sup>3</sup>                       | 2359.4(6)                                                     |
| Z                                           | 4                                                             |
| ρ <sub>calc</sub> /g/cm <sup>3</sup>        | 1.325                                                         |
| μ/mm <sup>-1</sup>                          | 0.746                                                         |
| F(000)                                      | 992.0                                                         |
| Radiation                                   | CuKα (λ = 1.54178)                                            |
| Theta range for data collection/°           | 8.972 to 127.732                                              |
| Index ranges                                | -12 ≤ h ≤ 12, -13 ≤ k ≤ 13, -20 ≤ l ≤ 20                      |
| Reflections collected                       | 34236                                                         |
| Independent reflections                     | 3889 [R <sub>int</sub> = 0.0541, R <sub>sigma</sub> = 0.0242] |
| Data/restraints/parameters                  | 3889/0/321                                                    |
| Goodness-of-fit on F <sup>2</sup>           | 1.095                                                         |
| Final R indexes [I ≥ 2σ (I)]                | R <sub>1</sub> = 0.0293, wR <sub>2</sub> = 0.0702             |
| Final R indexes [all data]                  | R <sub>1</sub> = 0.0320, wR <sub>2</sub> = 0.0717             |
| Largest diff. peak/hole / e Å <sup>-3</sup> | 0.14/-0.22                                                    |
| Flack parameter                             | 0.00(8)                                                       |

(c) X-ray structure of product **3cf**

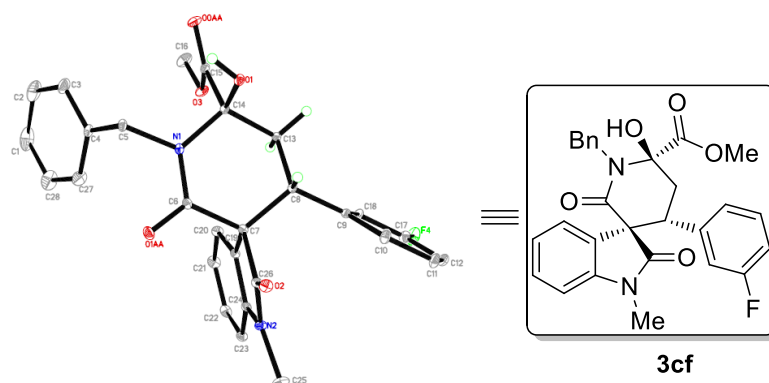

**Figure S3.** ORTEP diagram (30% probability) of **3cf**

A single crystal of **3cf** [C<sub>28</sub>H<sub>25</sub>FN<sub>2</sub>O<sub>5</sub>] was obtained from diffusion of hexane into a solution of **3cf** in DCM at room temperature. A suitable crystal of **3cf** was selected and analyzed by an Agilent Gemini X-ray Single Crystal Diffractometer. Using Olex2<sup>4</sup>, the structure was solved with the ShelXT<sup>5</sup> structure solution program using Direct Methods and refined with the ShelXL<sup>6</sup> refinement package using Least Squares minimization.

Refinement of the Flack parameter<sup>7</sup> for **3cf** was refined to the value of 0.11(7), which clearly suggests that the absolute configuration of the major isomer of **3cf** is (3*R*,4'*R*,6'*R*). Details of the crystal, data collection, and structure refinement parameters for crystallographic analysis of **3cf** are summarized in **Table S4**. Crystallographic data (CCDC 1963637) for **3cf** can be obtained free of charge from the Cambridge Crystallographic Data Centre via [www.ccdc.cam.ac.uk/data\\_request/cif](http://www.ccdc.cam.ac.uk/data_request/cif).

**Table S4.** Parameters for crystallographic analysis of **3cf**

|                     |                                                                |
|---------------------|----------------------------------------------------------------|
| Identification code | cu_20170324mf_0m-auto                                          |
| Empirical formula   | C <sub>28</sub> H <sub>25</sub> FN <sub>2</sub> O <sub>5</sub> |
| Formula weight      | 488.50                                                         |
| Temperature/K       | 273(2)                                                         |
| Crystal system      | orthorhombic                                                   |
| Space group         | P2 <sub>1</sub> 2 <sub>1</sub> 2 <sub>1</sub>                  |
| a/Å                 | 11.316(4)                                                      |
| b/Å                 | 11.859(4)                                                      |
| c/Å                 | 18.168(3)                                                      |
| α/°                 | 90                                                             |
| β/°                 | 90                                                             |
| γ/°                 | 90                                                             |

|                                             |                                                               |
|---------------------------------------------|---------------------------------------------------------------|
| Volume/Å <sup>3</sup>                       | 2438.0(11)                                                    |
| Z                                           | 4                                                             |
| $\rho_{\text{calc}}/\text{cm}^3$            | 1.331                                                         |
| $\mu/\text{mm}^{-1}$                        | 0.804                                                         |
| F(000)                                      | 1024                                                          |
| Radiation                                   | Cu K $\alpha$ ( $\lambda = 1.54178$ )                         |
| theta range for data collection/°           | 8.904 to 127.56                                               |
| Index ranges                                | $-13 \leq h \leq 13, -12 \leq k \leq 13, -21 \leq l \leq 21$  |
| Reflections collected                       | 14025                                                         |
| Independent reflections                     | 3990 [ $R_{\text{int}} = 0.0282, R_{\text{sigma}} = 0.0257$ ] |
| Data/restraints/parameters                  | 3990/0/328                                                    |
| Goodness-of-fit on $F^2$                    | 1.152                                                         |
| Final R indexes [ $I \geq 2\sigma(I)$ ]     | $R_1 = 0.0362, wR_2 = 0.0983$                                 |
| Final R indexes [all data]                  | $R_1 = 0.0421, wR_2 = 0.1076$                                 |
| Largest diff. peak/hole / e Å <sup>-3</sup> | 0.37/-0.33                                                    |
| Flack parameter                             | 0.11(7)                                                       |

---

## 8. References

- [1] Zhao, H.; Zhang, Z.; Lu, W.; Han, P.; Wang, W.; Jing, L., *Tetrahedron Lett.*, 2021, **83**, 153426.
- [2] a) Hua, Y.-Z.; Liu, M.-M.; Huang, P.-J.; Song, X.; Wang, M.-C.; Chang, J.-B. *Chem. Eur. J.* **2015**, *21*, 11994-11998; b) Li, B.-S.; Wang, Y.; Proctor, R. S. J.; Zhang, Y.; Webster, R. D.; Yang, S.; Song, B.; Chi, Y. R. *Nat. Commun.* **2016**, *7*, 12933; c) Juste-Navarro, V.; Marqués-López, E.; Herrera, R. P., Thiourea-catalyzed addition of indoles to aliphatic  $\beta,\gamma$ -unsaturated  $\alpha$ -ketoesters. *Asian J. Org. Chem.* **2015**, *4*, 884-889; d) n, K. H.; Bartenschlager, R.; Klein, C. D., Synthesis and biological evaluation of alpha-ketoamides as inhibitors of the Dengue virus protease with antiviral activity in cell-culture. *Bioorg. Med. Chem.* **2011**, *19*, 4067-4074.
- [3] a) Vakulya, B.; Varga, S.; Csánpai, A.; Soós, T. *Org. Lett.* **2005**, *7*, 1967-969; b) Ye, J.; Dixon, D. J.; Hynes, P. S. *Chem. Commun.* **2005**, 4481-4483; c) Jiang, X.; Zhang, Y.; Liu, X.; Zhang, G.; Lai, L.; Wu, L.; Zhang, J.; Wang, R. *J. Org. Chem.* **2009**, *74*, 5562-5567; d) Asano, K.; Matsubara, S. *J. Am. Chem. Soc.* **2011**, *133*, 16711-16713; e) Mayr, F.; Brimiouille, R.; Bach, T. *J. Org. Chem.* **2016**, *81*, 6965-6971.
- [4] a) Yang, W.; Du, D.-M. *Org. Lett.* **2010**, *12*, 5450-5453; b) Dong, Z.; Qiu, G.; Zhou, H.-B.; Dong, C. *Tetrahedron: Asymmetry* **2012**, *23*, 1550-1556; c) Xie, X.; Jing, L.; Qin, D.; He, W.; Wu, S.; Jin, L.; Luo, G. *RSC Adv.* **2014**, *4*, 11605-11609; d) Rao, K. S.; Ramesh, P.; Trivedi, R.; Kantam, M. L. *Tetrahedron Lett.* **2016**, *57*, 1227.
- [5] Dolomanov, O. V.; Bourhis, L. J.; Gildea, R. J.; Howard, J. A. K.; Puschmann, H. *J. Appl. Crystallogr.* **2009**, *42*, 339.
- [6] Sheldrick, G. M. *Acta Crystallogr. Sect. A* **2015**, *71*, 3.
- [7] Sheldrick, G. M. *Acta Crystallogr. Sect. C* **2015**, *71*, 3.
- [8] Flack, H. D. *Acta Crystallogr. Sect. A* **1983**, *39*, 876.

## 9. NMR spectra

### C7, $^1\text{H}$ NMR (400 MHz, $\text{DMSO-}d_6$ ):

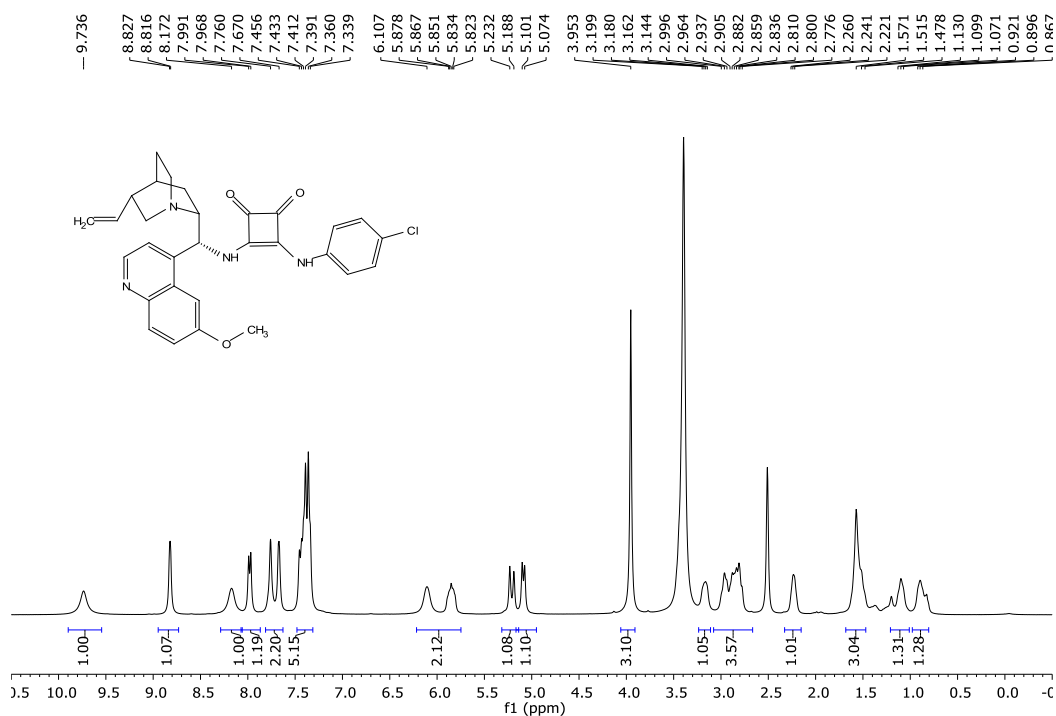

### C7, $^{13}\text{C}$ NMR (100 MHz, $\text{DMSO-}d_6$ ):

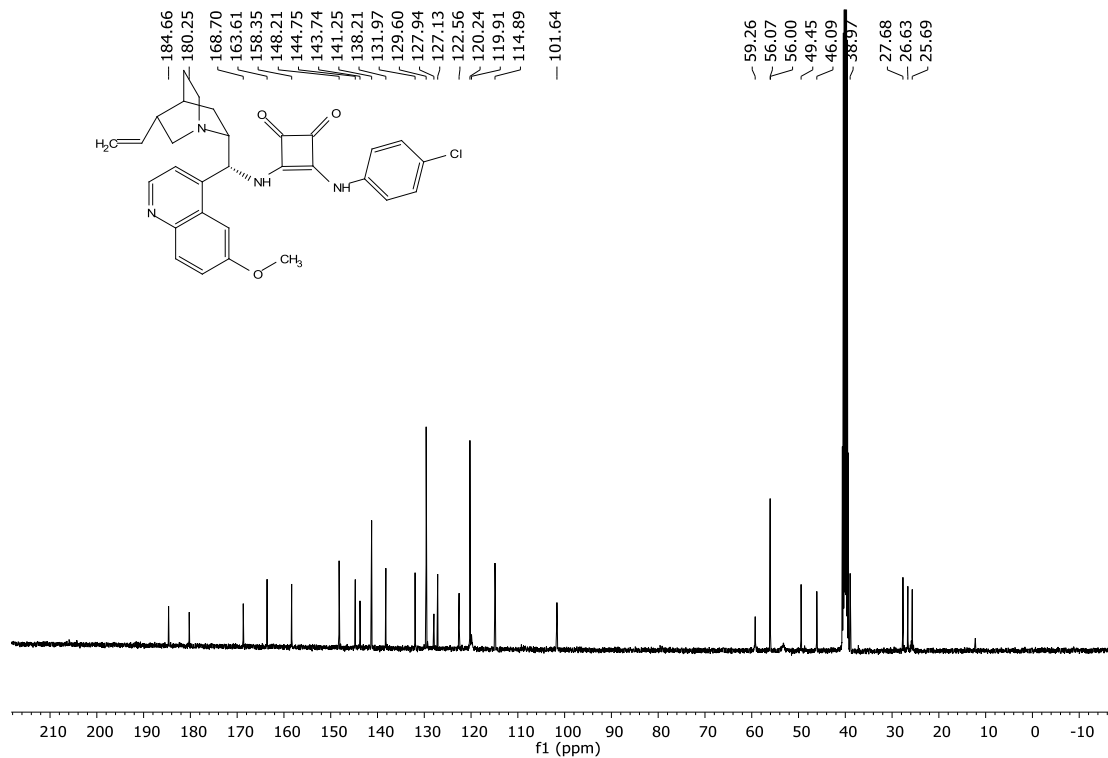

### 11, <sup>1</sup>H NMR (400 MHz, DMSO-d<sub>6</sub>)

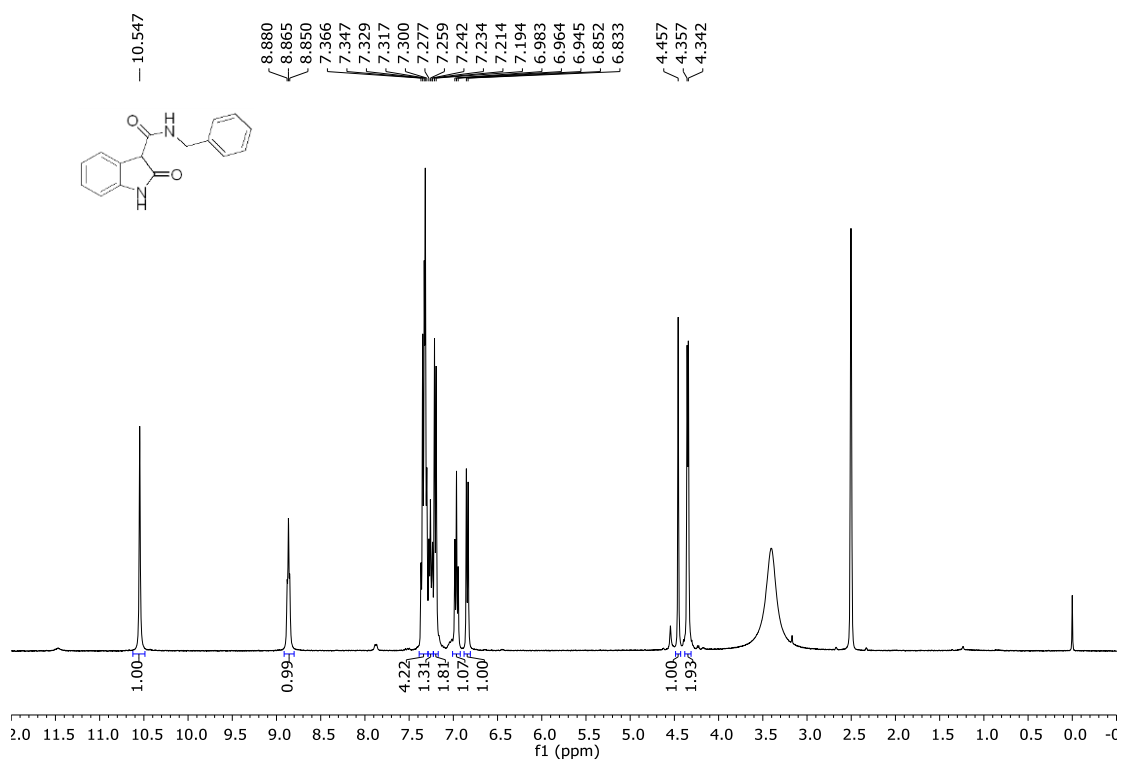

### 11, <sup>13</sup>C NMR (100 MHz, DMSO-d<sub>6</sub>):

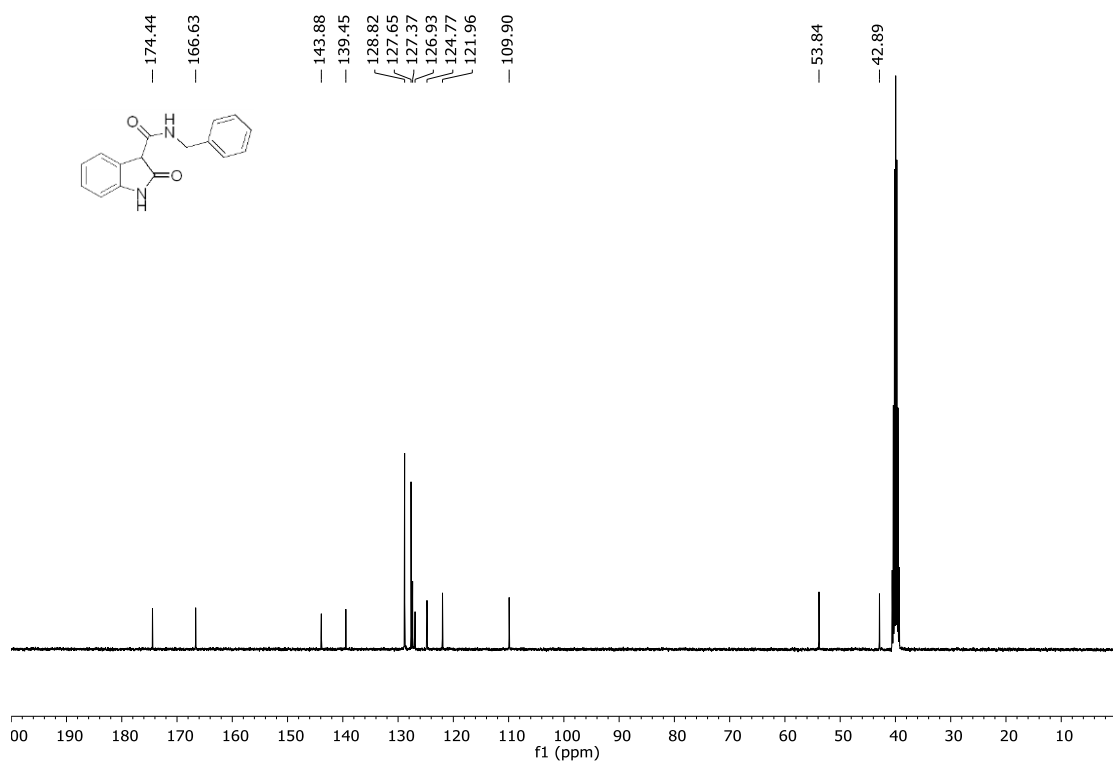

**1m, <sup>1</sup>H NMR (400 MHz, CDCl<sub>3</sub>):**

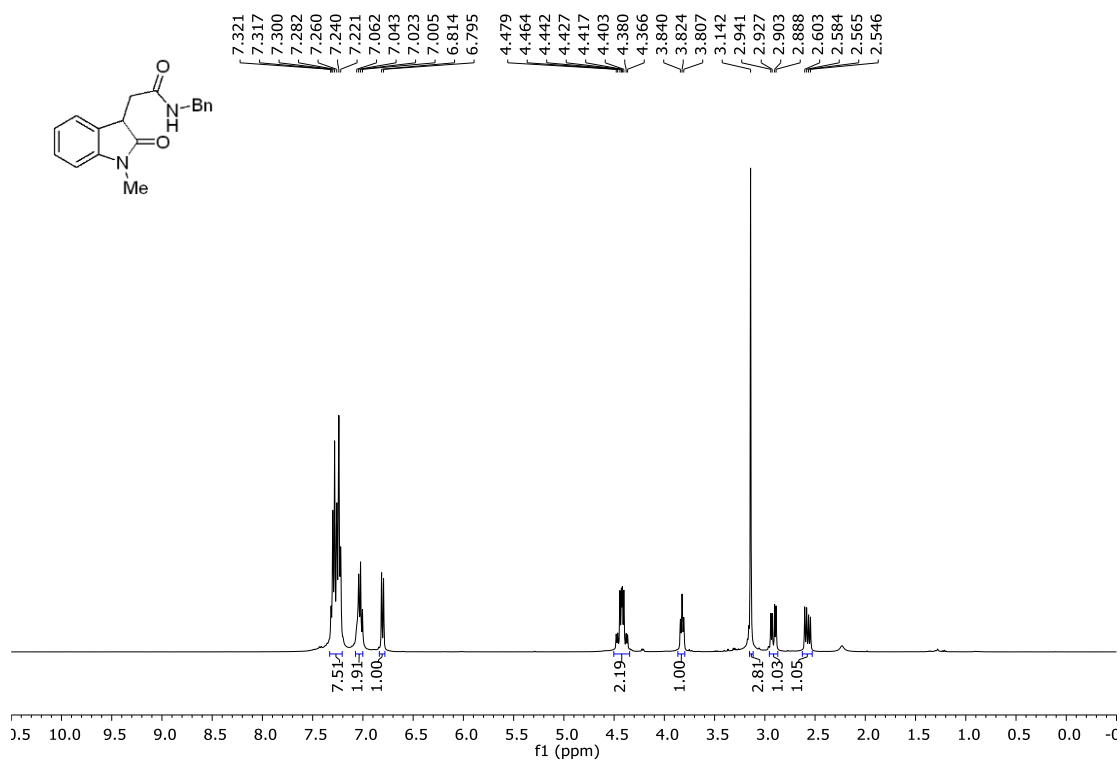

**1m, <sup>13</sup>C NMR (100 MHz, CDCl<sub>3</sub>):**

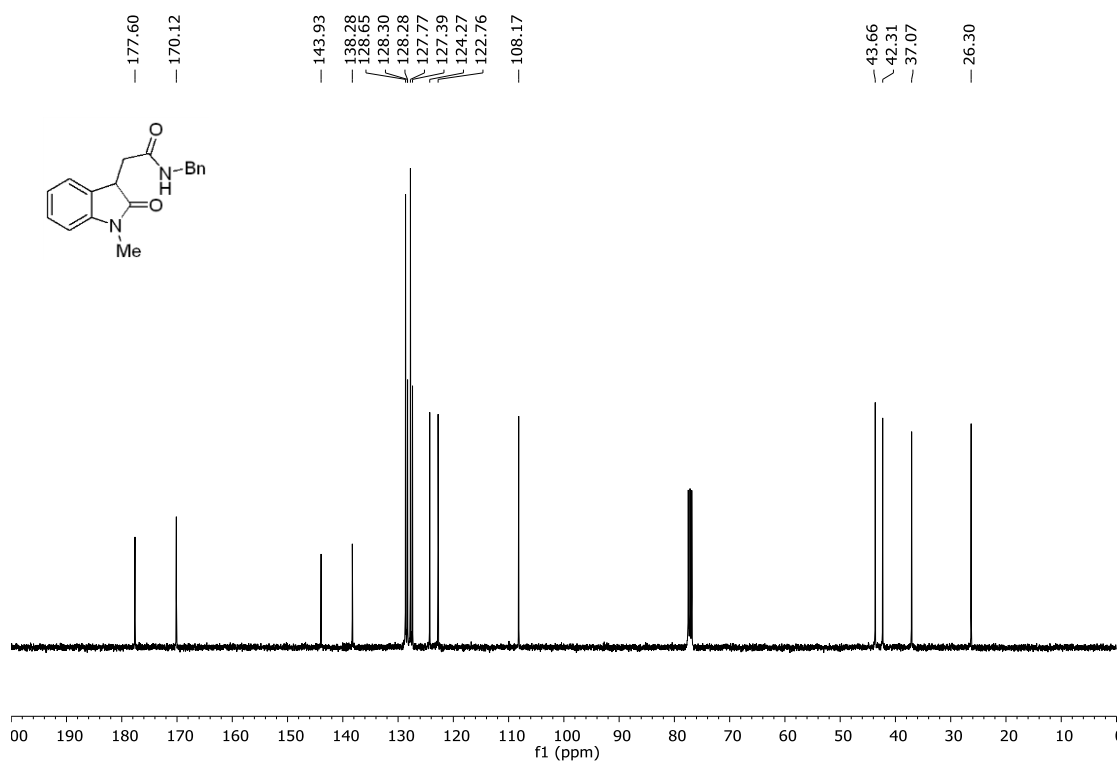



**3aa, <sup>1</sup>H NMR (400 MHz, CDCl<sub>3</sub>):**

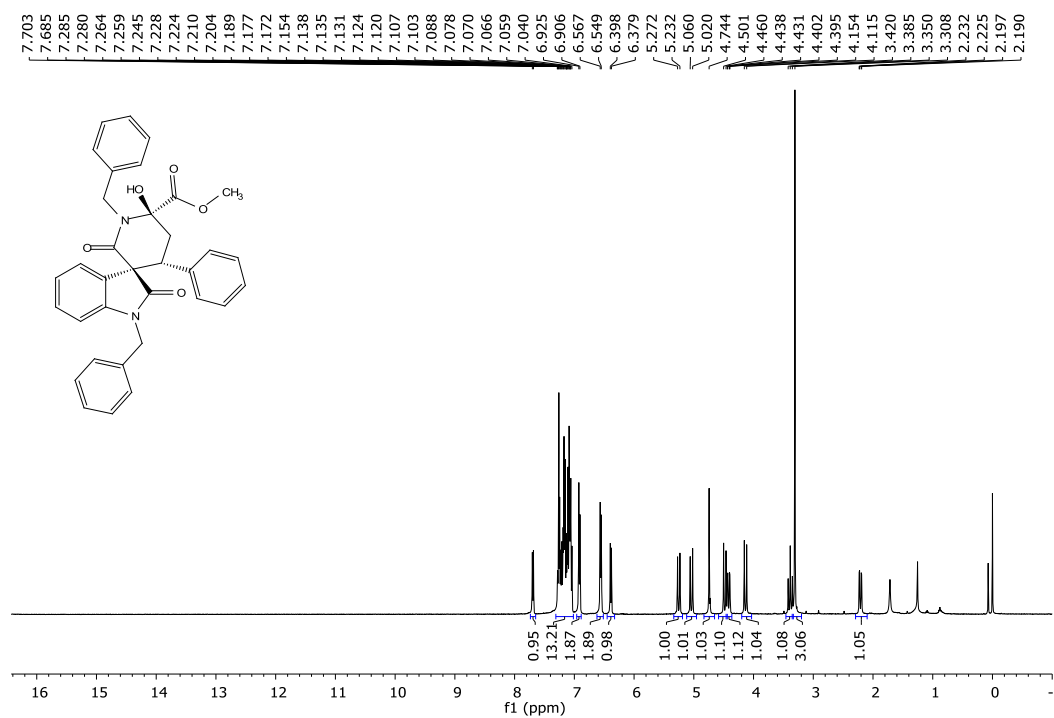

**3aa, <sup>13</sup>C NMR (100 MHz, CDCl<sub>3</sub>):**

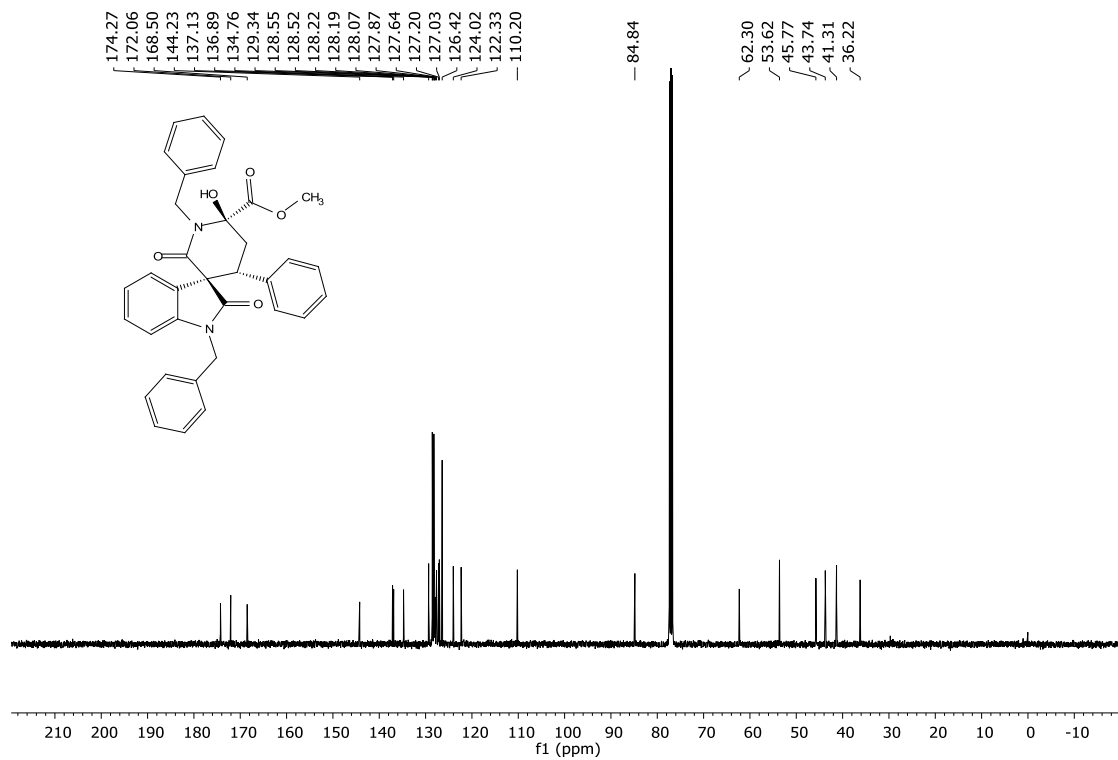

**3ba, <sup>1</sup>H NMR (400 MHz, CDCl<sub>3</sub>):**

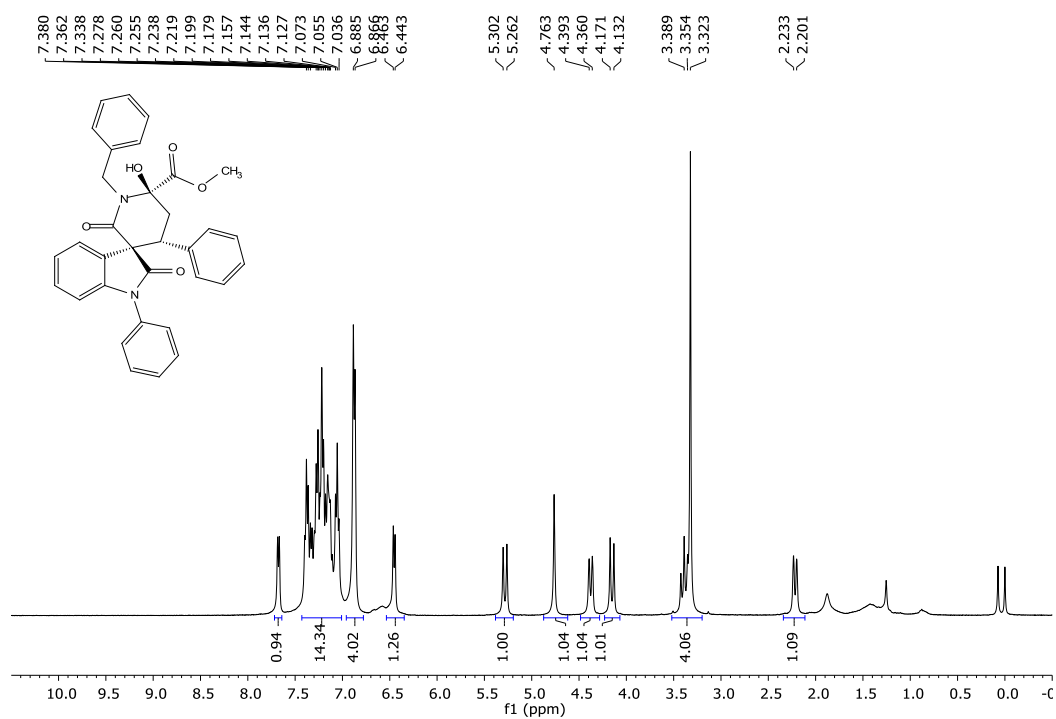

**3ba, <sup>13</sup>C NMR (100 MHz, CDCl<sub>3</sub>):**

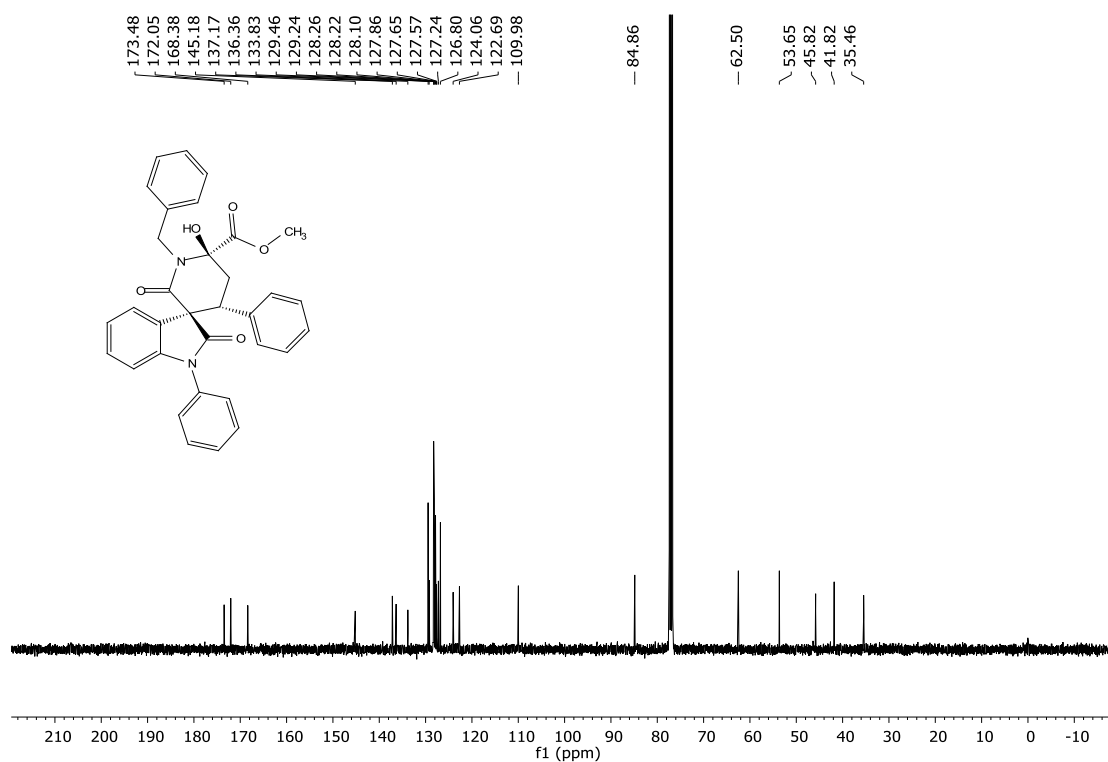

**3ca, <sup>1</sup>H NMR (400 MHz, CDCl<sub>3</sub>):**

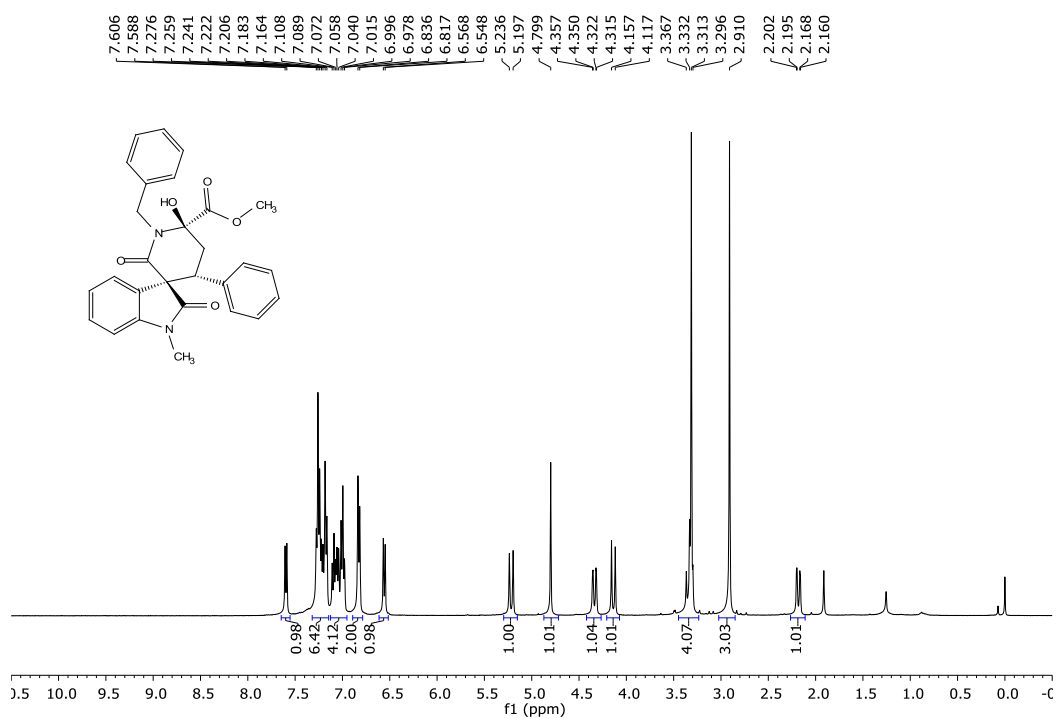

**3ca, <sup>13</sup>C NMR (100 MHz, CDCl<sub>3</sub>):**

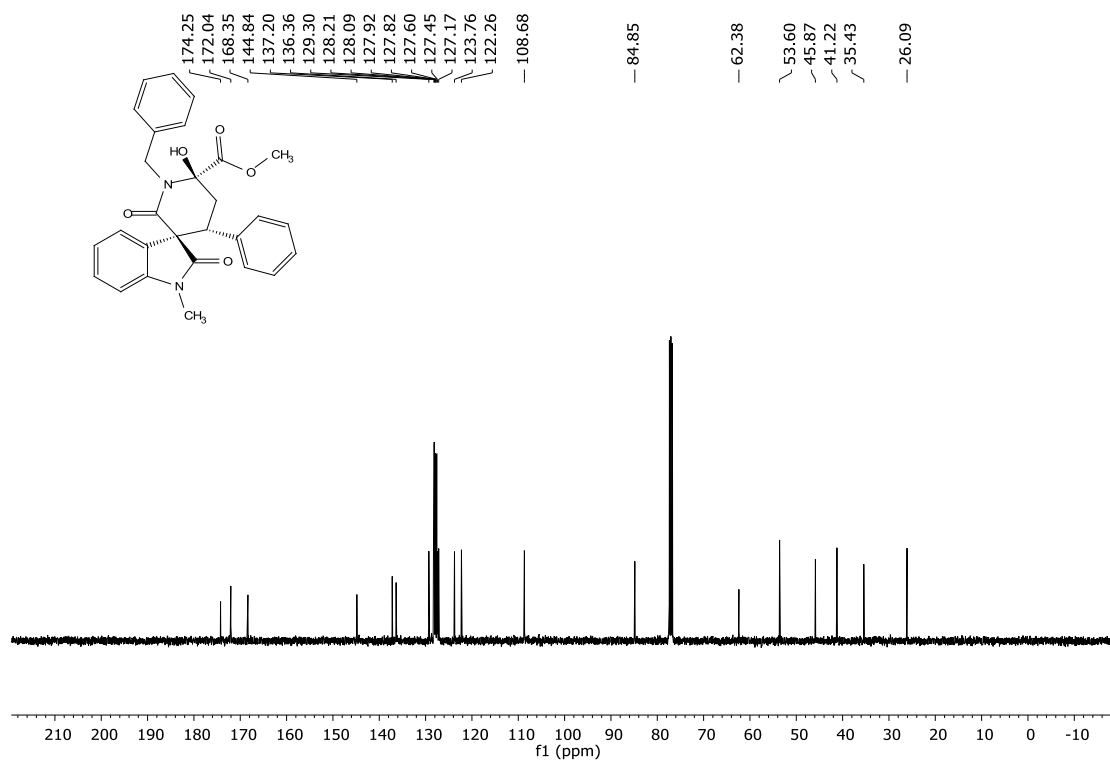

**3da, <sup>1</sup>H NMR (400 MHz, CDCl<sub>3</sub>):**

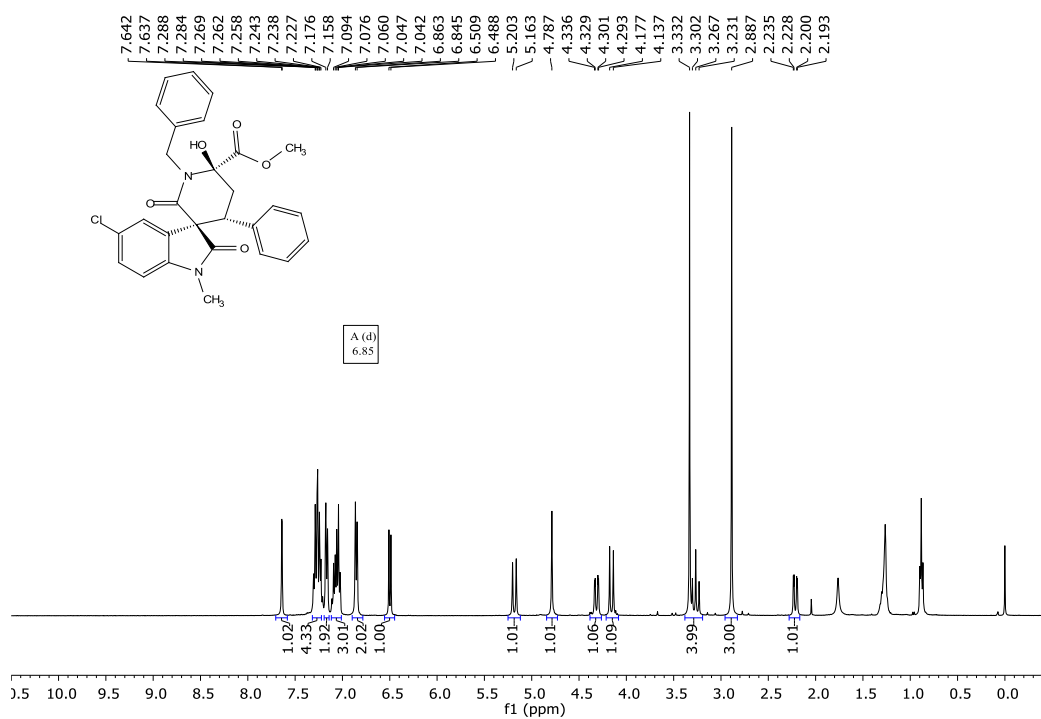

**3da, <sup>13</sup>C NMR (100 MHz, CDCl<sub>3</sub>):**

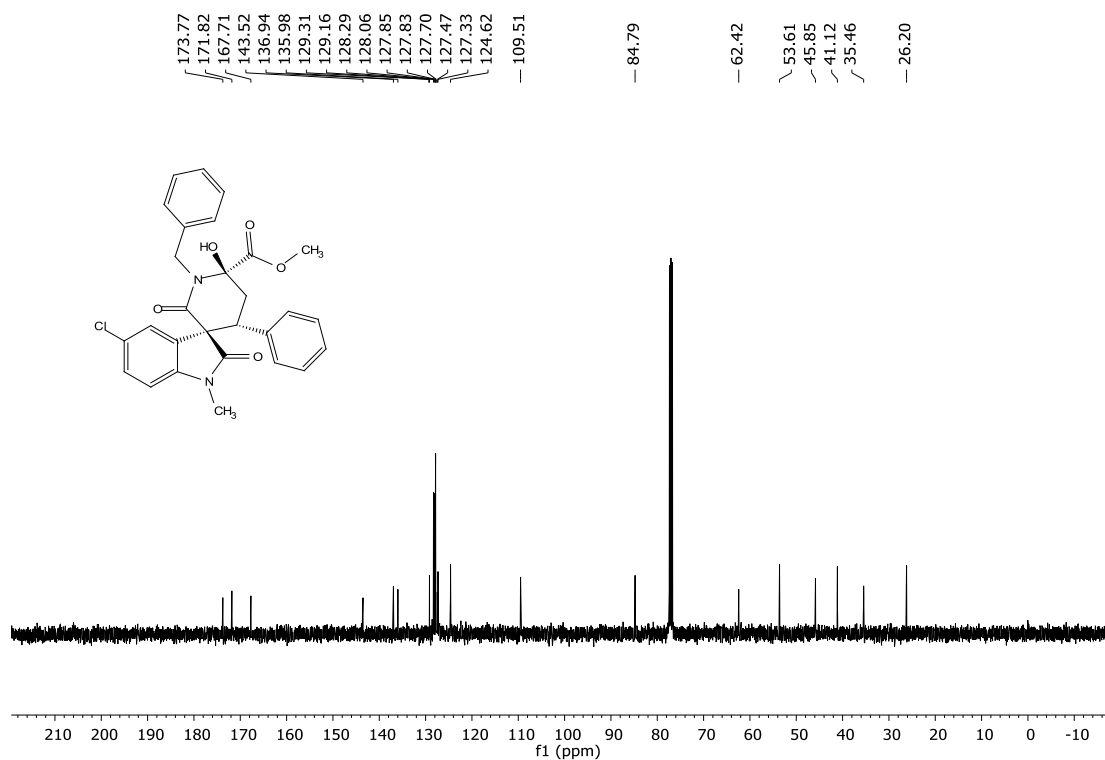

**3ea,  $^1\text{H}$  NMR (400 MHz,  $\text{CDCl}_3$ ):**

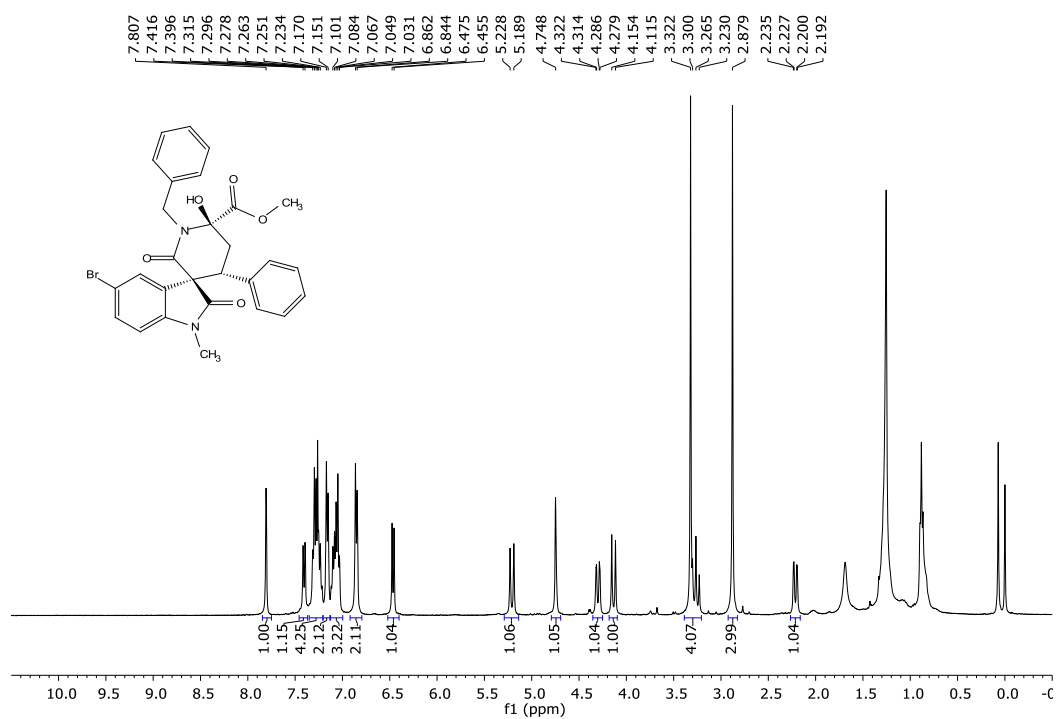

**3ea,  $^{13}\text{C}$  NMR (100 MHz,  $\text{CDCl}_3$ ):**

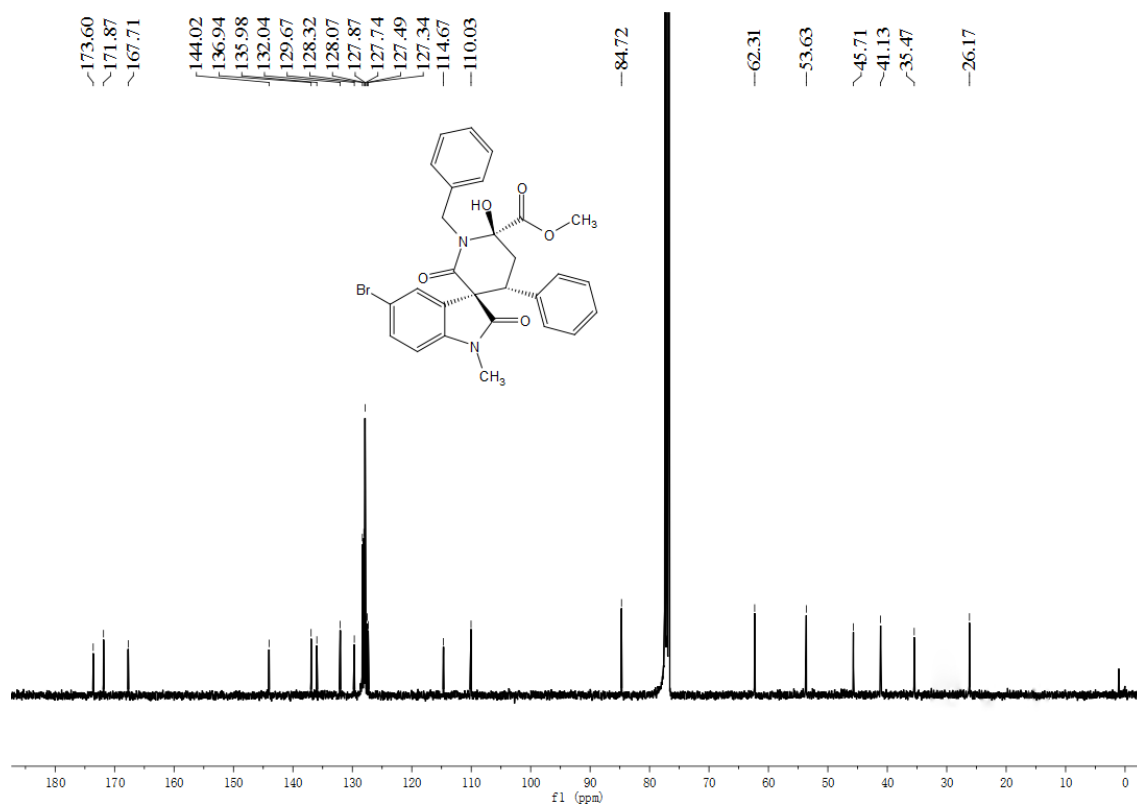

**3fa,  $^1\text{H}$  NMR (400 MHz,  $\text{CDCl}_3$ ):**

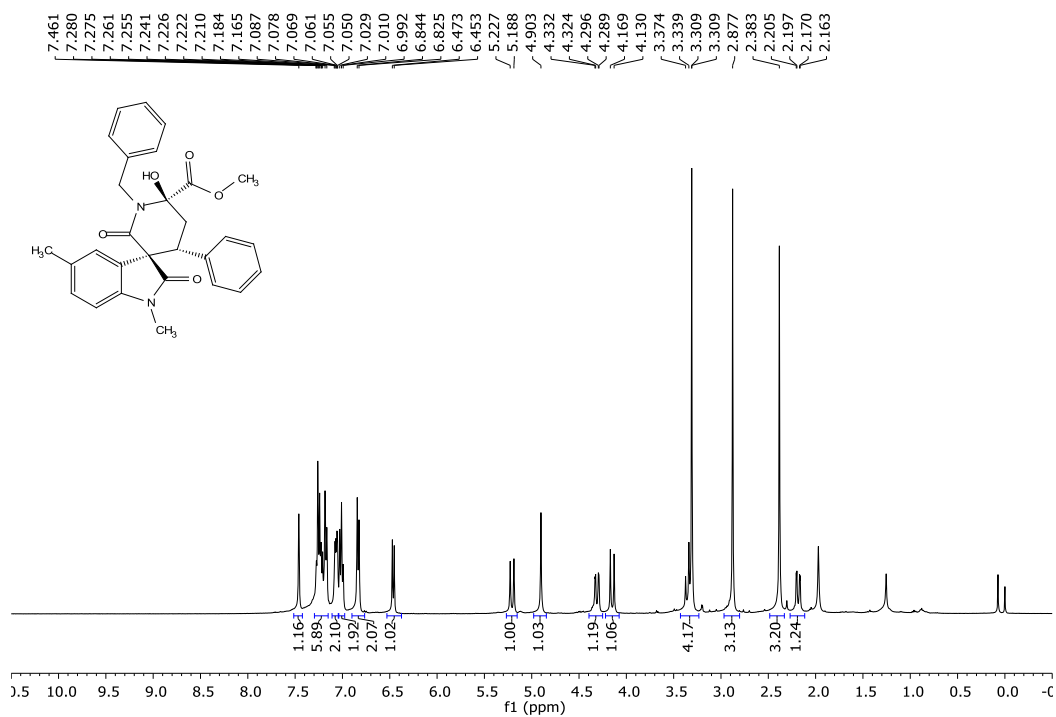

**3fa,  $^{13}\text{C}$  NMR (100 MHz,  $\text{CDCl}_3$ ):**

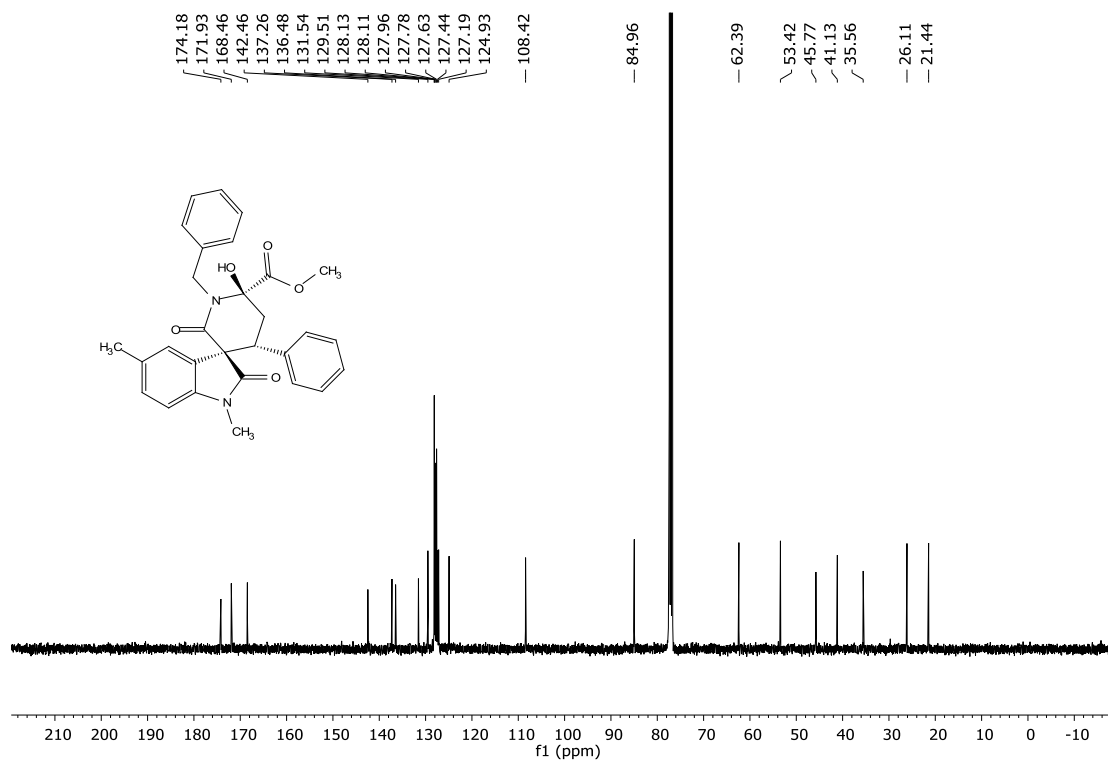

**3ga, <sup>1</sup>H NMR (400 MHz, CDCl<sub>3</sub>):**

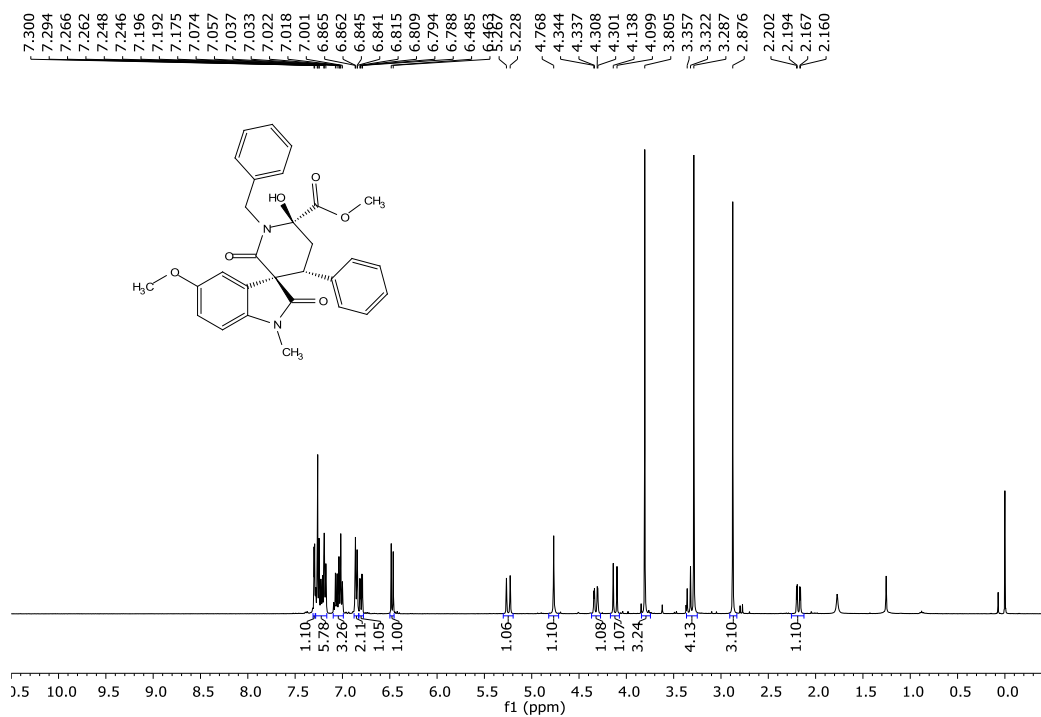

**3ga, <sup>13</sup>C NMR (100 MHz, CDCl<sub>3</sub>):**

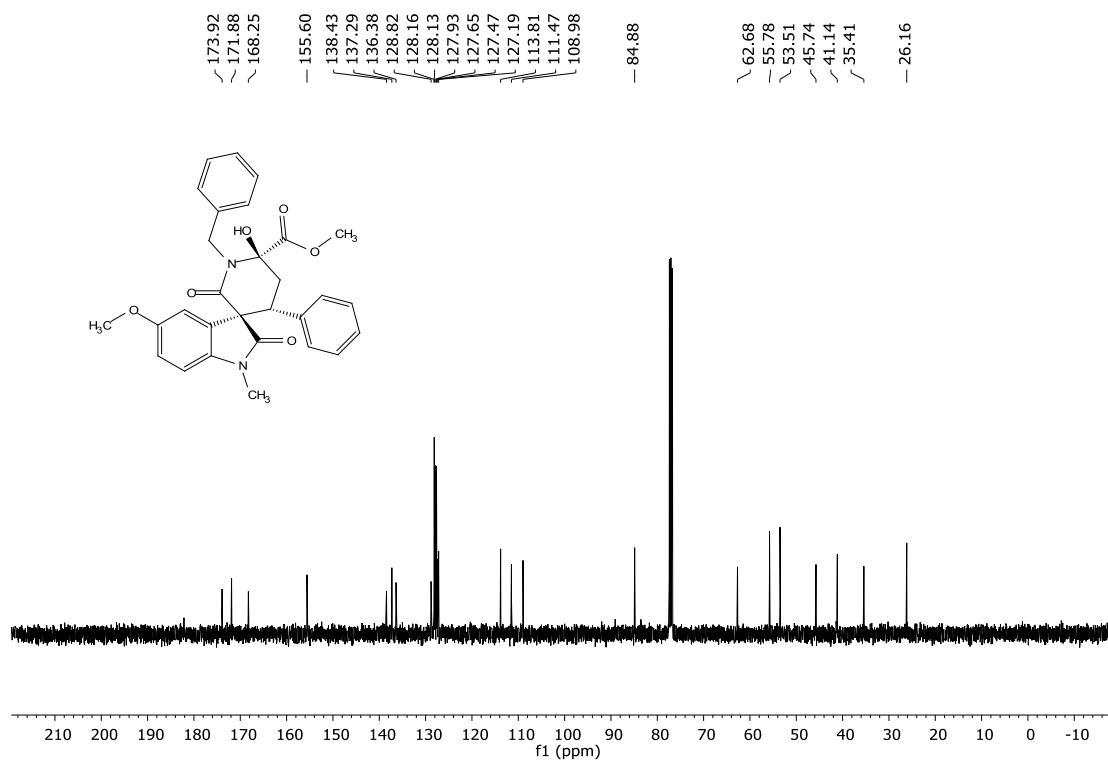

**3ha, <sup>1</sup>H NMR (400 MHz, CDCl<sub>3</sub>):**

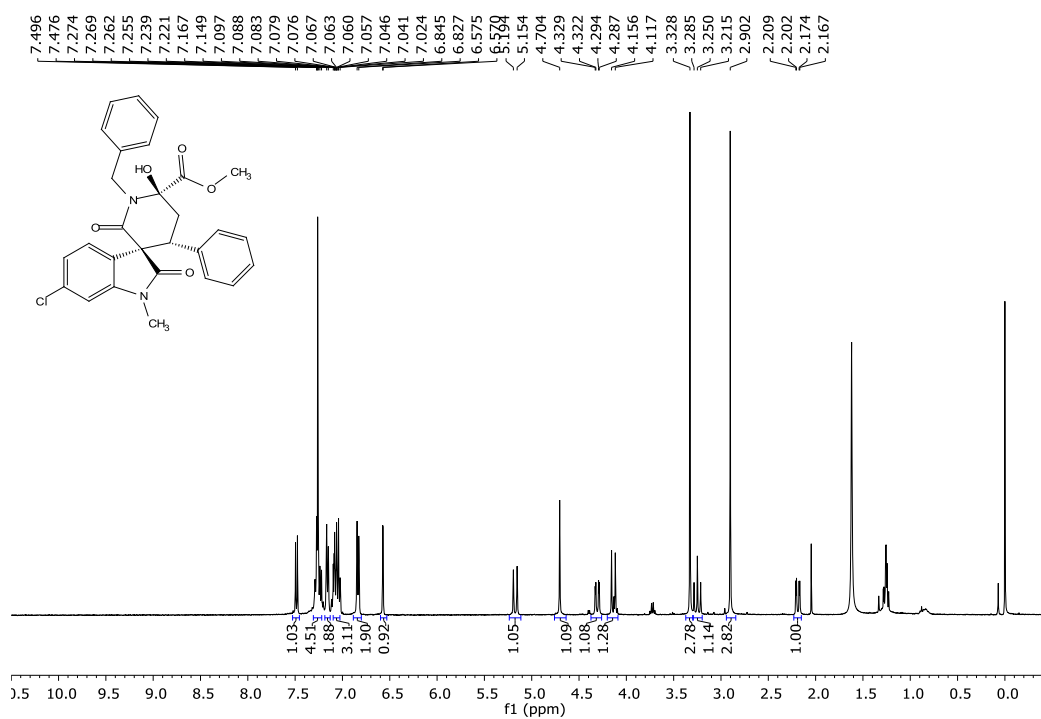

**3ha, <sup>13</sup>C NMR (100 MHz, CDCl<sub>3</sub>):**

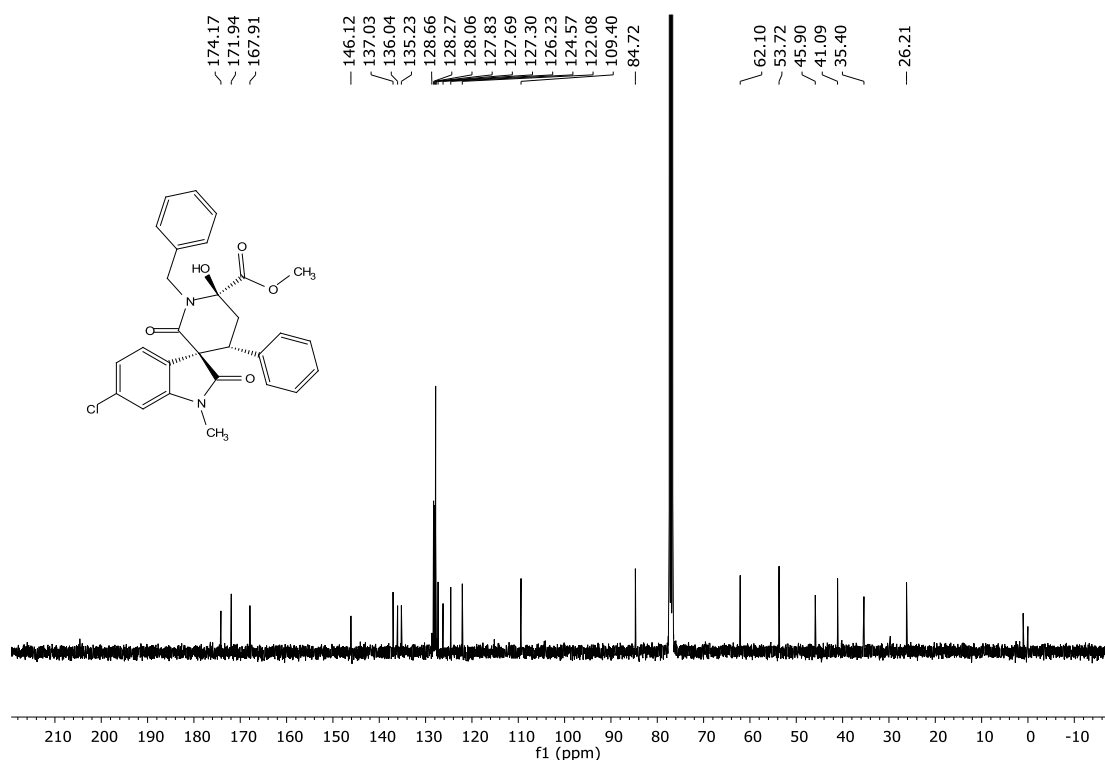



**3ia,  $^1\text{H}$  NMR (400 MHz,  $\text{CDCl}_3$ ):**

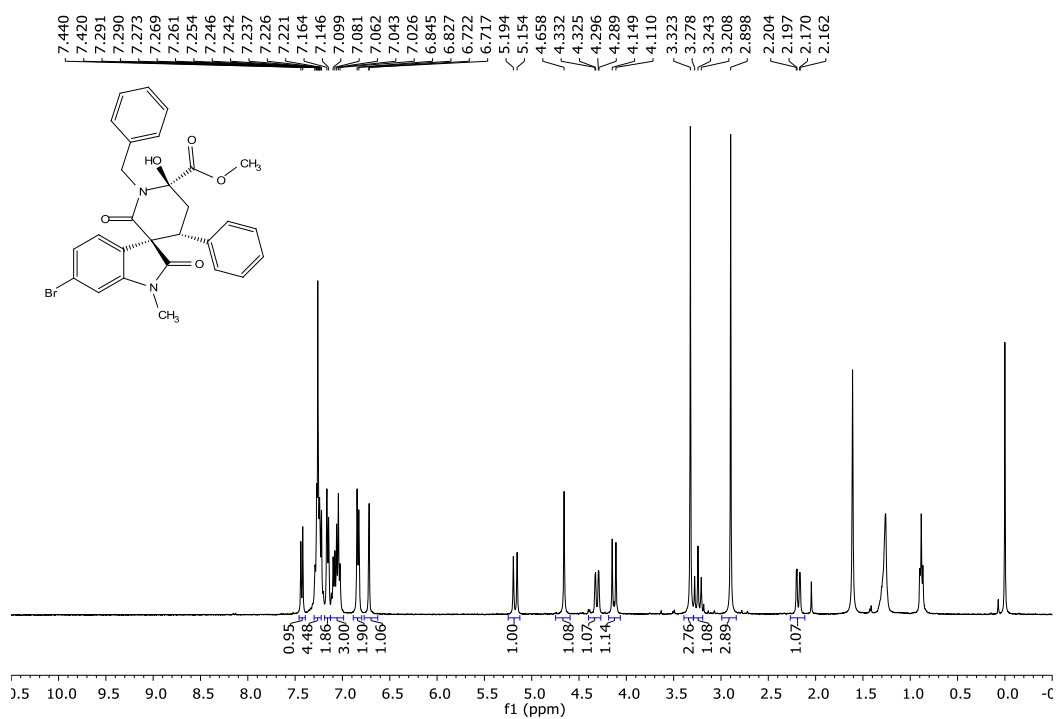

**3ia,  $^{13}\text{C}$  NMR (100 MHz,  $\text{CDCl}_3$ ):**

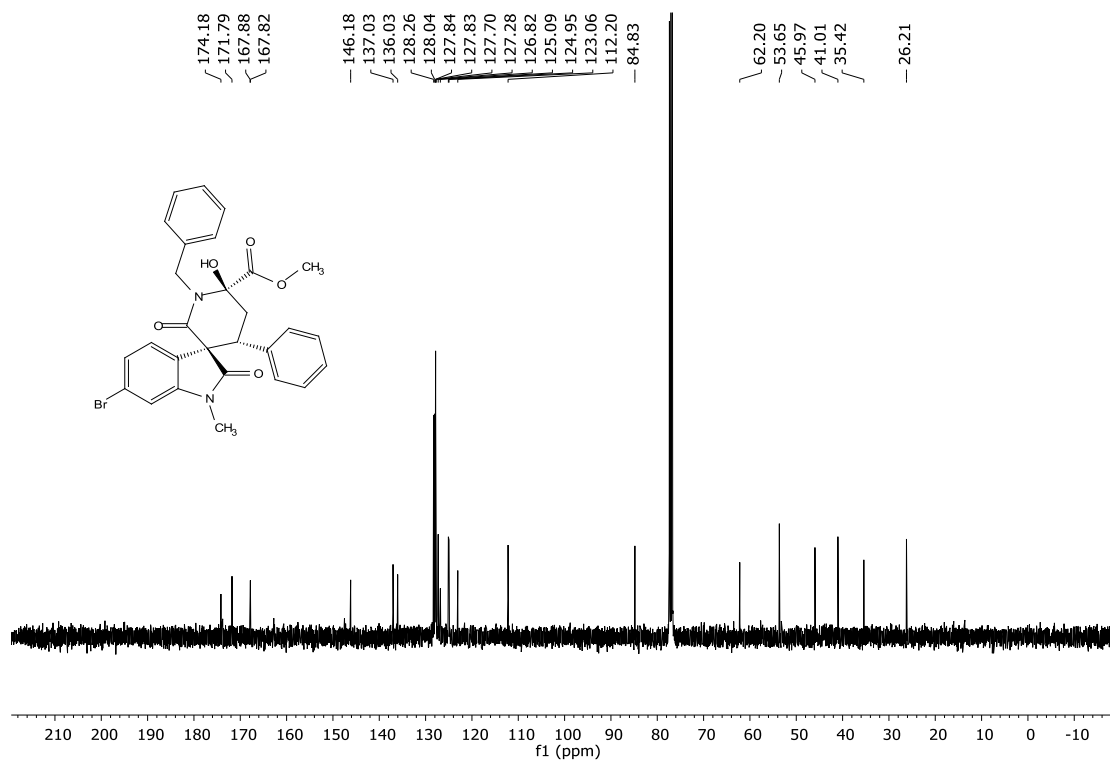

**3ja,  $^1\text{H}$  NMR (400 MHz,  $\text{CDCl}_3$ ):**

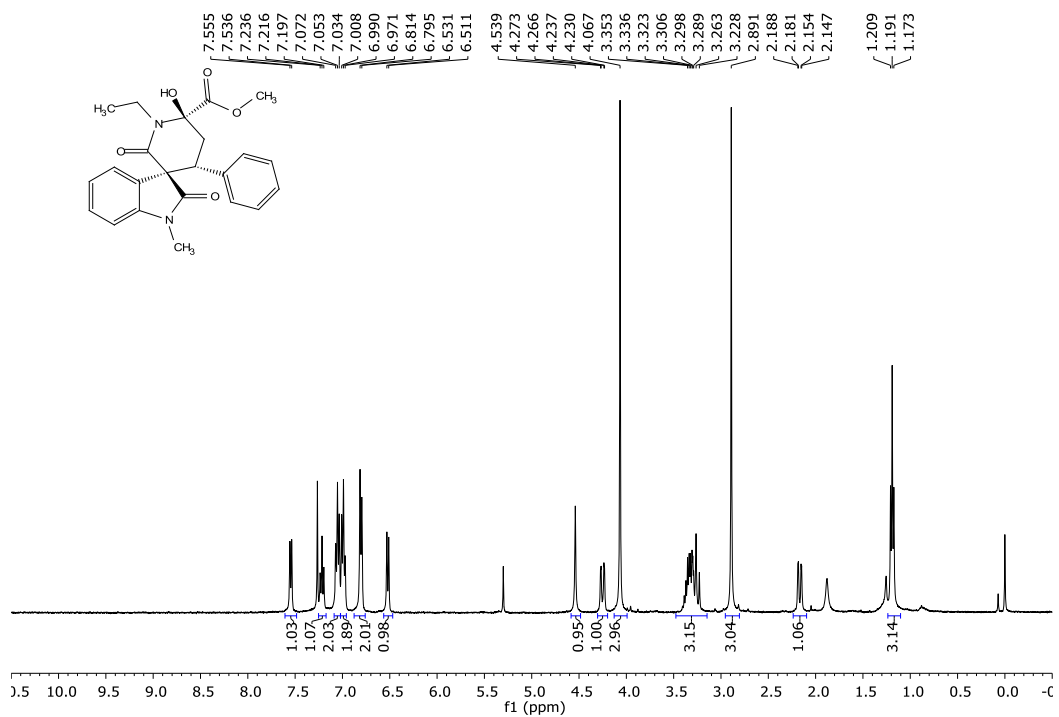

**3ja,  $^{13}\text{C}$  NMR (100 MHz,  $\text{CDCl}_3$ ):**

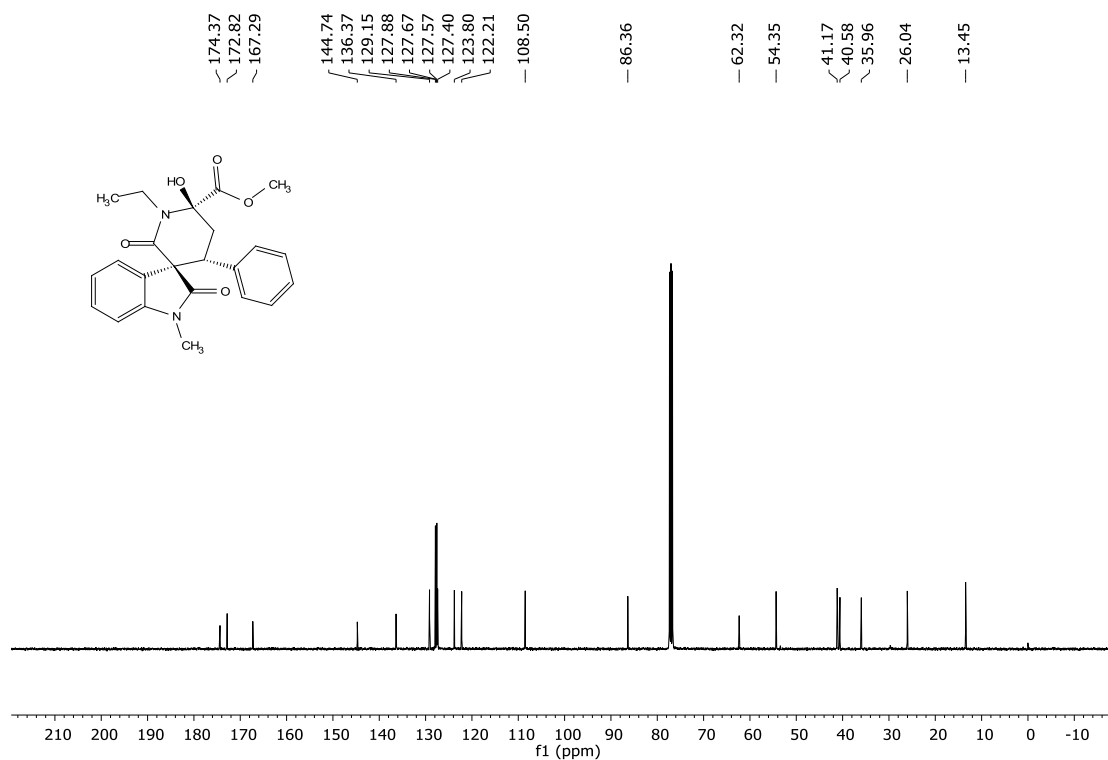

**3cb, <sup>1</sup>H NMR (400 MHz, CDCl<sub>3</sub>):**

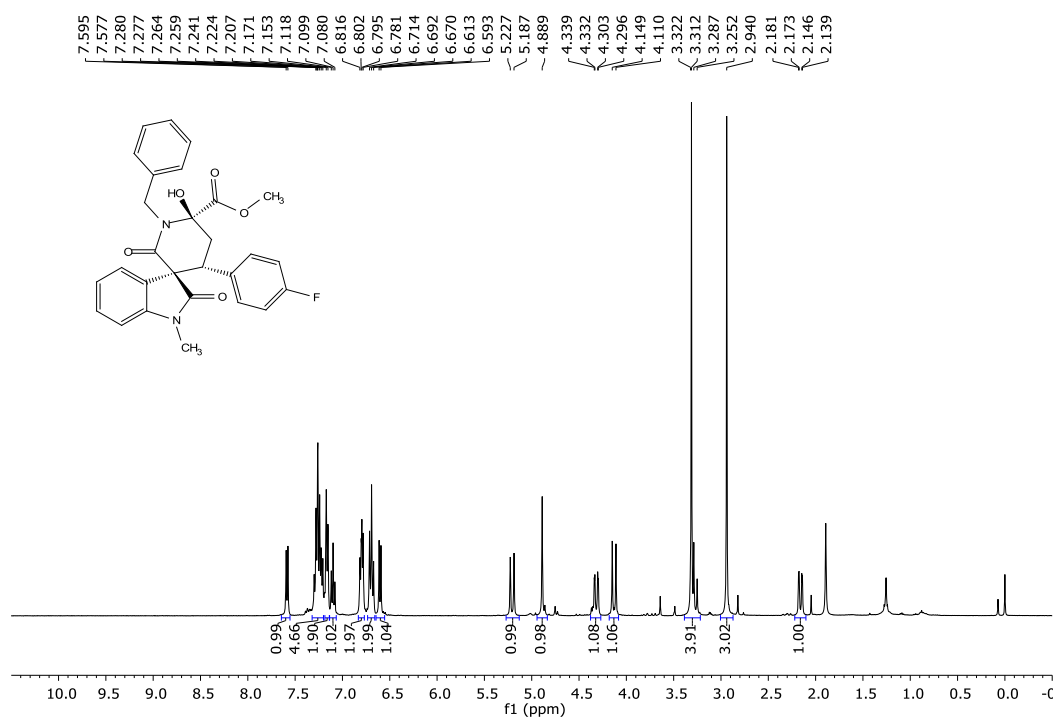

**3cb, <sup>13</sup>C NMR (100 MHz, CDCl<sub>3</sub>):**

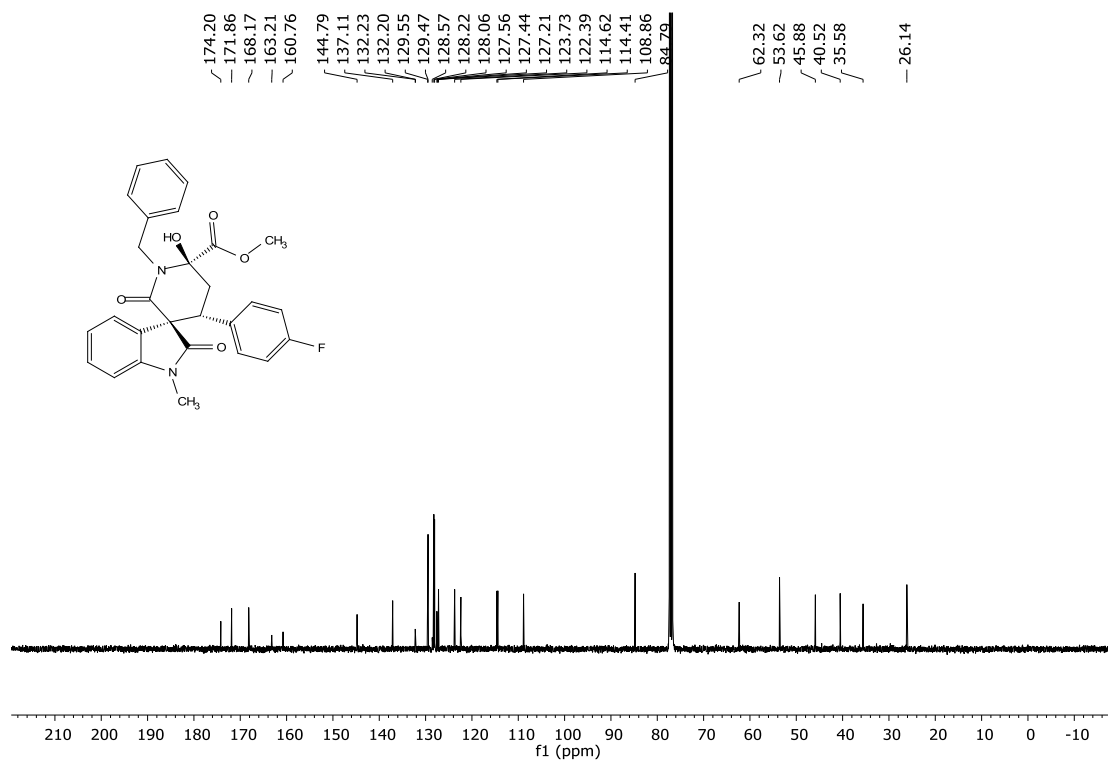

3cc,  $^1\text{H}$  NMR (400 MHz,  $\text{CDCl}_3$ ):

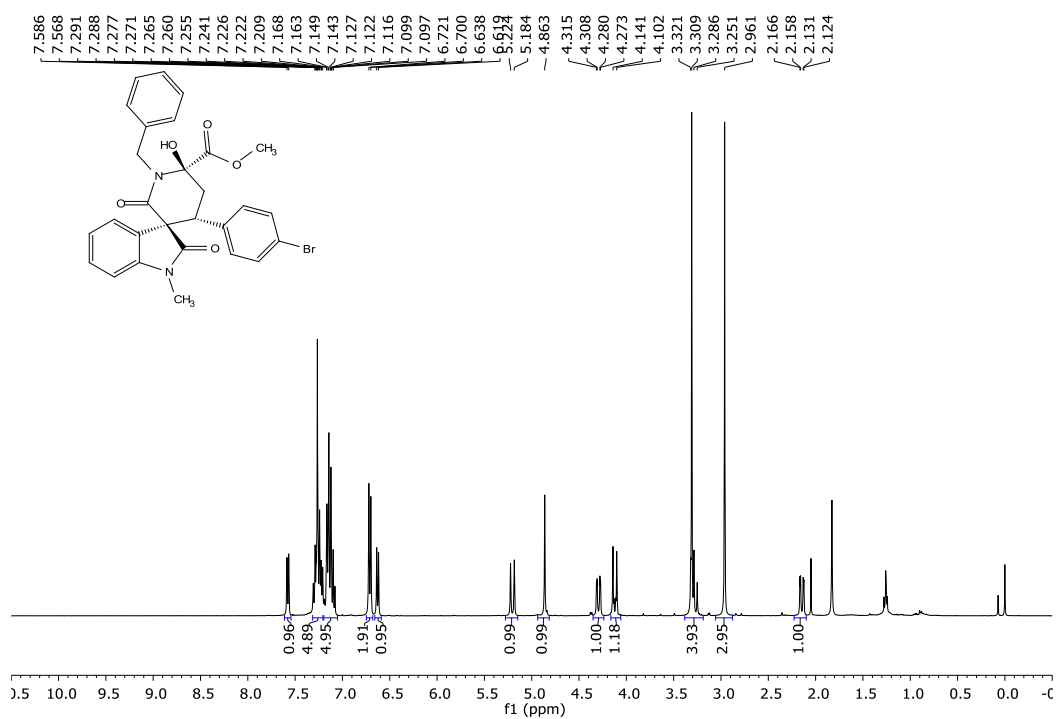

3cc,  $^{13}\text{C}$  NMR (100 MHz,  $\text{CDCl}_3$ ):

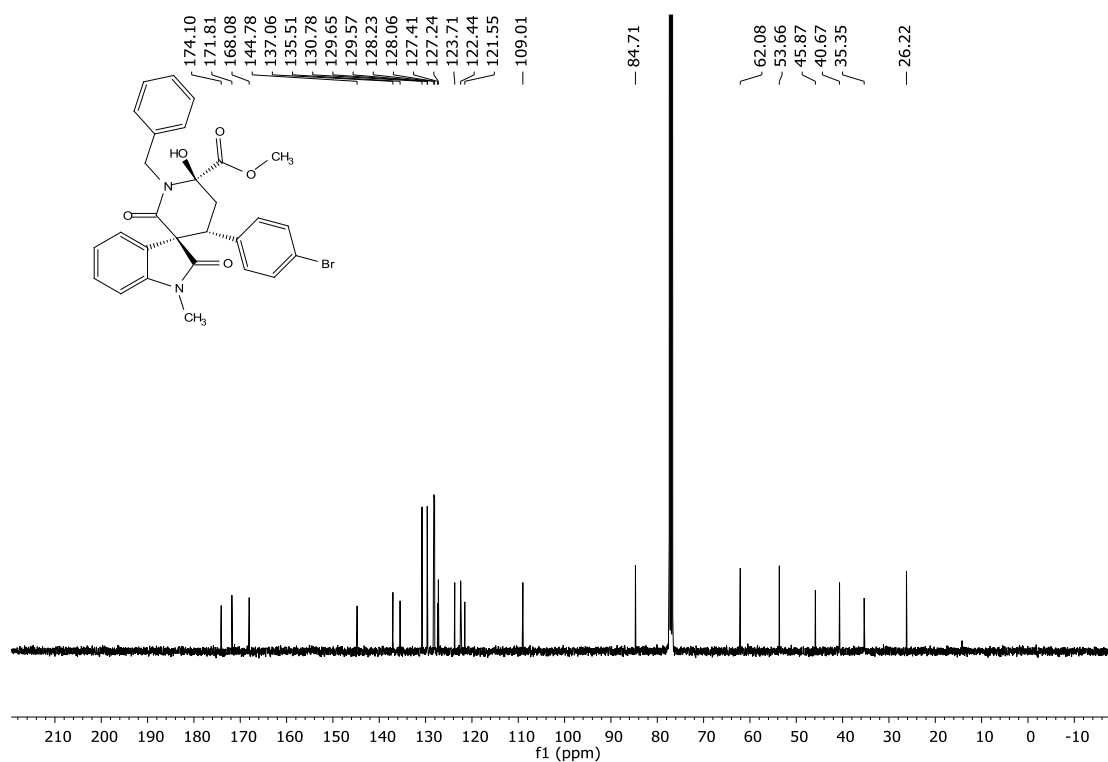

**3cd, <sup>1</sup>H NMR (400 MHz, CDCl<sub>3</sub>):**

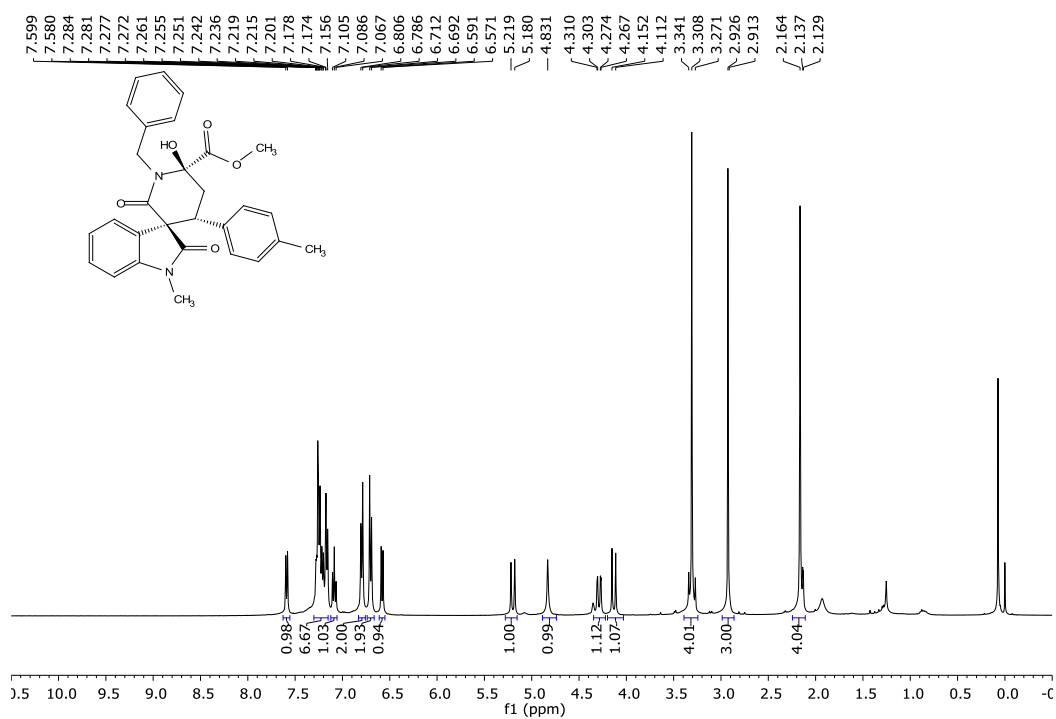

**3cd, <sup>13</sup>C NMR (100 MHz, CDCl<sub>3</sub>):**

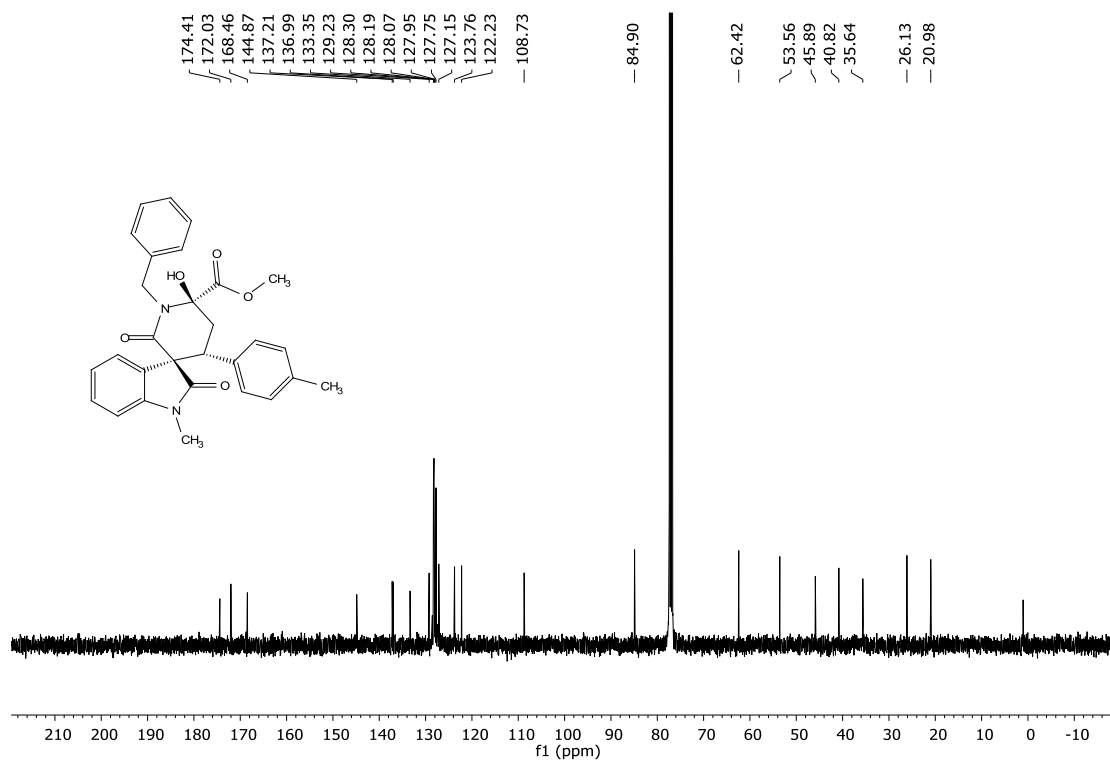

**3ce, <sup>1</sup>H NMR (400 MHz, CDCl<sub>3</sub>):**

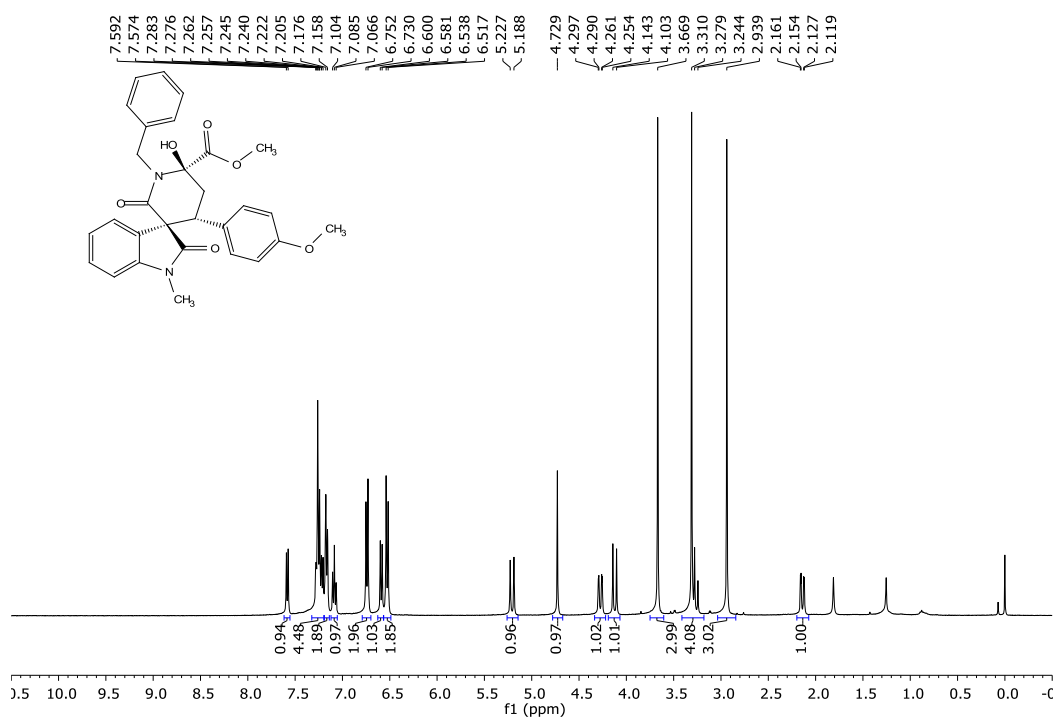

**3ce, <sup>13</sup>C NMR (100 MHz, CDCl<sub>3</sub>):**

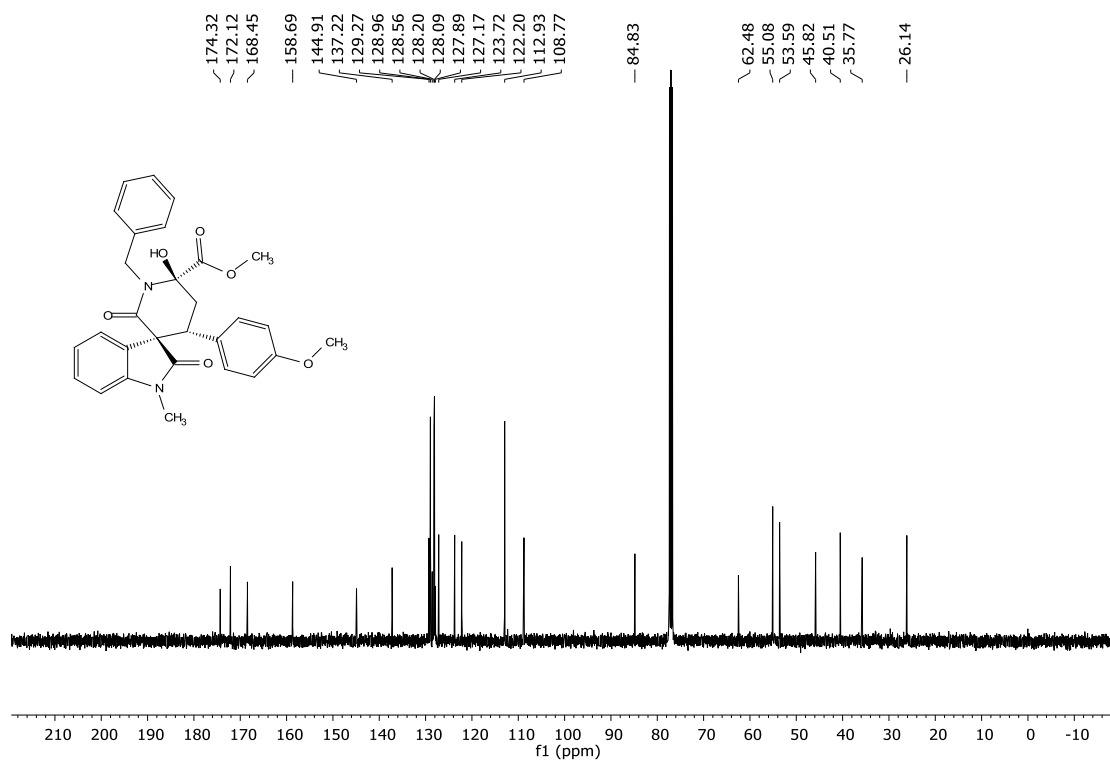

**3cf,  $^1\text{H}$  NMR (400 MHz,  $\text{DMSO-}d_6$ ):**

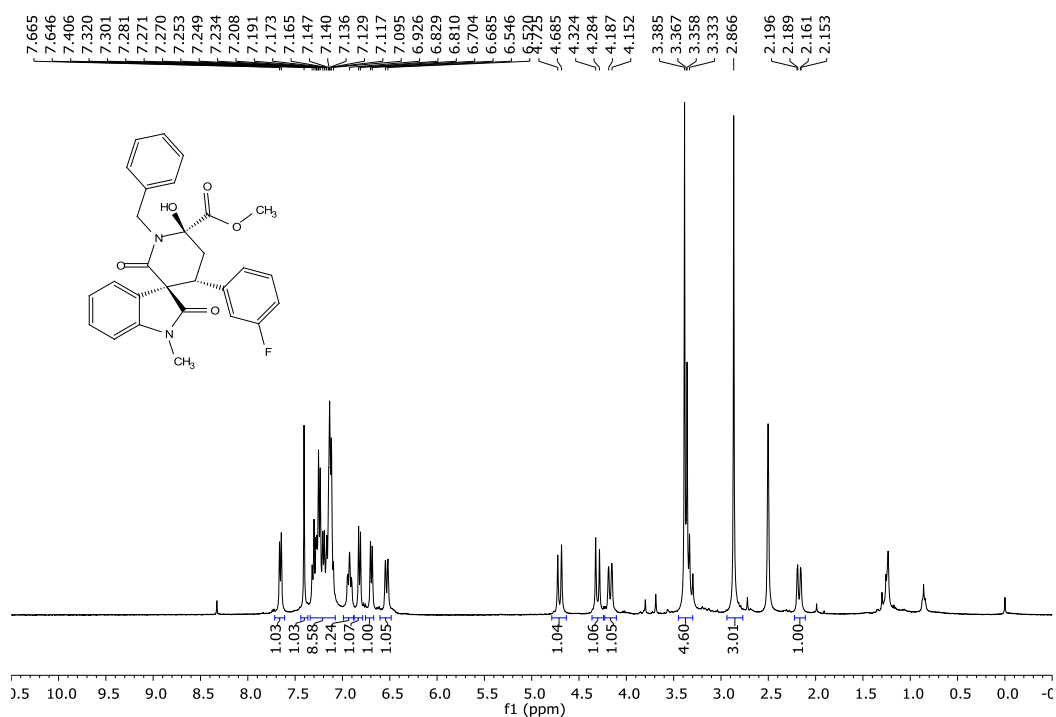

**3cf,  $^{13}\text{C}$  NMR (100 MHz,  $\text{DMSO-}d_6$ ):**

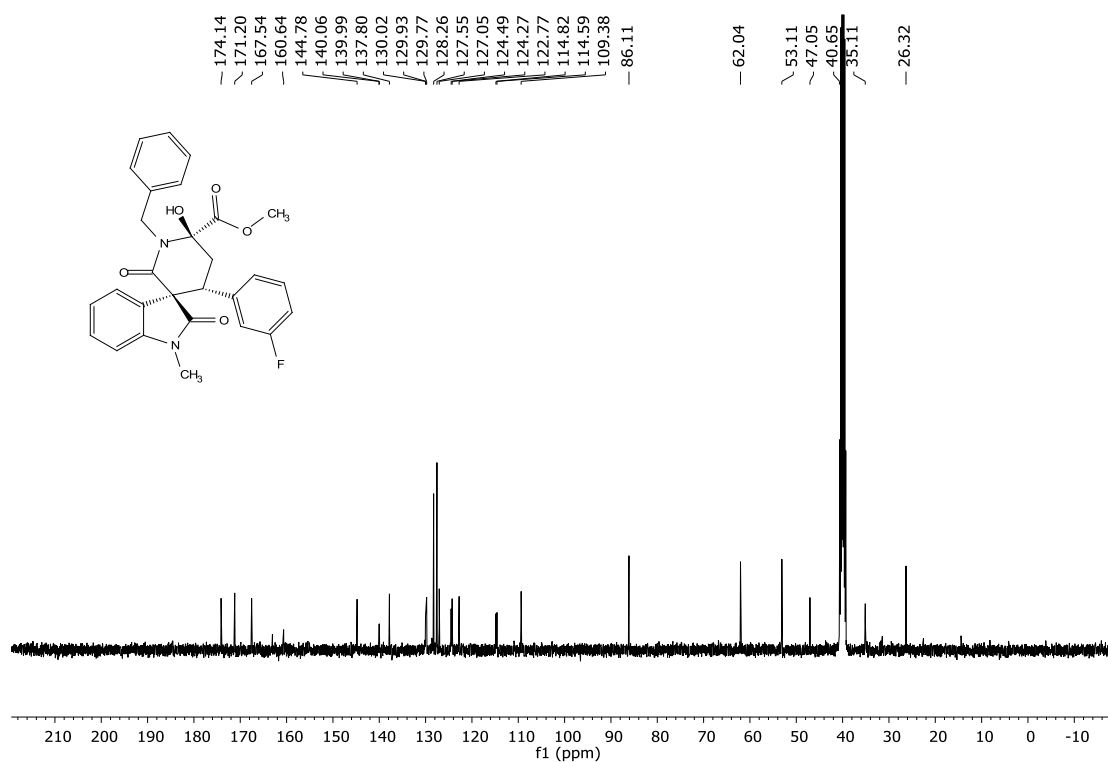

**3cg, <sup>1</sup>H NMR (400 MHz, CDCl<sub>3</sub>):**

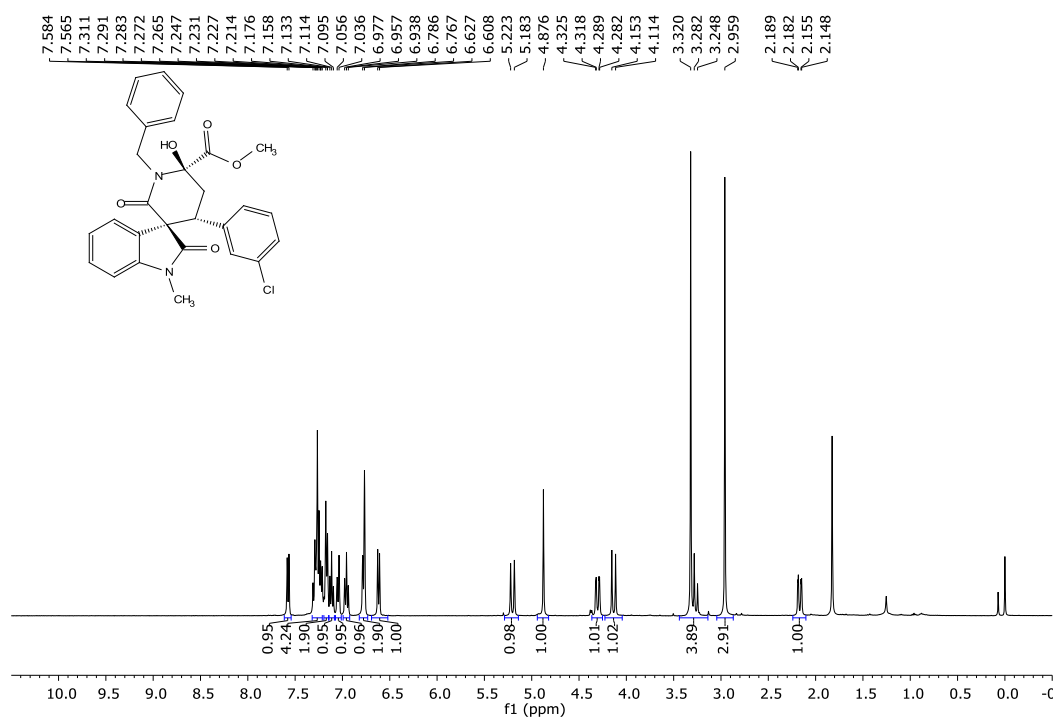

**3cg, <sup>13</sup>C NMR (100 MHz, CDCl<sub>3</sub>):**

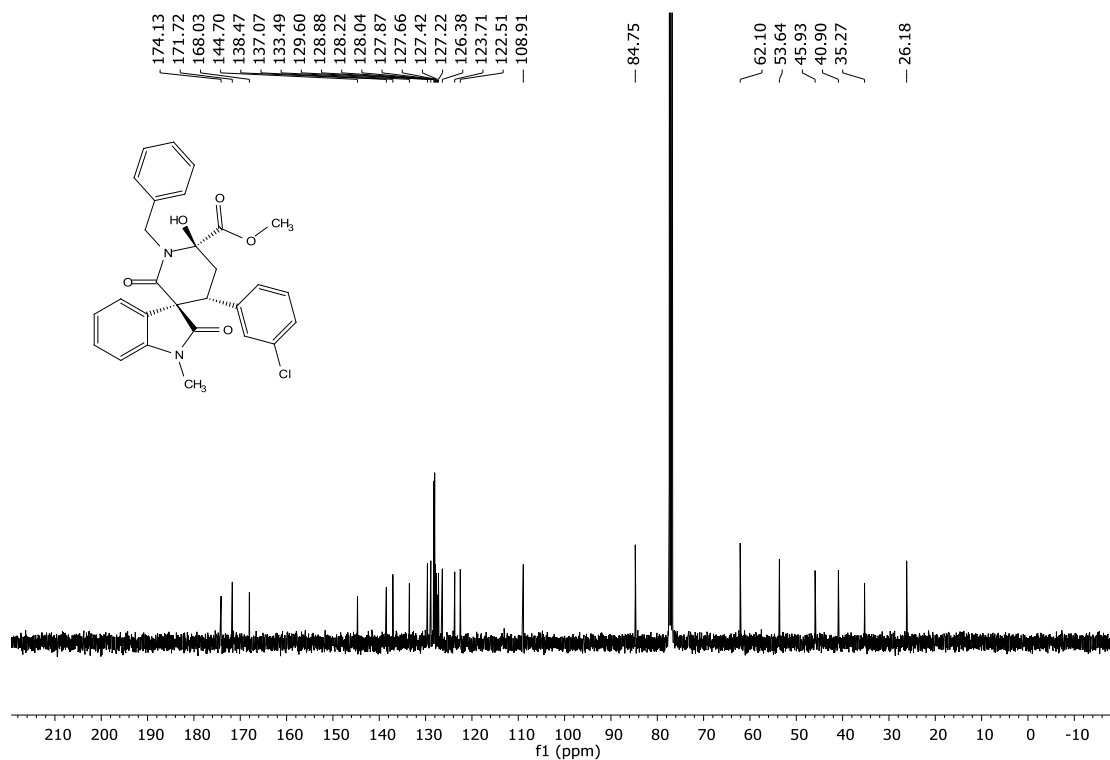



**3ch,  $^1\text{H}$  NMR (400 MHz,  $\text{DMSO-}d_6$ ):**

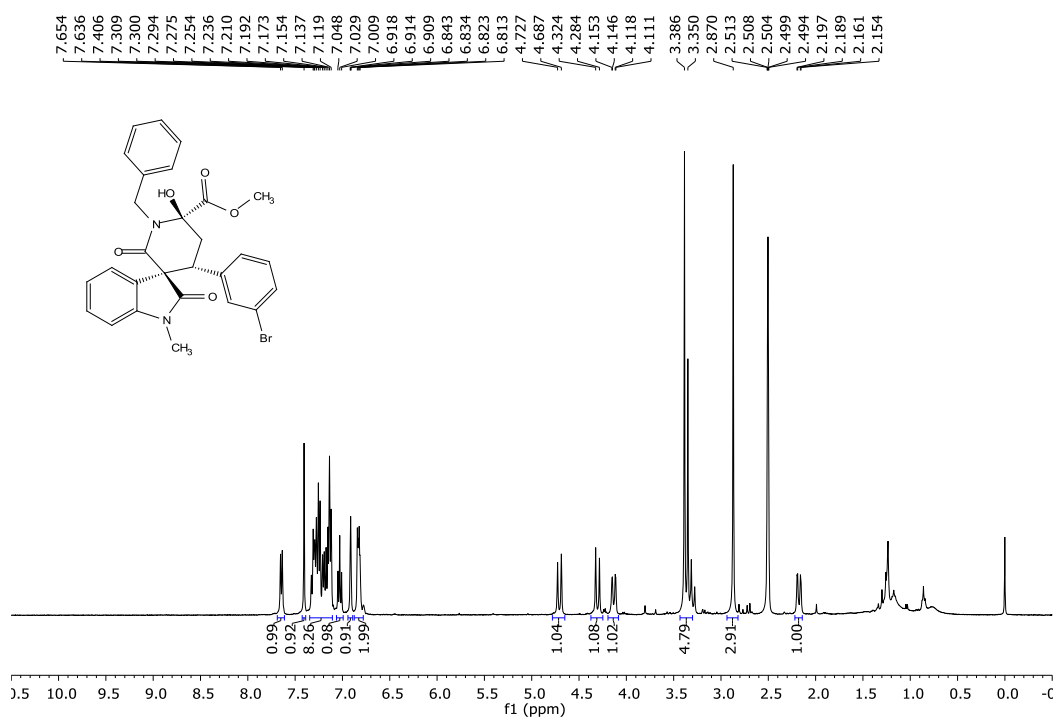

**3ch,  $^{13}\text{C}$  NMR (100 MHz,  $\text{DMSO-}d_6$ ):**

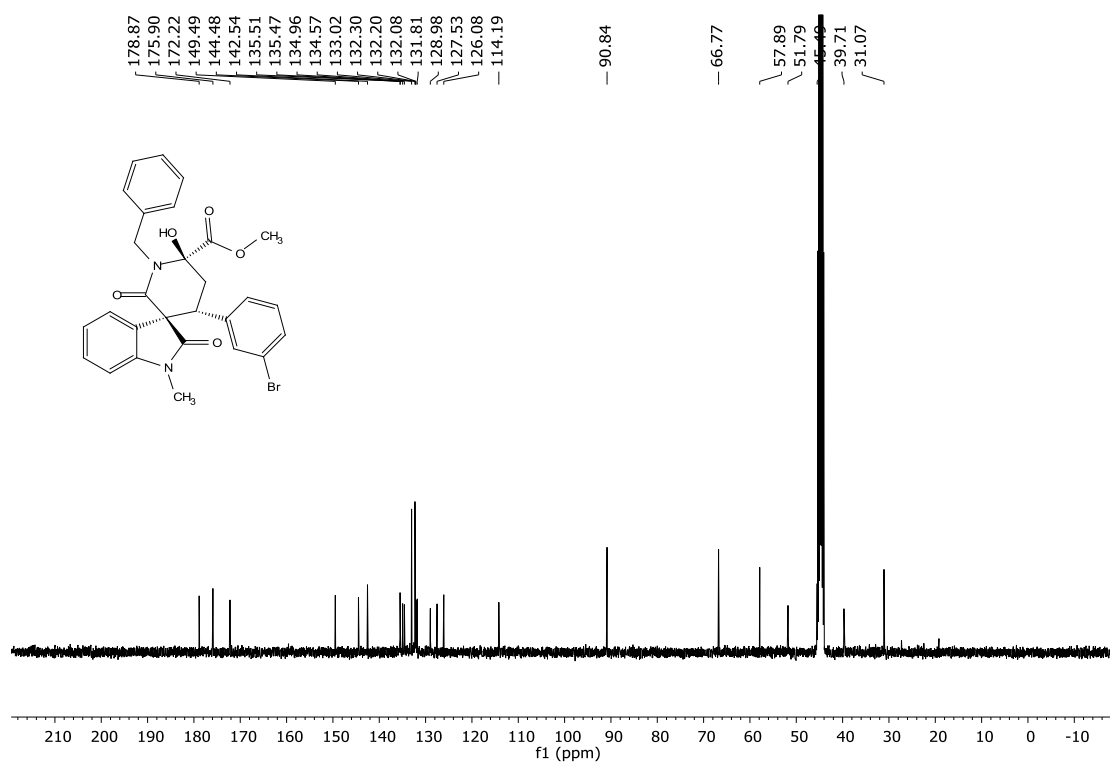

**3ci, <sup>1</sup>H NMR (400 MHz, CDCl<sub>3</sub>):**

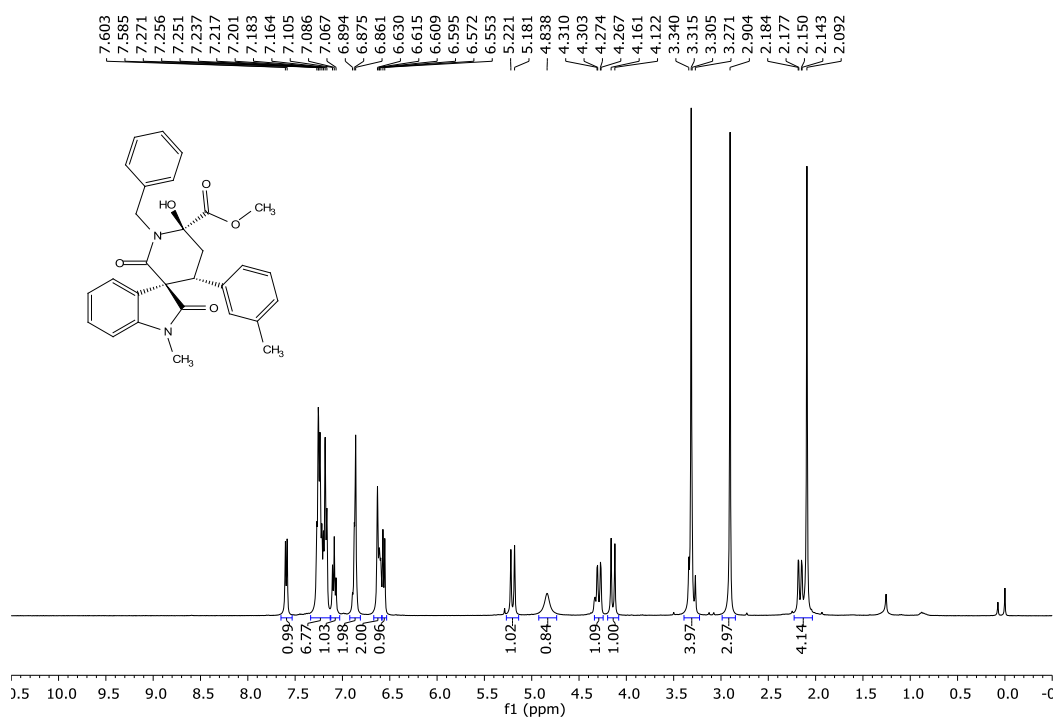

**3ci, <sup>13</sup>C NMR (100 MHz, CDCl<sub>3</sub>):**

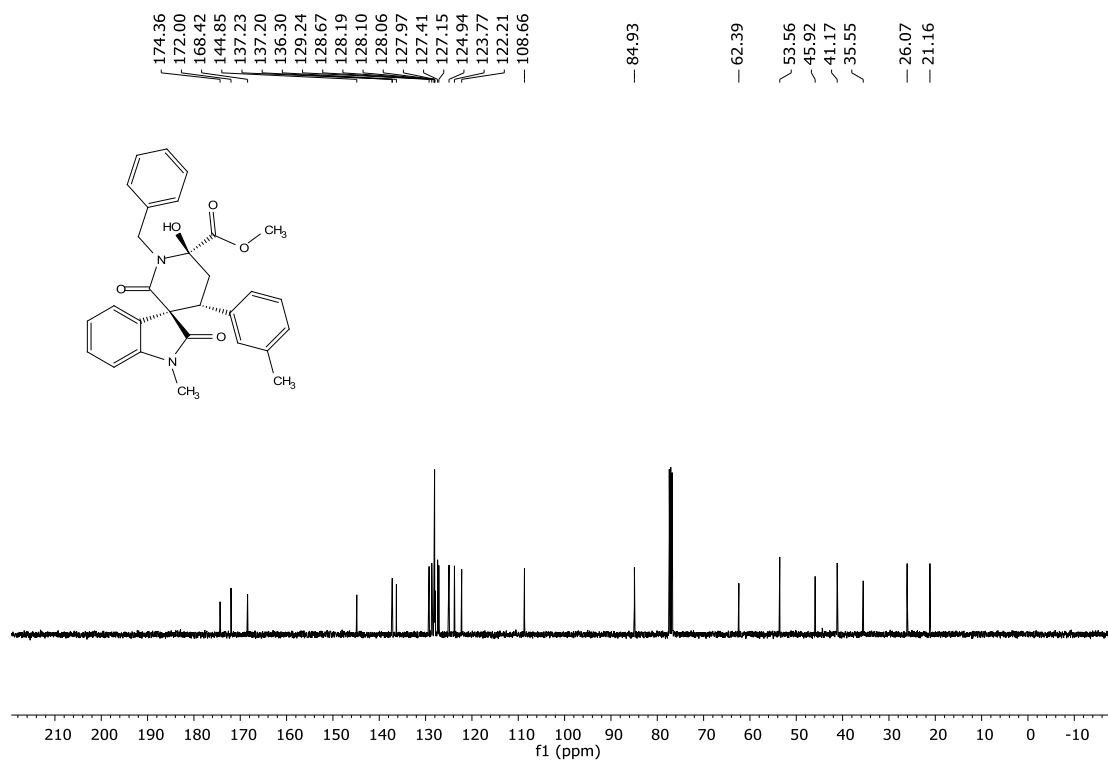

**3cj, <sup>1</sup>H NMR (400 MHz, CDCl<sub>3</sub>):**

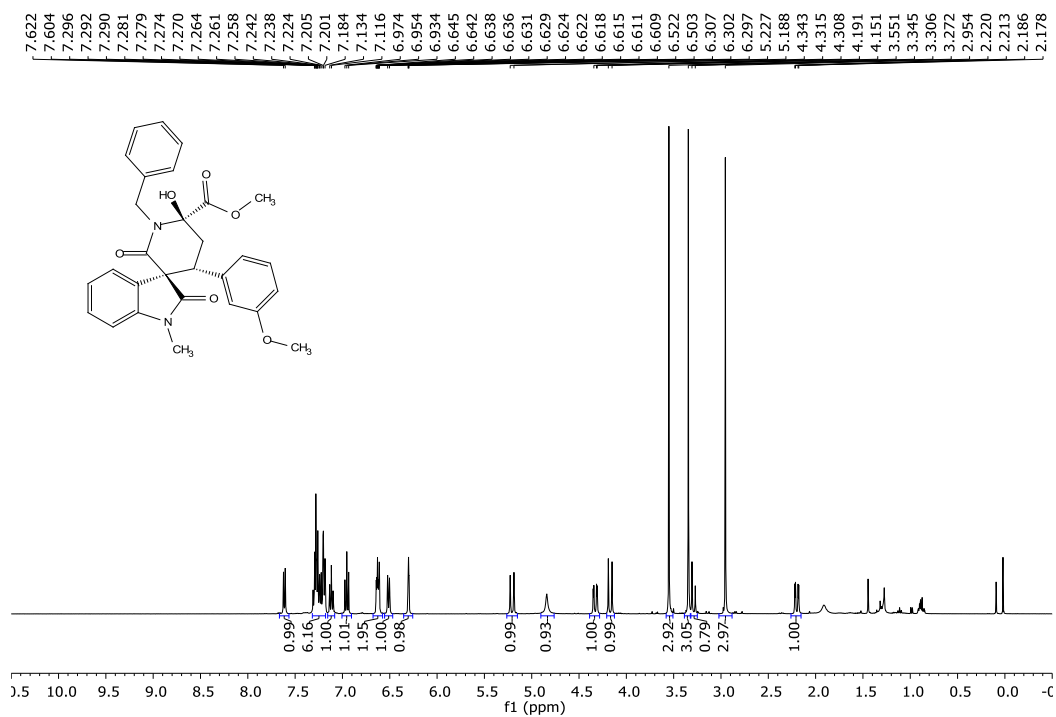

**3cj, <sup>13</sup>C NMR (100 MHz, CDCl<sub>3</sub>):**

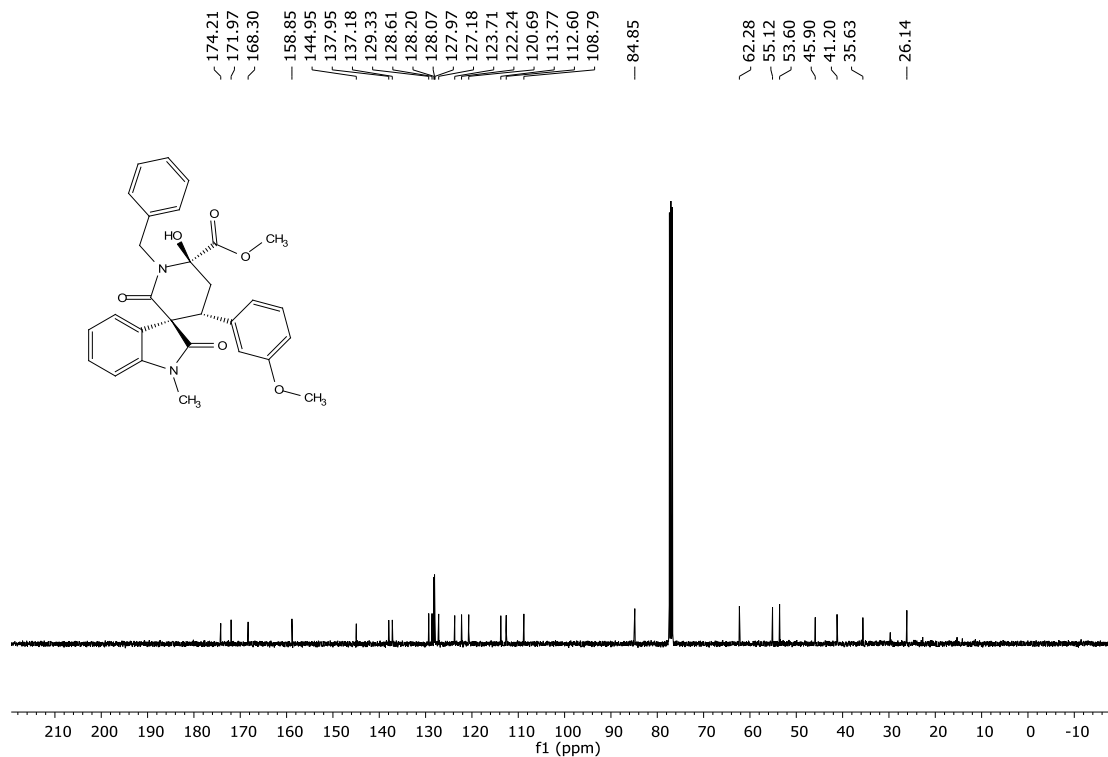

**3ck,  $^1\text{H}$  NMR (400 MHz,  $\text{CDCl}_3$ ):**

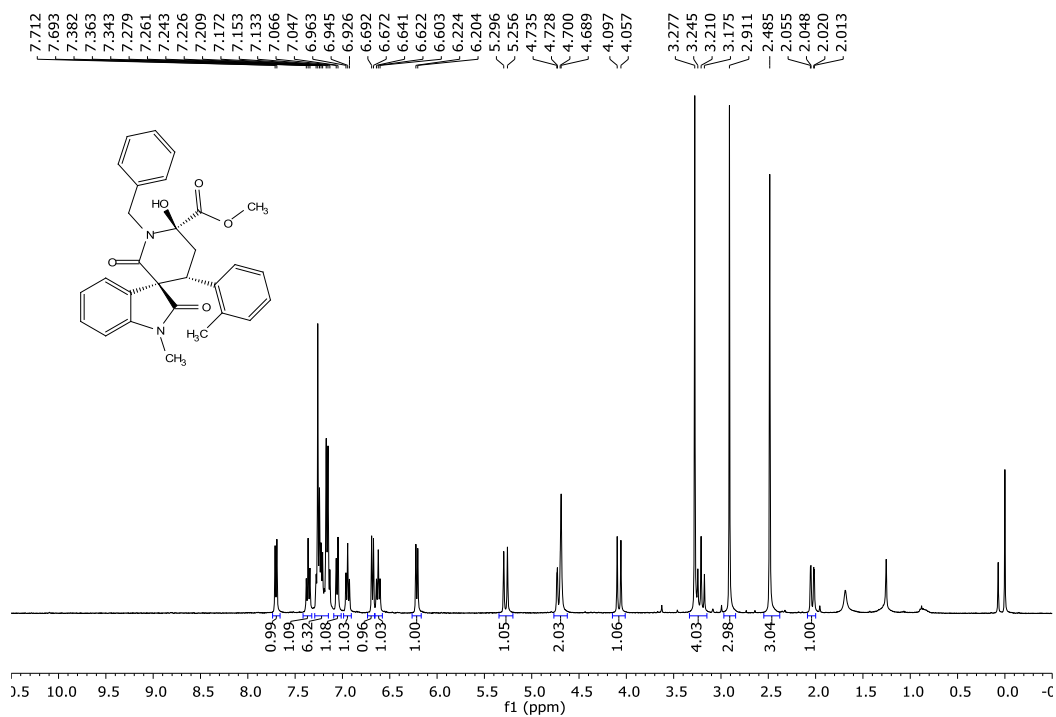

**3ck,  $^{13}\text{C}$  NMR (100 MHz,  $\text{CDCl}_3$ )**

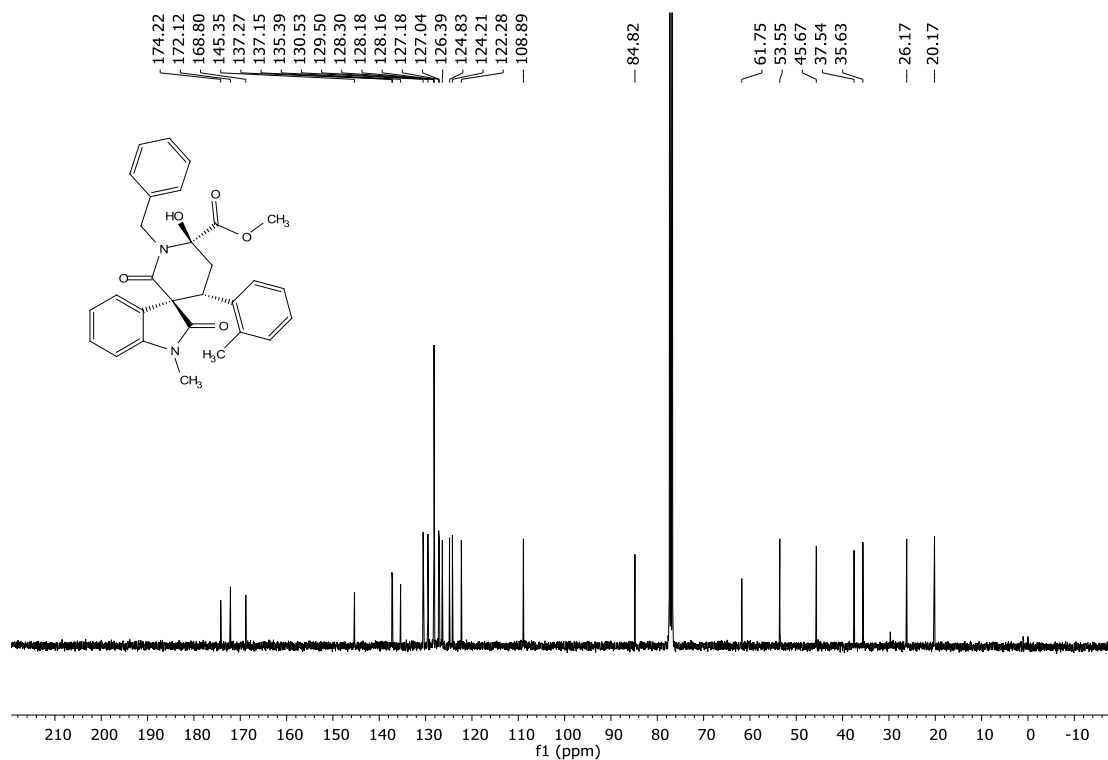

**3cl,  $^1\text{H}$  NMR (400 MHz,  $\text{CDCl}_3$ ):**

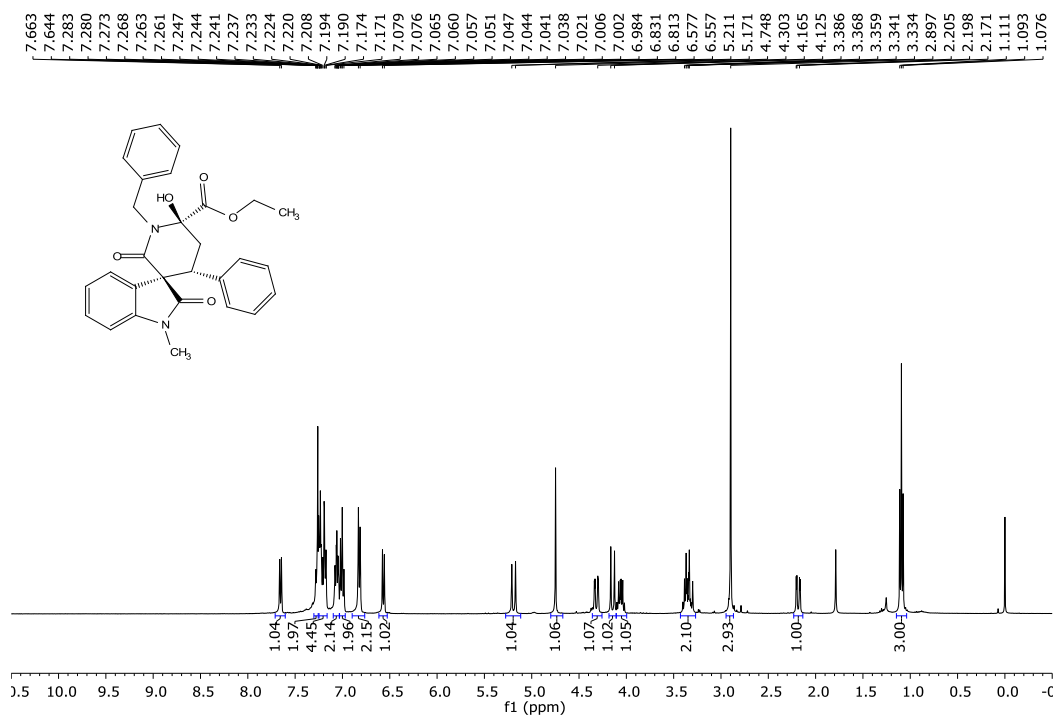

**3cl,  $^{13}\text{C}$  NMR (100 MHz,  $\text{CDCl}_3$ ):**

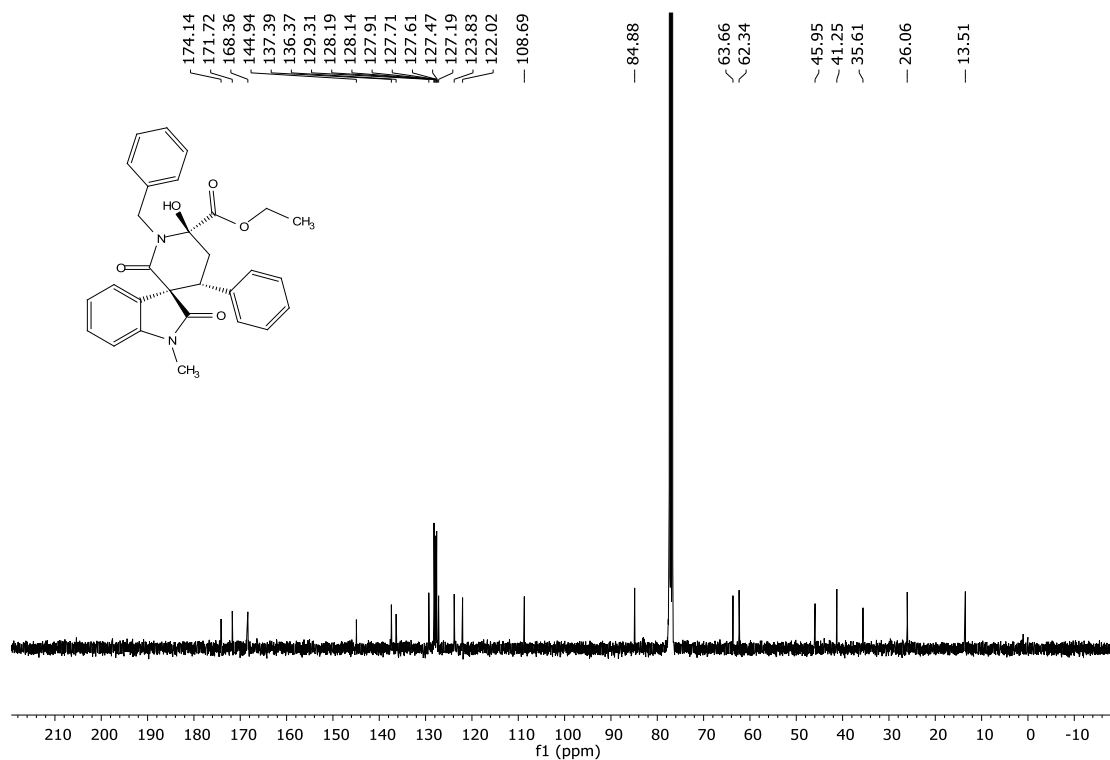

**3cm, <sup>1</sup>H NMR (400 MHz, CDCl<sub>3</sub>):**

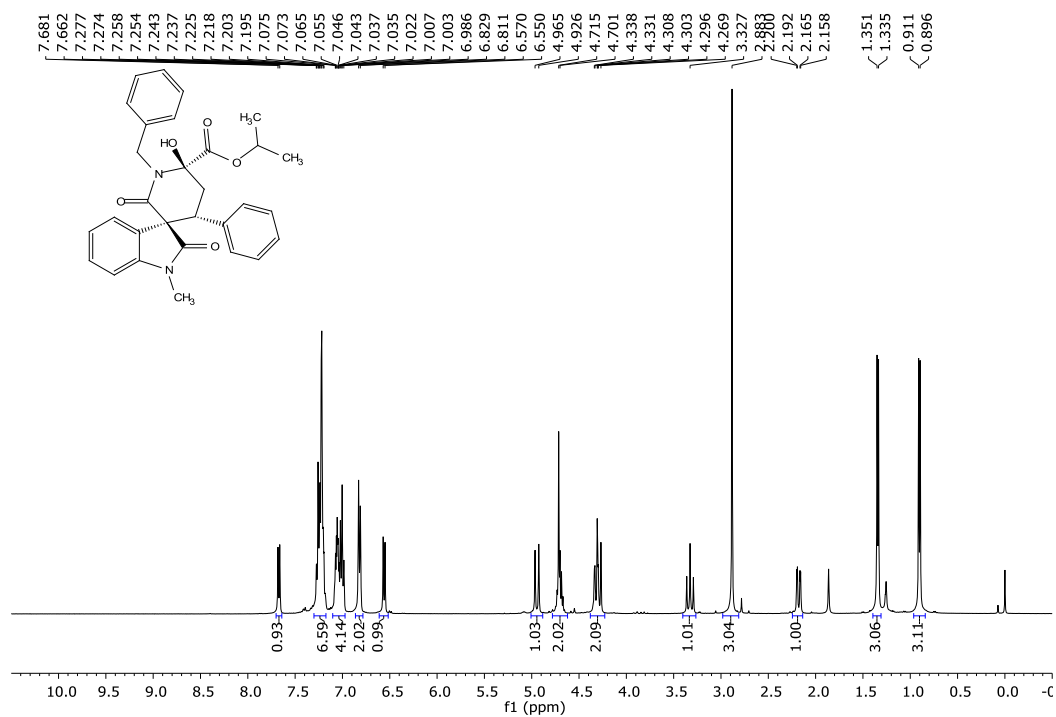

**3cm, <sup>13</sup>C NMR (100 MHz, CDCl<sub>3</sub>):**

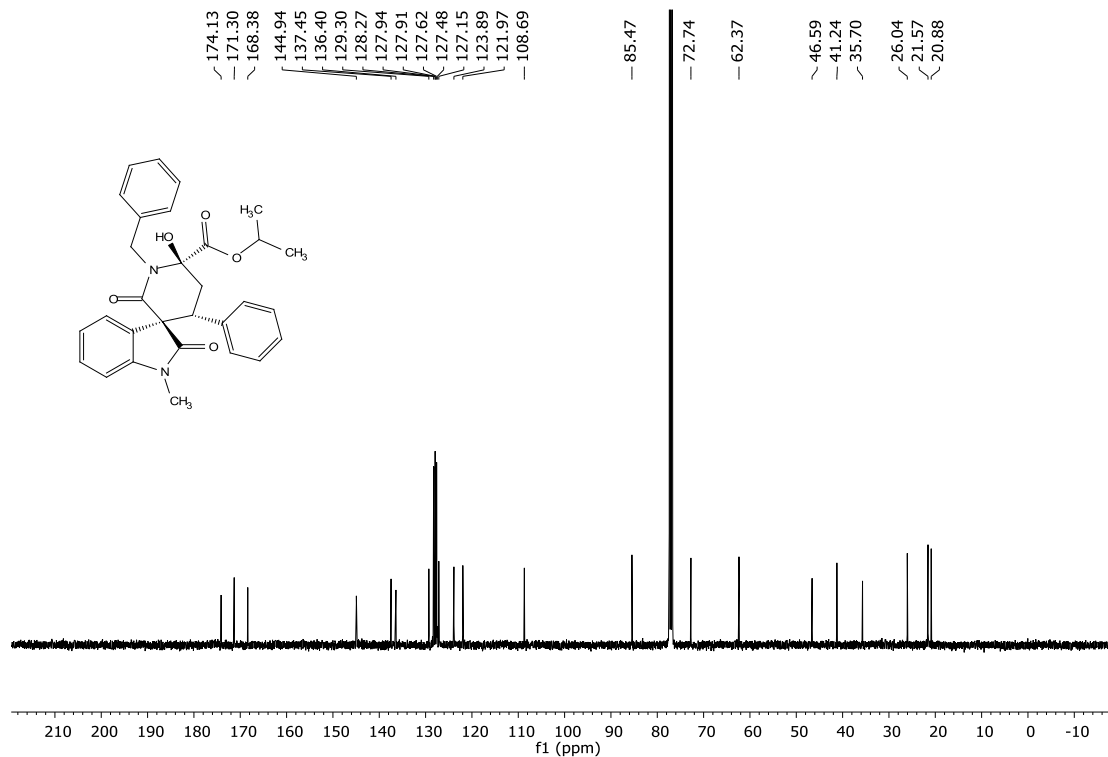

**4, <sup>1</sup>H NMR (400 MHz, CDCl<sub>3</sub>):**

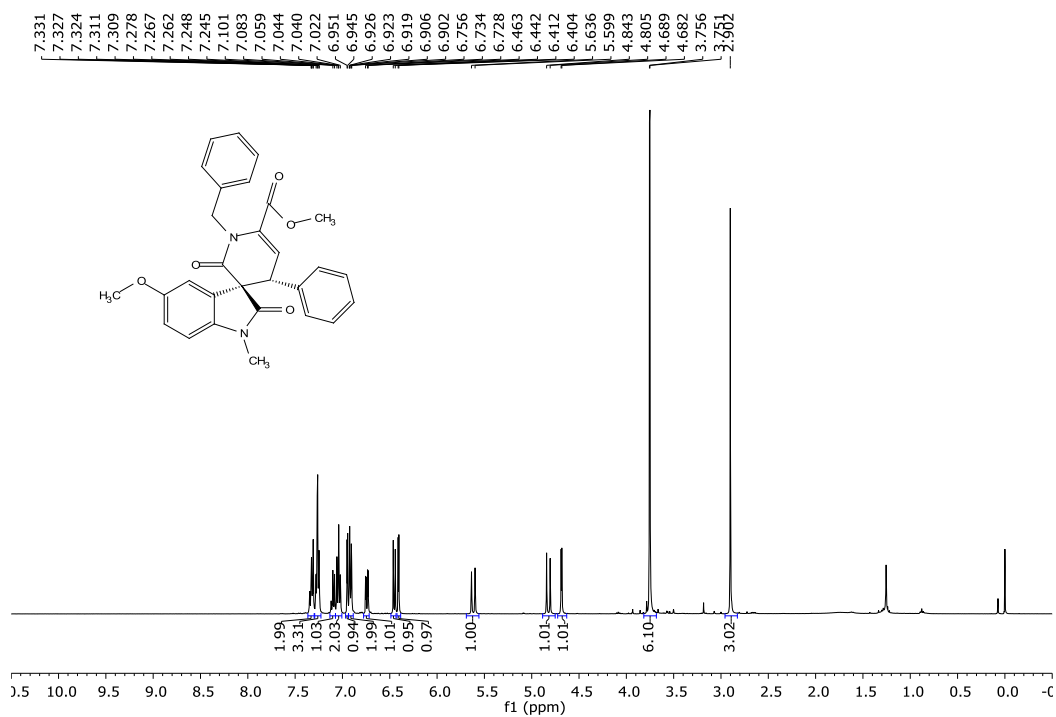

**4, <sup>13</sup>C NMR (100 MHz, CDCl<sub>3</sub>):**

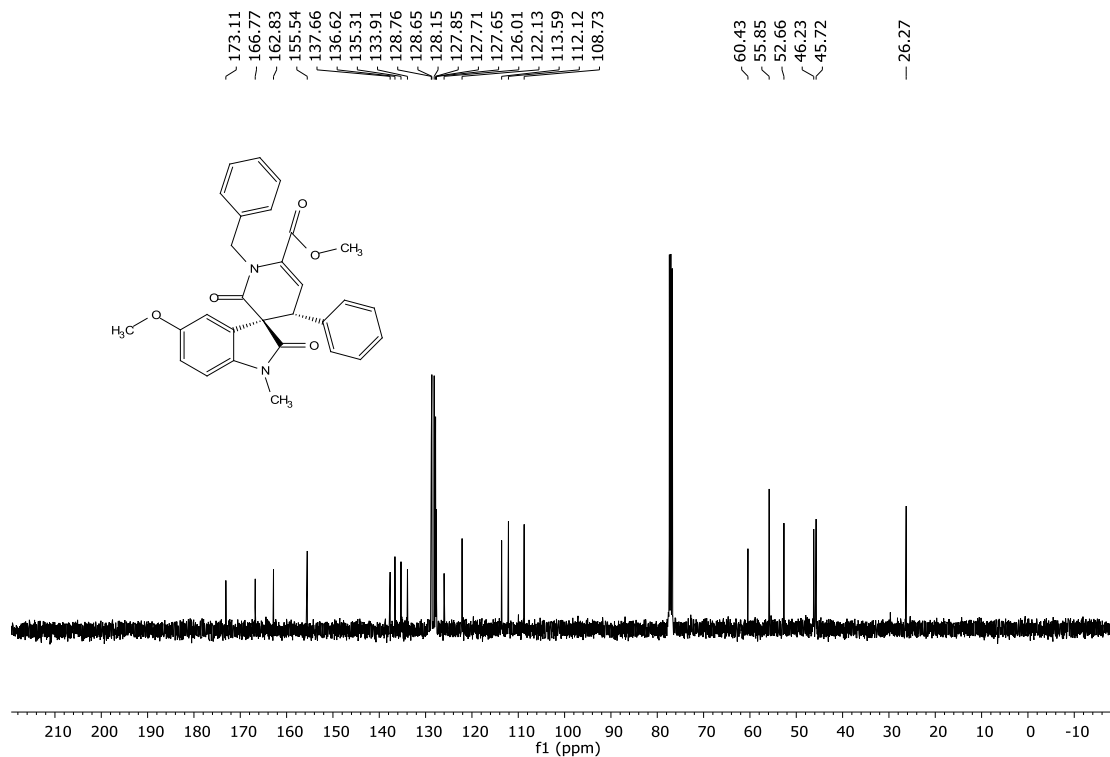

5, <sup>1</sup>H NMR (400 MHz, CDCl<sub>3</sub>):

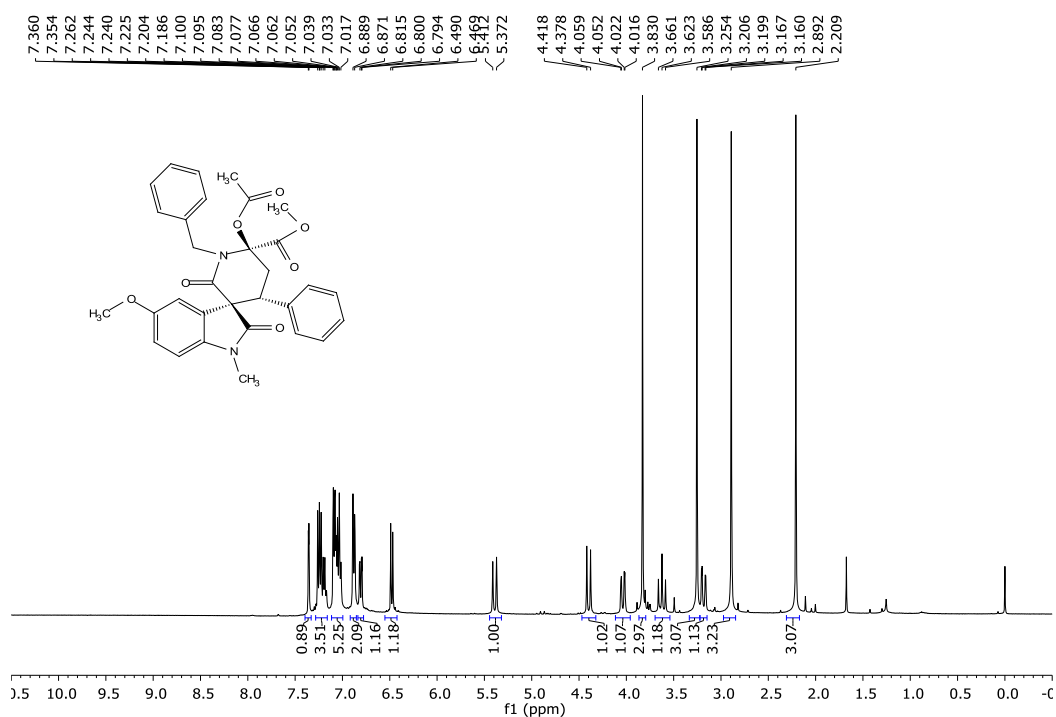

5, <sup>13</sup>C NMR (100 MHz, CDCl<sub>3</sub>):

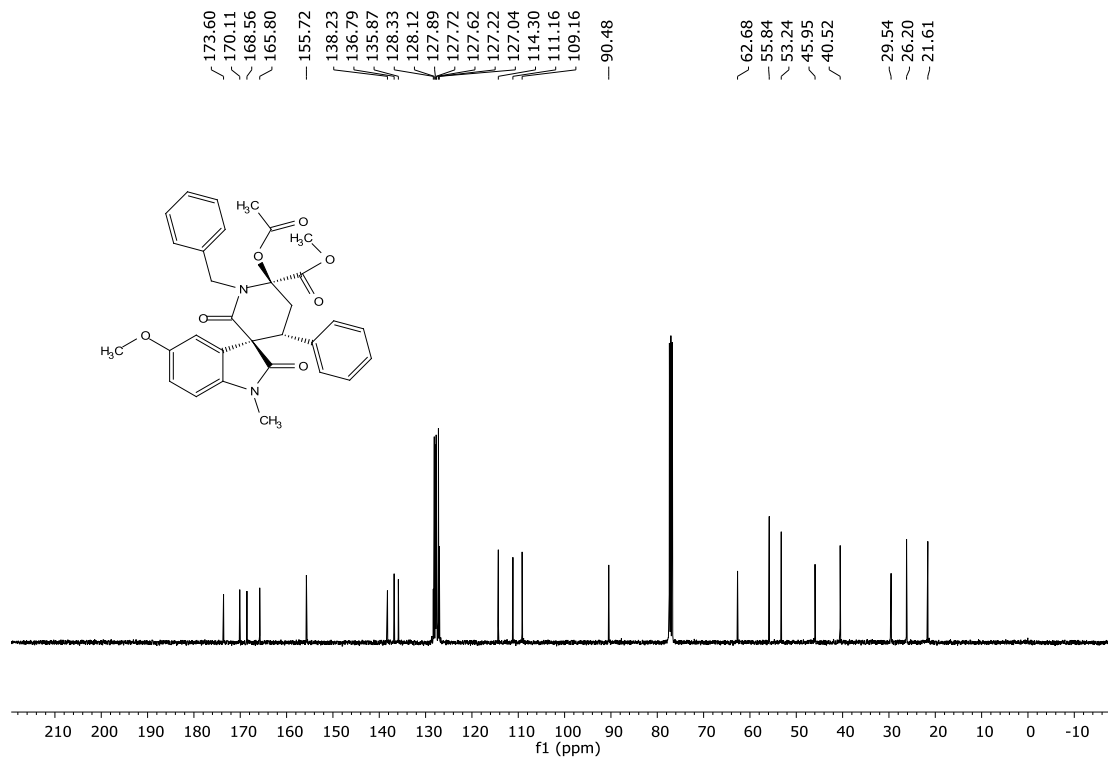



**6, <sup>1</sup>H NMR (400 MHz, CDCl<sub>3</sub>):**

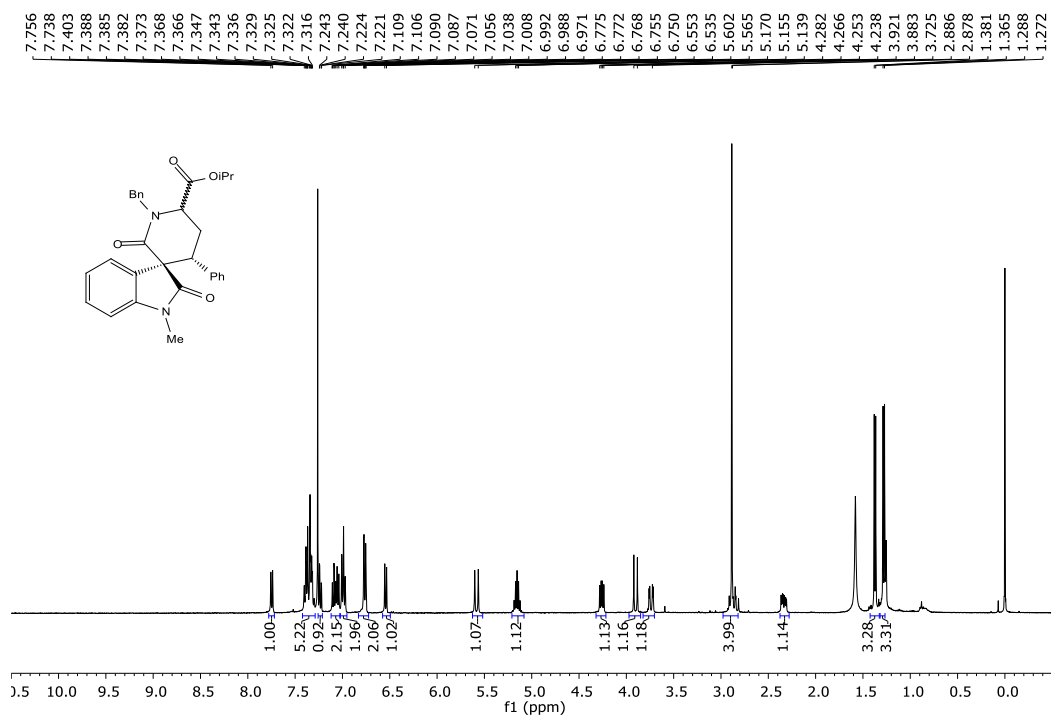

**6, <sup>13</sup>C NMR (100 MHz, CDCl<sub>3</sub>):**

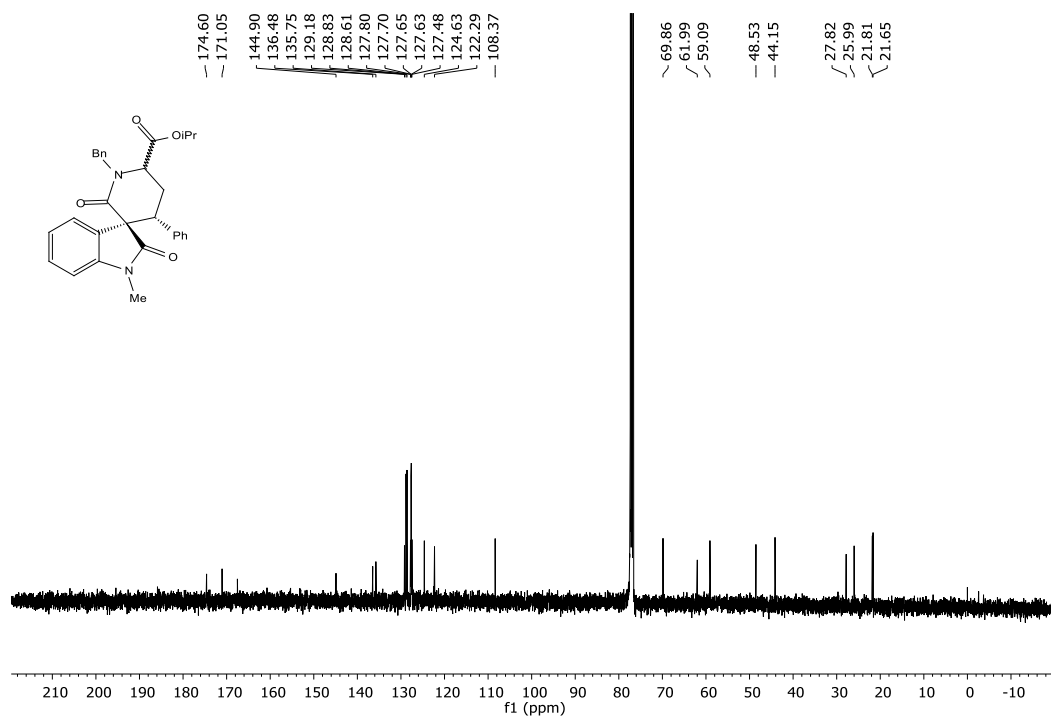

## 10. HPLC spectra

### 3aa:

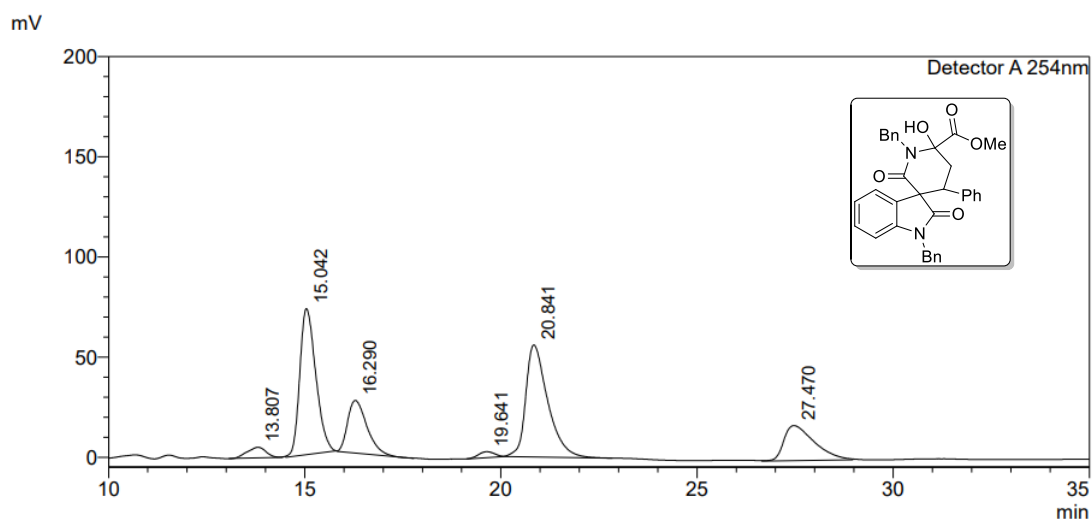

#### <Peak Table>

Detector A 254nm

| Peak# | Ret. Time | Area    | Height | Area%   |
|-------|-----------|---------|--------|---------|
| 1     | 13.807    | 180740  | 5355   | 2.828   |
| 2     | 15.042    | 2074076 | 72903  | 32.454  |
| 3     | 16.290    | 904430  | 26287  | 14.152  |
| 4     | 19.641    | 88573   | 3035   | 1.386   |
| 5     | 20.841    | 2194903 | 55995  | 34.344  |
| 6     | 27.470    | 948162  | 17551  | 14.836  |
| Total |           | 6390885 | 181126 | 100.000 |

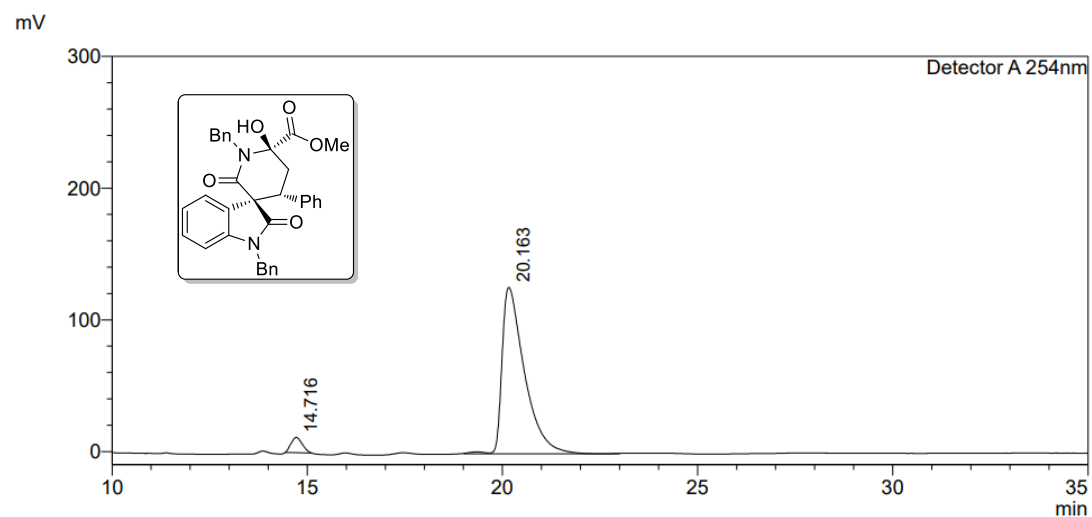

#### <Peak Table>

Detector A 254nm

| Peak# | Ret. Time | Area    | Height | Area%   |
|-------|-----------|---------|--------|---------|
| 1     | 14.716    | 232575  | 11602  | 4.408   |
| 2     | 20.163    | 5043880 | 126362 | 95.592  |
| Total |           | 5276455 | 137963 | 100.000 |

**3ba:**

mV

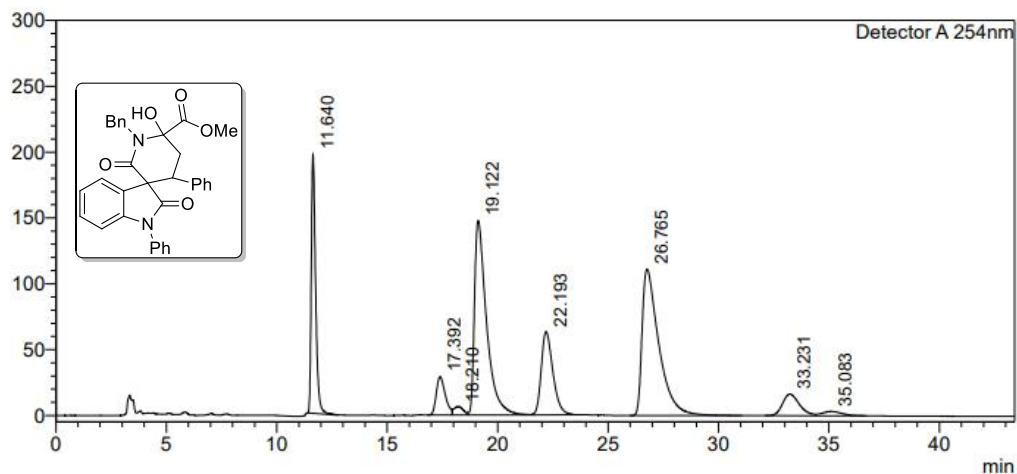

**<Peak Table>**

Detector A 254nm

| Peak# | Ret. Time | Area     | Height | Area%   |
|-------|-----------|----------|--------|---------|
| 1     | 11.640    | 2670766  | 196488 | 14.362  |
| 2     | 17.392    | 827247   | 29048  | 4.449   |
| 3     | 18.210    | 193766   | 6509   | 1.042   |
| 4     | 19.122    | 5621234  | 147674 | 30.228  |
| 5     | 22.193    | 2321491  | 63277  | 12.484  |
| 6     | 26.765    | 5886607  | 111282 | 31.655  |
| 7     | 33.231    | 868690   | 16366  | 4.671   |
| 8     | 35.083    | 206255   | 3302   | 1.109   |
| Total |           | 18596056 | 573946 | 100.000 |

mV

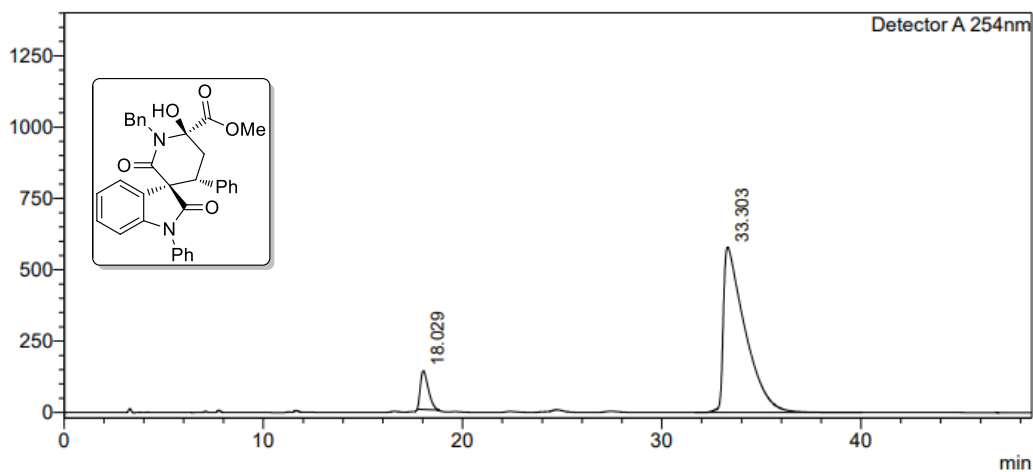

**<Peak Table>**

Detector A 254nm

| Peak# | Ret. Time | Area     | Height | Area%   |
|-------|-----------|----------|--------|---------|
| 1     | 18.029    | 3737119  | 135616 | 7.829   |
| 2     | 33.303    | 43994795 | 579635 | 92.171  |
| Total |           | 47731914 | 715251 | 100.000 |

3ca:

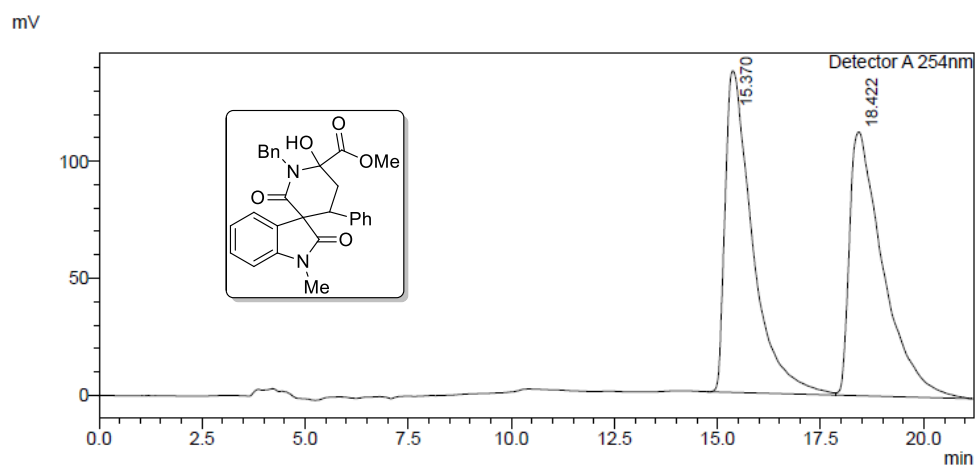

<Peak Table>

Detector A 254nm

| Peak# | Ret. Time | Area     | Height | Area%   |
|-------|-----------|----------|--------|---------|
| 1     | 15.370    | 6343838  | 137358 | 49.842  |
| 2     | 18.422    | 6384155  | 112728 | 50.158  |
| Total |           | 12727994 | 250086 | 100.000 |

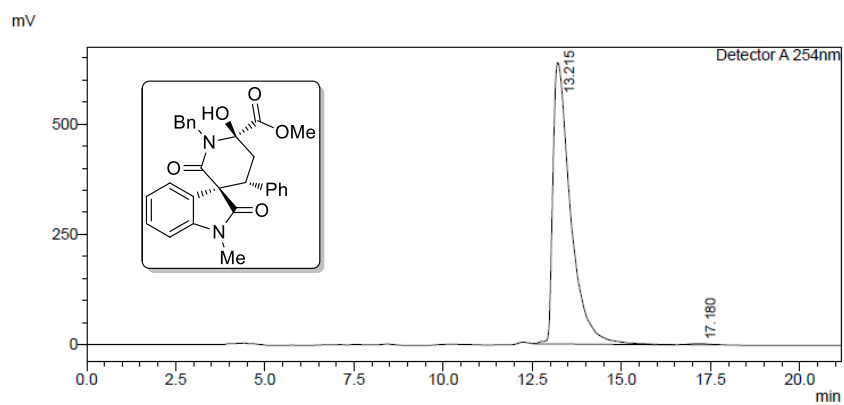

<Peak Table>

Detector A 254nm

| Peak# | Ret. Time | Area     | Height | Area%   |
|-------|-----------|----------|--------|---------|
| 1     | 13.215    | 21991475 | 638147 | 99.658  |
| 2     | 17.180    | 75425    | 2133   | 0.342   |
| Total |           | 22066900 | 640280 | 100.000 |

### 3da:

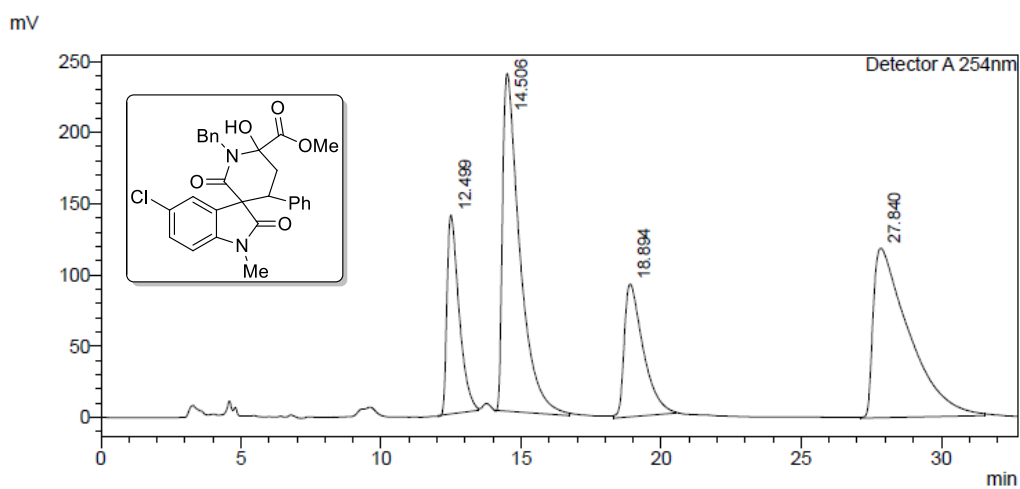

#### <Peak Table>

Detector A 254nm

| Peak# | Ret. Time | Area     | Height | Area%   |
|-------|-----------|----------|--------|---------|
| 1     | 12.499    | 4187706  | 139493 | 14.293  |
| 2     | 14.506    | 10151156 | 236859 | 34.647  |
| 3     | 18.894    | 4395988  | 93242  | 15.004  |
| 4     | 27.840    | 10564339 | 118932 | 36.057  |
| Total |           | 29299190 | 588525 | 100.000 |

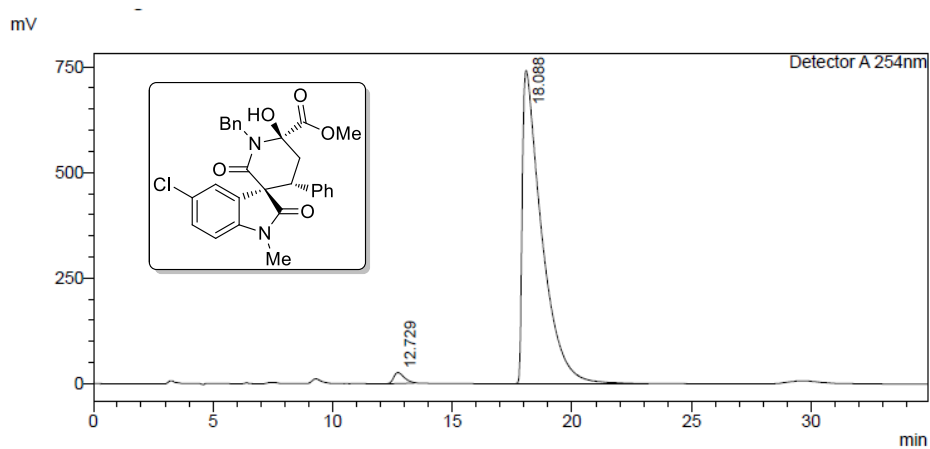

#### <Peak Table>

Detector A 254nm

| Peak# | Ret. Time | Area     | Height | Area%   |
|-------|-----------|----------|--------|---------|
| 1     | 12.729    | 810682   | 26138  | 1.898   |
| 2     | 18.088    | 41909090 | 742036 | 98.102  |
| Total |           | 42719772 | 768174 | 100.000 |

3ea:

mV

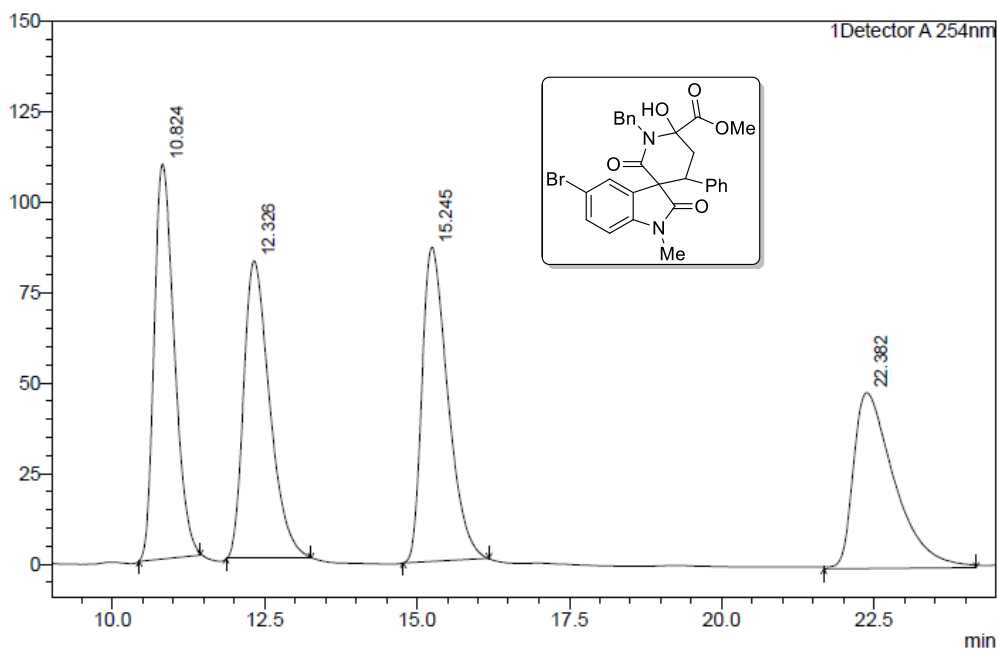

<Peak Table>

Detector A 254nm

| Peak# | Ret. Time | Area    | Height | Area%   |
|-------|-----------|---------|--------|---------|
| 1     | 10.824    | 2504790 | 109031 | 25.698  |
| 2     | 12.326    | 2413784 | 82158  | 24.764  |
| 3     | 15.245    | 2550650 | 86708  | 26.168  |
| 4     | 22.382    | 2277980 | 48563  | 23.371  |
| Total |           | 9747205 | 326460 | 100.000 |

mV

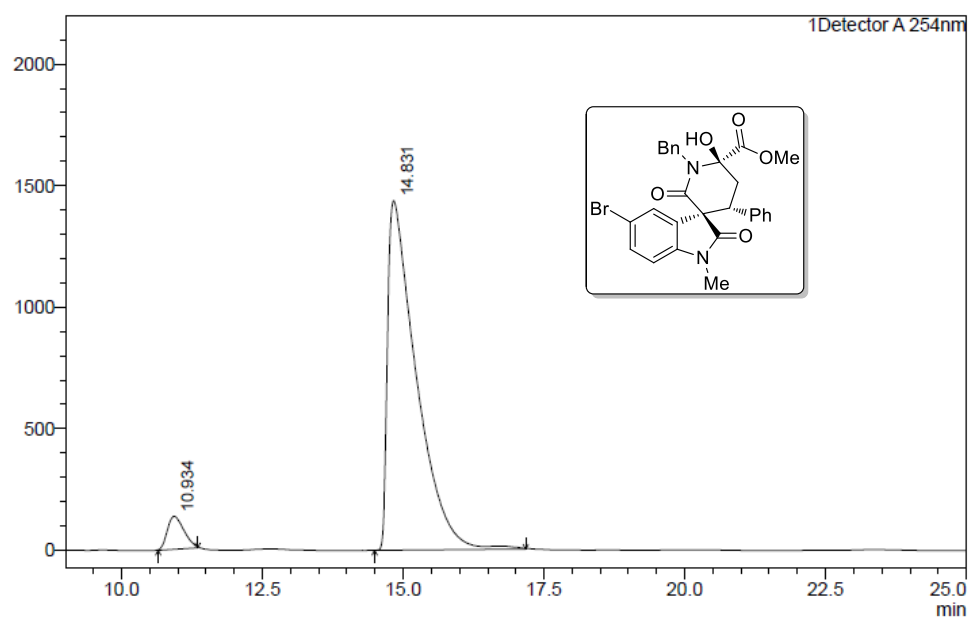

<Peak Table>

Detector A 254nm

| Peak# | Ret. Time | Area     | Height  | Area%   |
|-------|-----------|----------|---------|---------|
| 1     | 10.934    | 2791620  | 136013  | 5.186   |
| 2     | 14.831    | 51040421 | 1438028 | 94.814  |
| Total |           | 53832041 | 1574041 | 100.000 |

**3fa:**

mV

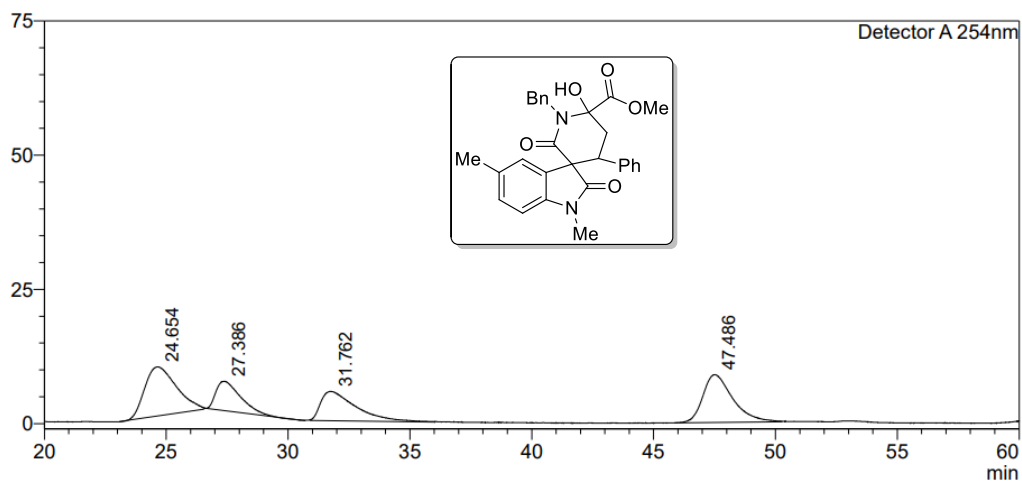**<Peak Table>**

Detector A 254nm

| Peak# | Ret. Time | Area    | Height | Area%   |
|-------|-----------|---------|--------|---------|
| 1     | 24.654    | 825442  | 9145   | 32.648  |
| 2     | 27.386    | 383551  | 5446   | 15.170  |
| 3     | 31.762    | 558329  | 5476   | 22.083  |
| 4     | 47.486    | 761011  | 8910   | 30.099  |
| Total |           | 2528333 | 28977  | 100.000 |

mV

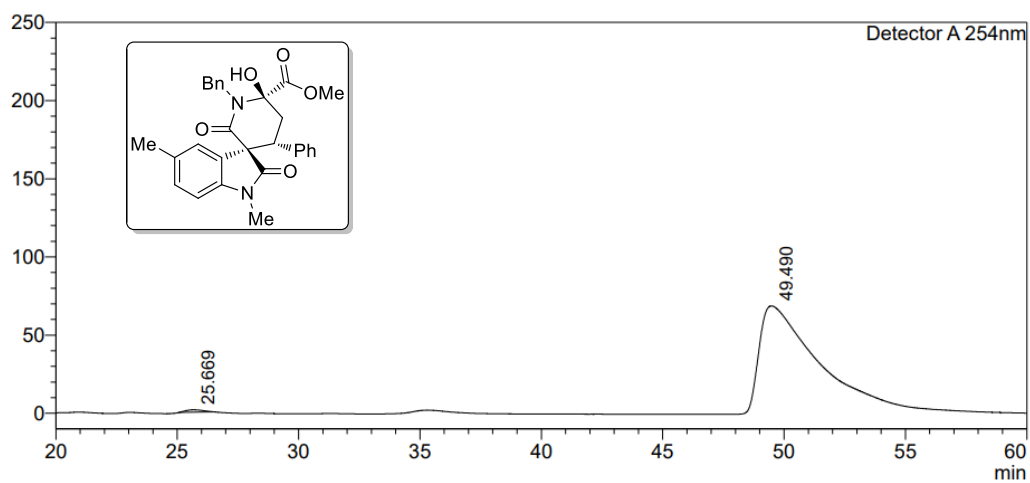**<Peak Table>**

Detector A 254nm

| Peak# | Ret. Time | Area     | Height | Area%   |
|-------|-----------|----------|--------|---------|
| 1     | 25.669    | 77223    | 1536   | 0.614   |
| 2     | 49.490    | 12489729 | 69476  | 99.386  |
| Total |           | 12566953 | 71012  | 100.000 |

### 3ga:

mV

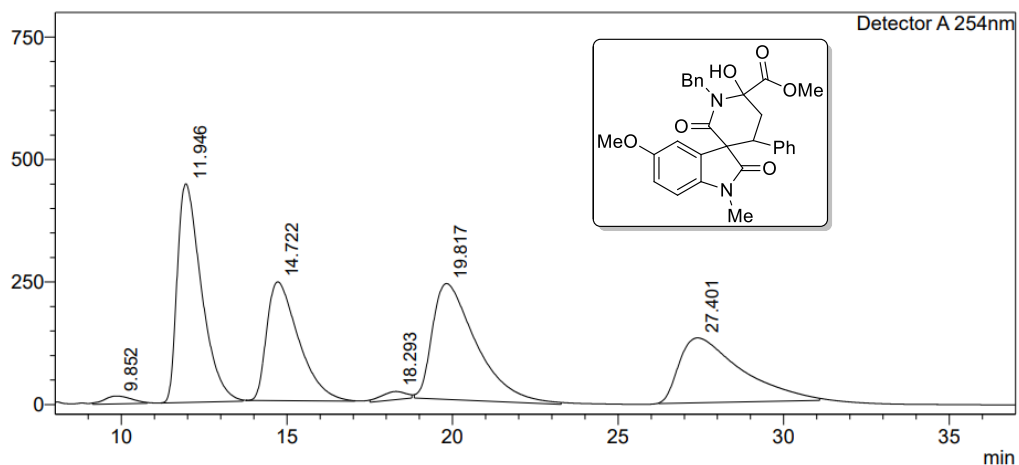

#### <Peak Table>

Detector A 254nm

| Peak# | Ret. Time | Area     | Height  | Area%   |
|-------|-----------|----------|---------|---------|
| 1     | 9.852     | 930961   | 16156   | 1.165   |
| 2     | 11.946    | 22727160 | 446349  | 28.441  |
| 3     | 14.722    | 16295081 | 242199  | 20.392  |
| 4     | 18.293    | 867200   | 16462   | 1.085   |
| 5     | 19.817    | 21824229 | 236308  | 27.311  |
| 6     | 27.401    | 17265307 | 132411  | 21.606  |
| Total |           | 79909938 | 1089885 | 100.000 |

mV

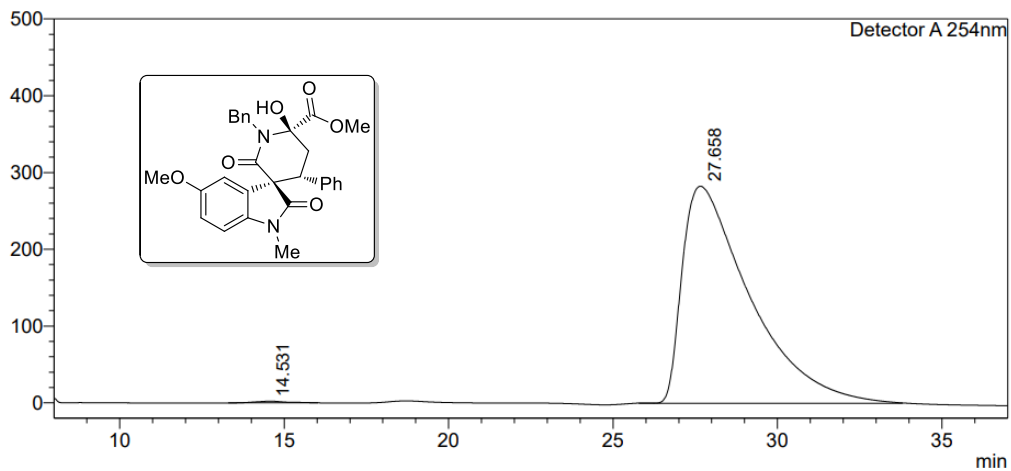

#### <Peak Table>

Detector A 254nm

| Peak# | Ret. Time | Area     | Height | Area%   |
|-------|-----------|----------|--------|---------|
| 1     | 14.531    | 117930   | 2066   | 0.291   |
| 2     | 27.658    | 40414366 | 282578 | 99.709  |
| Total |           | 40532297 | 284644 | 100.000 |



### 3ha:

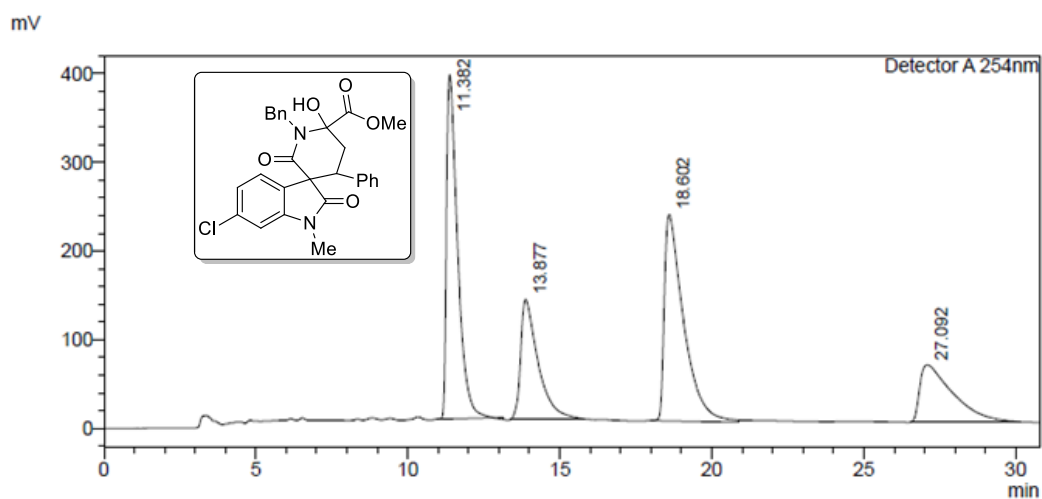

#### <Peak Table>

Detector A 254nm

| Peak# | Ret. Time | Area     | Height | Area%   |
|-------|-----------|----------|--------|---------|
| 1     | 11.382    | 9799804  | 387368 | 32.210  |
| 2     | 13.877    | 5390020  | 135073 | 17.716  |
| 3     | 18.602    | 10275881 | 233070 | 33.774  |
| 4     | 27.092    | 4959402  | 64913  | 16.300  |
| Total |           | 30425107 | 820425 | 100.000 |

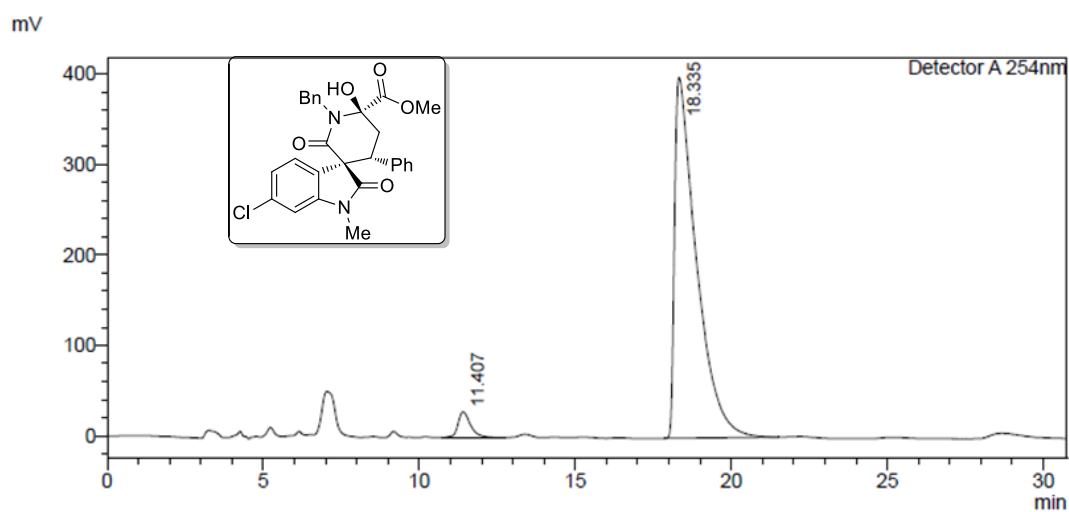

#### <Peak Table>

Detector A 254nm

| Peak# | Ret. Time | Area     | Height | Area%   |
|-------|-----------|----------|--------|---------|
| 1     | 11.407    | 777371   | 28052  | 3.849   |
| 2     | 18.335    | 19419110 | 398356 | 96.151  |
| Total |           | 20196481 | 426408 | 100.000 |

**3ia:**

mV

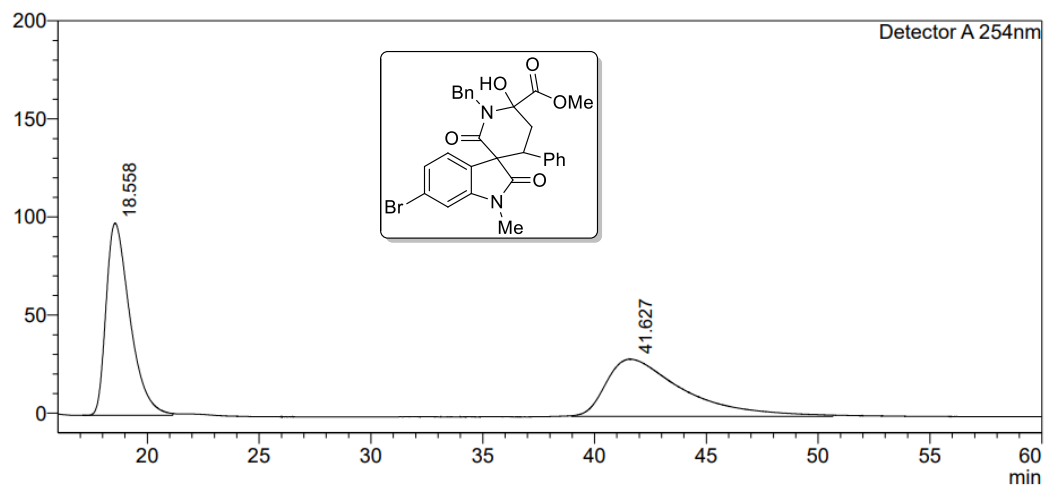**<Peak Table>**

Detector A 254nm

| Peak# | Ret. Time | Area     | Height | Area%   |
|-------|-----------|----------|--------|---------|
| 1     | 18.558    | 7270581  | 97918  | 50.988  |
| 2     | 41.627    | 6988761  | 29179  | 49.012  |
| Total |           | 14259343 | 127098 | 100.000 |

mV

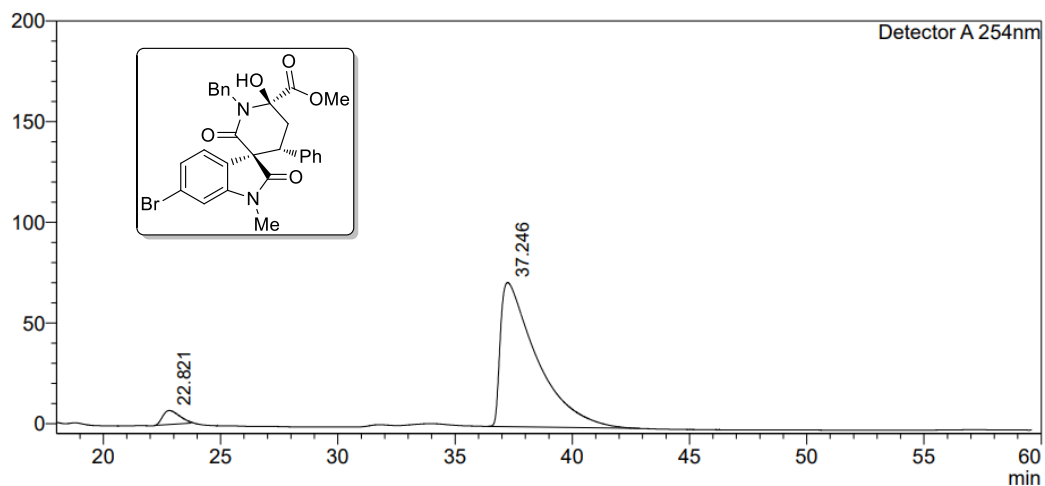**<Peak Table>**

Detector A 254nm

| Peak# | Ret. Time | Area    | Height | Area%   |
|-------|-----------|---------|--------|---------|
| 1     | 22.821    | 343047  | 6956   | 4.242   |
| 2     | 37.246    | 7743630 | 71610  | 95.758  |
| Total |           | 8086677 | 78566  | 100.000 |

### 3ja:

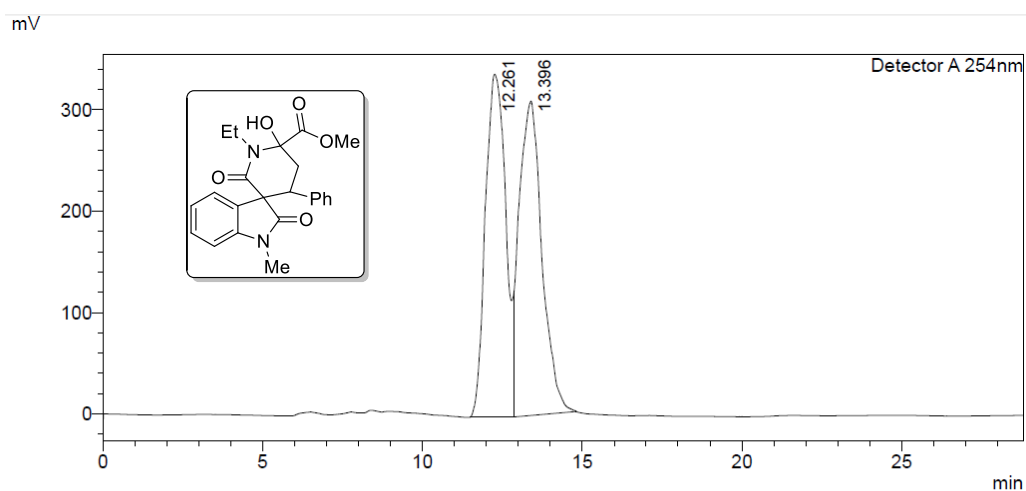

#### <Peak Table>

Detector A 254nm

| Peak# | Ret. Time | Area     | Height | Area%   |
|-------|-----------|----------|--------|---------|
| 1     | 12.261    | 14981131 | 338223 | 49.414  |
| 2     | 13.396    | 15336357 | 310325 | 50.586  |
| Total |           | 30317488 | 648548 | 100.000 |

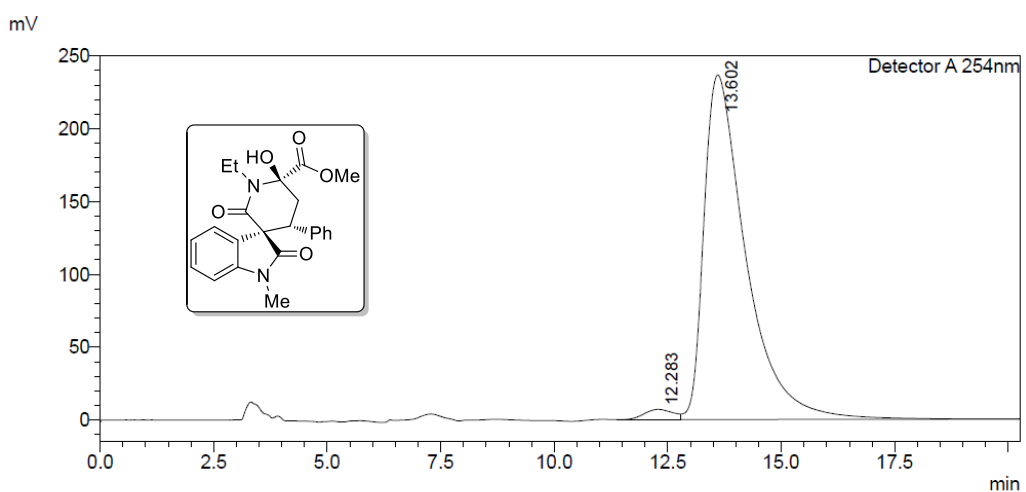

#### <Peak Table>

Detector A 254nm

| Peak# | Ret. Time | Area     | Height | Area%   |
|-------|-----------|----------|--------|---------|
| 1     | 12.283    | 308209   | 6996   | 1.985   |
| 2     | 13.602    | 15220942 | 236625 | 98.015  |
| Total |           | 15529151 | 243621 | 100.000 |

**3cb:**

mV

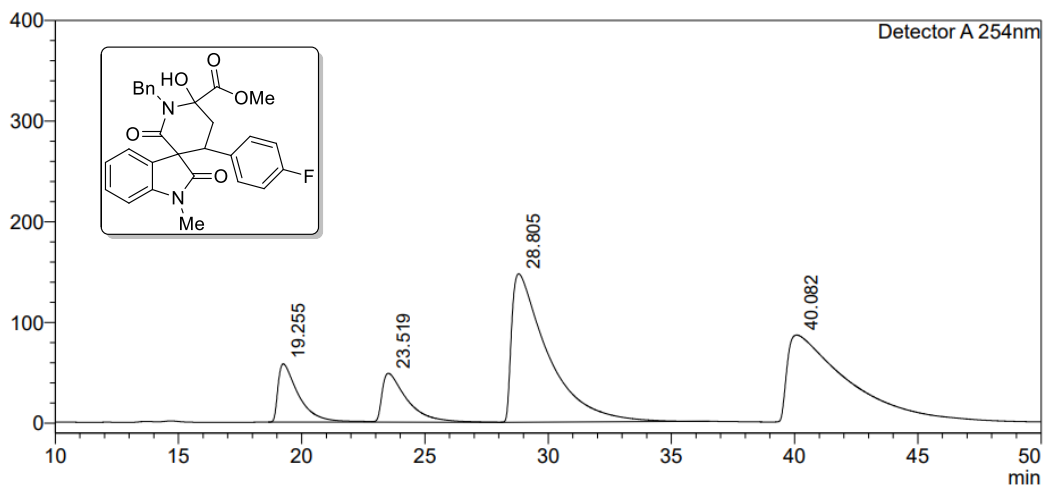**<Peak Table>**

Detector A 254nm

| Peak# | Ret. Time | Area     | Height | Area%   |
|-------|-----------|----------|--------|---------|
| 1     | 19.255    | 3380148  | 57953  | 9.160   |
| 2     | 23.519    | 3409593  | 48638  | 9.239   |
| 3     | 28.805    | 15112751 | 147470 | 40.953  |
| 4     | 40.082    | 15000621 | 86408  | 40.649  |
| Total |           | 36903113 | 340469 | 100.000 |

mV

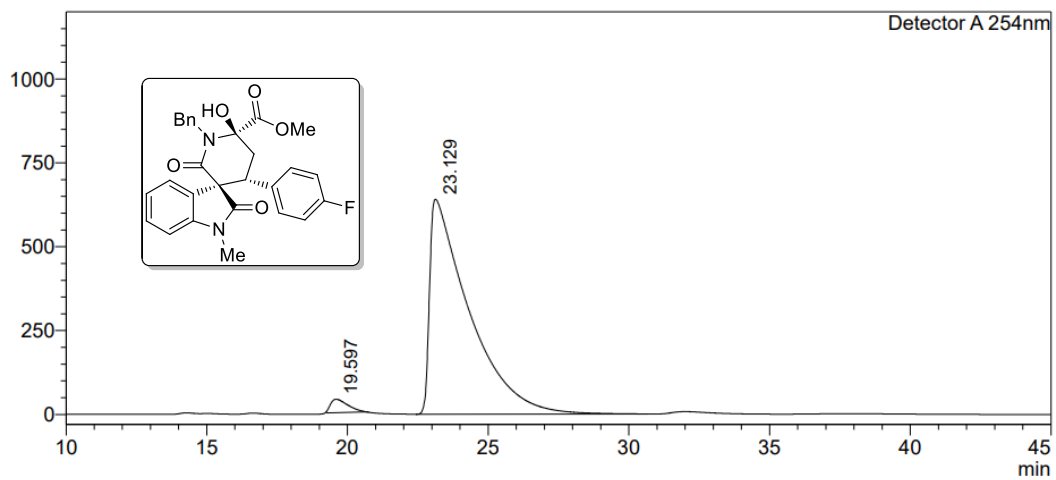**<Peak Table>**

Detector A 254nm

| Peak# | Ret. Time | Area     | Height | Area%   |
|-------|-----------|----------|--------|---------|
| 1     | 19.597    | 1675989  | 39878  | 2.600   |
| 2     | 23.129    | 62792622 | 641258 | 97.400  |
| Total |           | 64468611 | 681135 | 100.000 |

3cc:

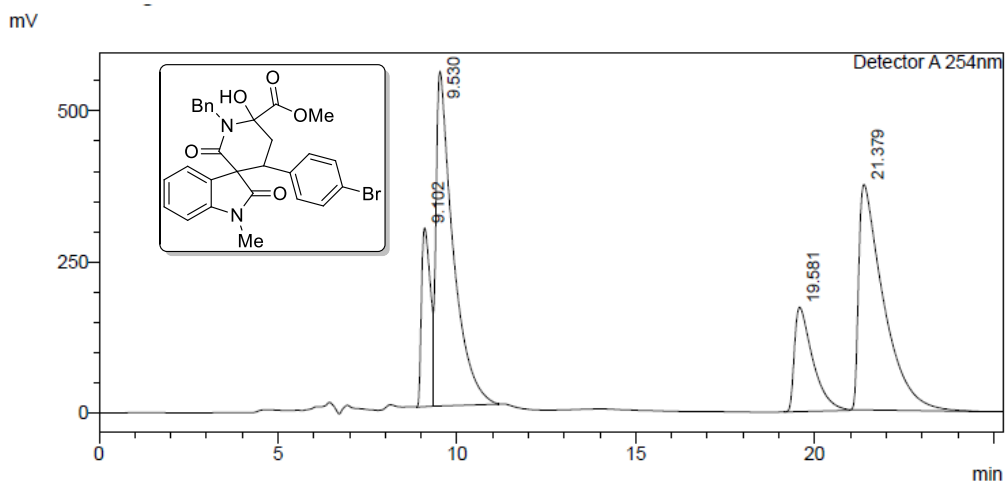

<Peak Table>

Detector A 254nm

| Peak# | Ret. Time | Area     | Height  | Area%   |
|-------|-----------|----------|---------|---------|
| 1     | 9.102     | 5141299  | 296143  | 10.788  |
| 2     | 9.530     | 18334411 | 554076  | 38.469  |
| 3     | 19.581    | 6153513  | 172497  | 12.911  |
| 4     | 21.379    | 18030545 | 373098  | 37.832  |
| Total |           | 47659769 | 1395815 | 100.000 |

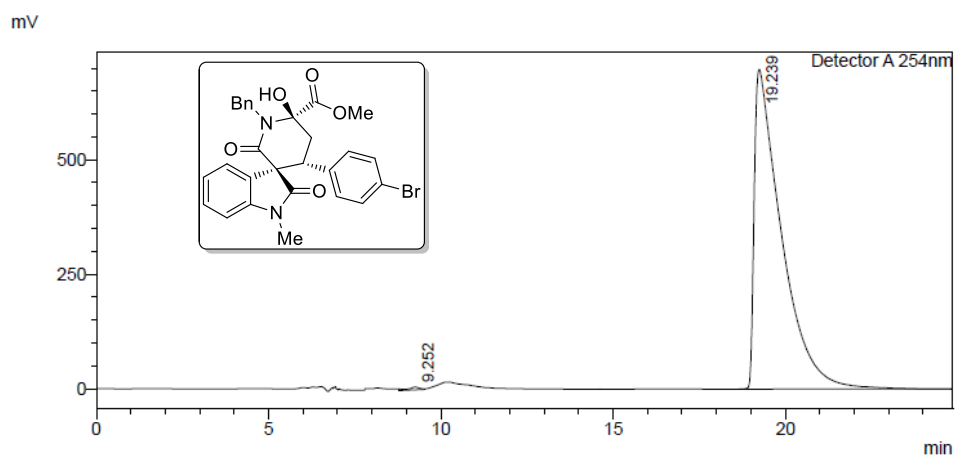

<Peak Table>

Detector A 254nm

| Peak# | Ret. Time | Area     | Height% | Area%   |
|-------|-----------|----------|---------|---------|
| 1     | 9.252     | 148135   | 0.874   | 0.386   |
| 2     | 19.239    | 38268499 | 99.126  | 99.614  |
| Total |           | 38416634 | 100.000 | 100.000 |

**3cd:**

mV

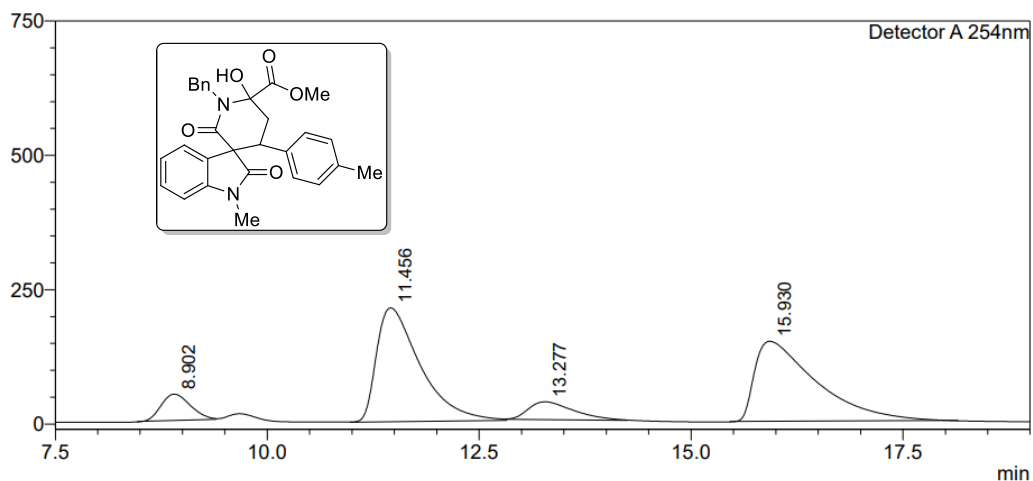**<Peak Table>**

Detector A 254nm

| Peak# | Ret. Time | Area     | Height | Area%   |
|-------|-----------|----------|--------|---------|
| 1     | 8.902     | 1175611  | 48909  | 6.688   |
| 2     | 11.456    | 7640532  | 212223 | 43.464  |
| 3     | 13.277    | 1251899  | 33318  | 7.122   |
| 4     | 15.930    | 7510969  | 148785 | 42.727  |
| Total |           | 17579011 | 443235 | 100.000 |

mV

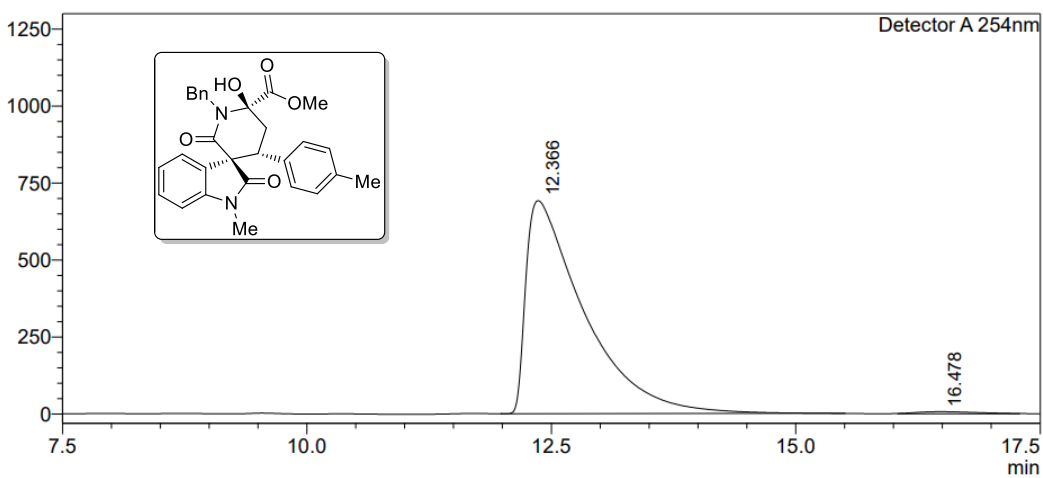**<Peak Table>**

Detector A 254nm

| Peak# | Ret. Time | Area     | Height | Area%   |
|-------|-----------|----------|--------|---------|
| 1     | 12.366    | 28641600 | 691798 | 99.017  |
| 2     | 16.478    | 284436   | 6555   | 0.983   |
| Total |           | 28926036 | 698353 | 100.000 |

3ce:

mV

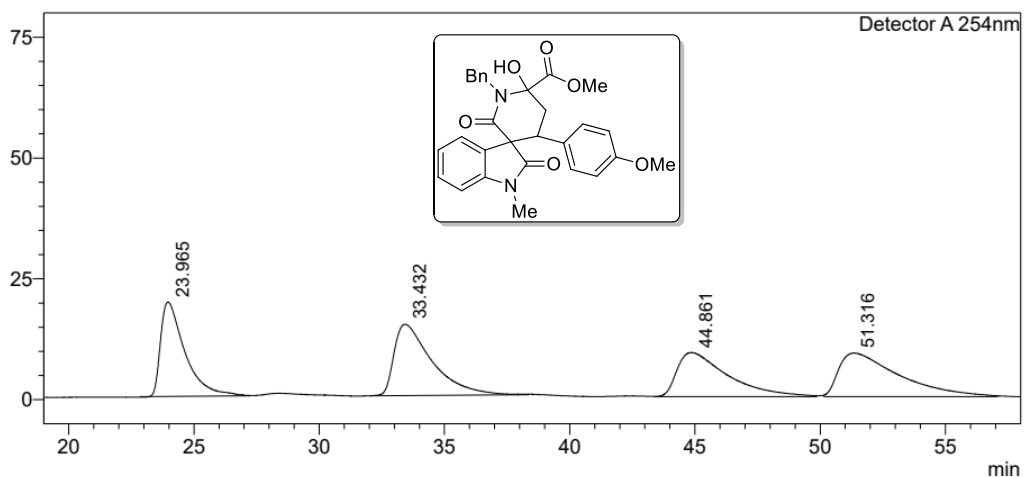

<Peak Table>

Detector A 254nm

| Peak# | Ret. Time | Area    | Height | Area%   |
|-------|-----------|---------|--------|---------|
| 1     | 23.965    | 1319387 | 19535  | 23.200  |
| 2     | 33.432    | 1562184 | 14760  | 27.470  |
| 3     | 44.861    | 1289532 | 9144   | 22.675  |
| 4     | 51.316    | 1515852 | 9038   | 26.655  |
| Total |           | 5686954 | 52478  | 100.000 |

mV

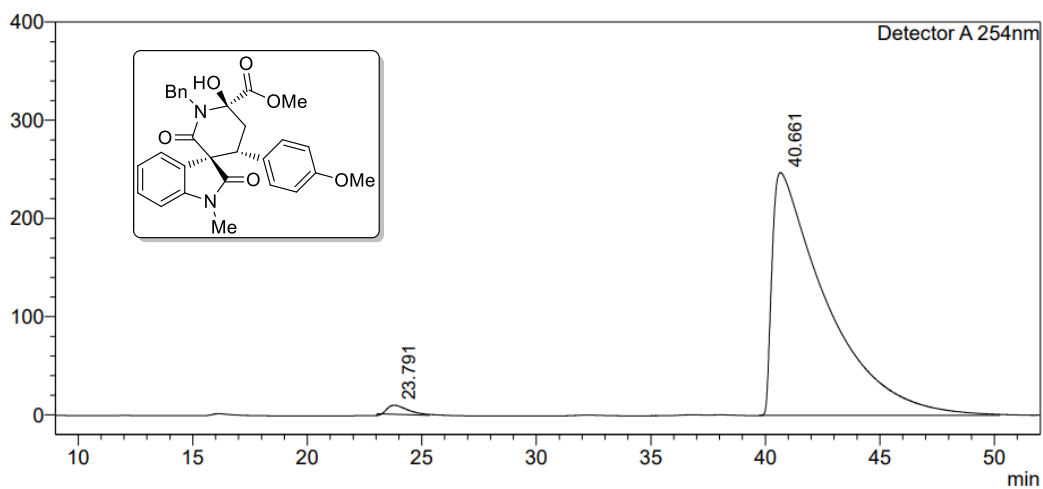

<Peak Table>

Detector A 254nm

| Peak# | Ret. Time | Area     | Height | Area%   |
|-------|-----------|----------|--------|---------|
| 1     | 23.791    | 553294   | 9080   | 1.342   |
| 2     | 40.661    | 40664865 | 247186 | 98.658  |
| Total |           | 41218159 | 256266 | 100.000 |

3cf:

mV

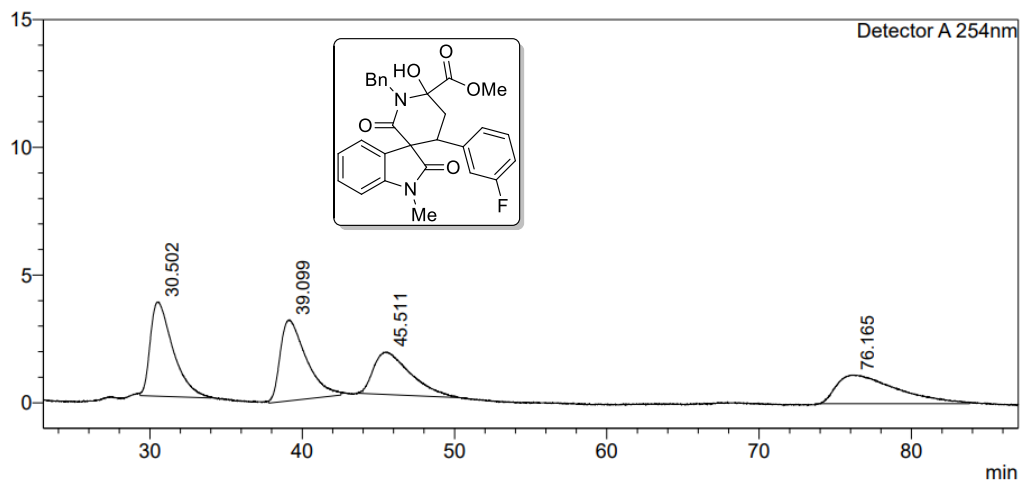

<Peak Table>

Detector A 254nm

| Peak# | Ret. Time | Area    | Height | Area%   |
|-------|-----------|---------|--------|---------|
| 1     | 30.502    | 383528  | 3684   | 28.557  |
| 2     | 39.099    | 374127  | 3158   | 27.857  |
| 3     | 45.511    | 278739  | 1654   | 20.754  |
| 4     | 76.165    | 306649  | 1120   | 22.832  |
| Total |           | 1343043 | 9616   | 100.000 |

mV

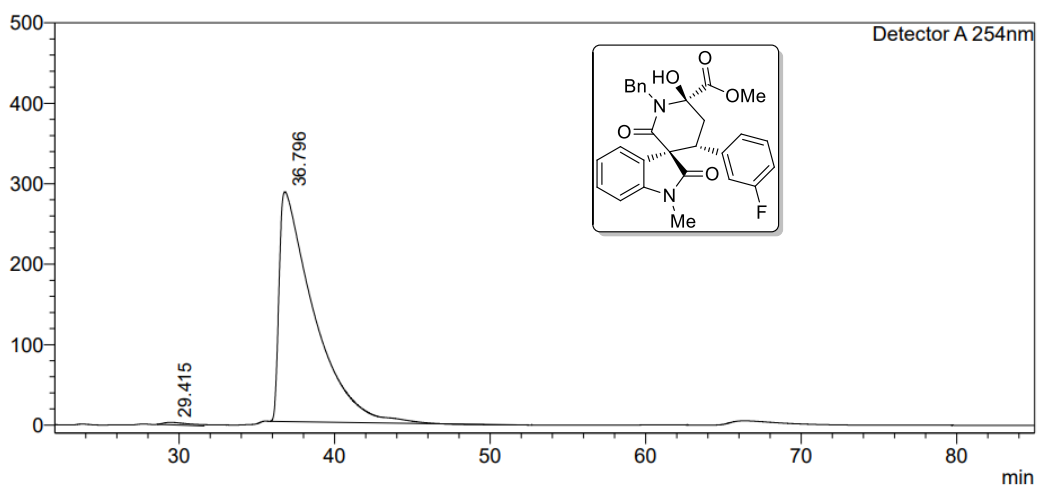

<Peak Table>

Detector A 254nm

| Peak# | Ret. Time | Area     | Height | Area%   |
|-------|-----------|----------|--------|---------|
| 1     | 29.415    | 378063   | 3023   | 0.849   |
| 2     | 36.796    | 44130210 | 285744 | 99.151  |
| Total |           | 44508273 | 288767 | 100.000 |



3cg:

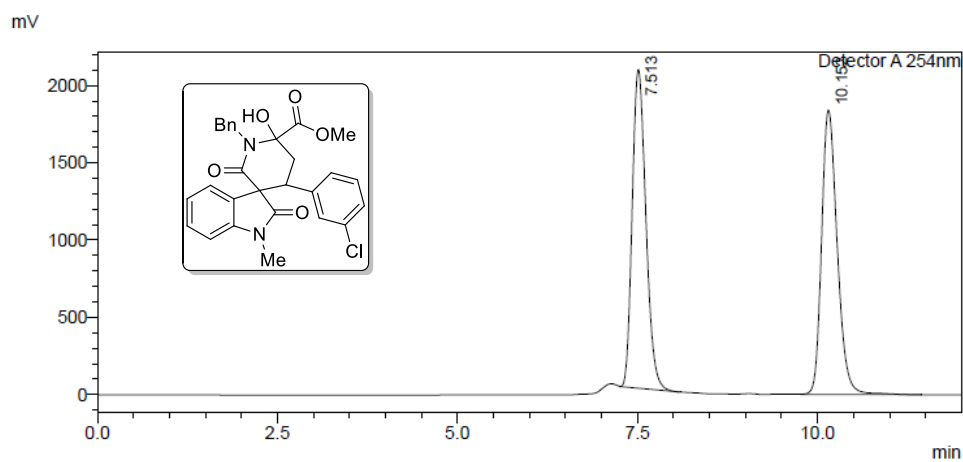

<Peak Table>

| Detector A 254nm |           |          |         |         |
|------------------|-----------|----------|---------|---------|
| Peak#            | Ret. Time | Area     | Height  | Area%   |
| 1                | 7.513     | 27209395 | 2058693 | 49.507  |
| 2                | 10.152    | 27751301 | 1838571 | 50.493  |
| Total            |           | 54960696 | 3897265 | 100.000 |

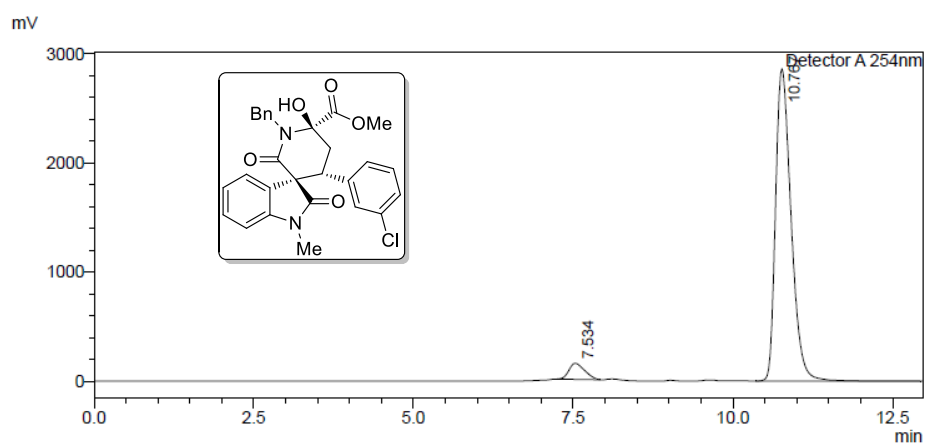

<Peak Table>

| Detector A 254nm |           |          |         |         |
|------------------|-----------|----------|---------|---------|
| Peak#            | Ret. Time | Area     | Height  | Area%   |
| 1                | 7.534     | 2546675  | 147845  | 5.010   |
| 2                | 10.767    | 48288364 | 2859295 | 94.990  |
| Total            |           | 50835038 | 3007141 | 100.000 |

3ch:

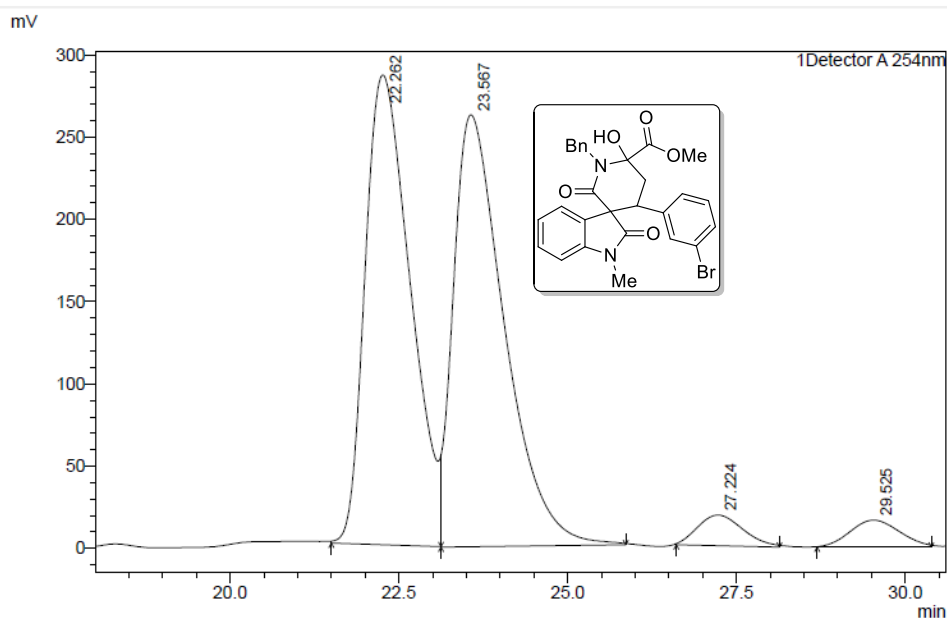

<Peak Table>

| Detector A 254nm |           |          |        |         |
|------------------|-----------|----------|--------|---------|
| Peak#            | Ret. Time | Area     | Height | Area%   |
| 1                | 22.262    | 13211657 | 285656 | 46.077  |
| 2                | 23.567    | 13758889 | 262602 | 47.985  |
| 3                | 27.224    | 868120   | 18612  | 3.028   |
| 4                | 29.525    | 834635   | 16337  | 2.911   |
| Total            |           | 28673301 | 583207 | 100.000 |

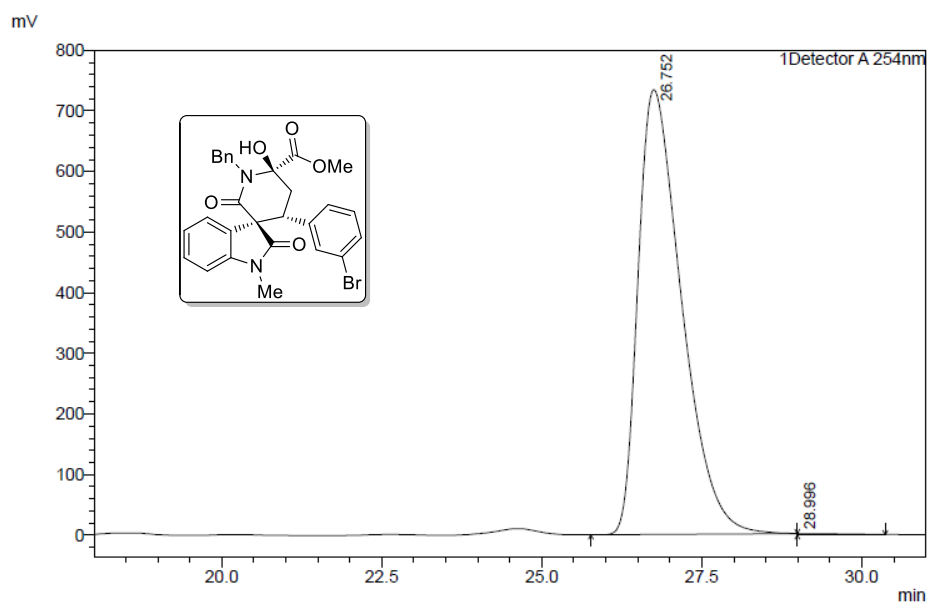

<Peak Table>

| Detector A 254nm |           |          |        |         |
|------------------|-----------|----------|--------|---------|
| Peak#            | Ret. Time | Area     | Height | Area%   |
| 1                | 26.752    | 34742312 | 733746 | 99.682  |
| 2                | 28.996    | 110856   | 2129   | 0.318   |
| Total            |           | 34853168 | 735875 | 100.000 |

3ci:

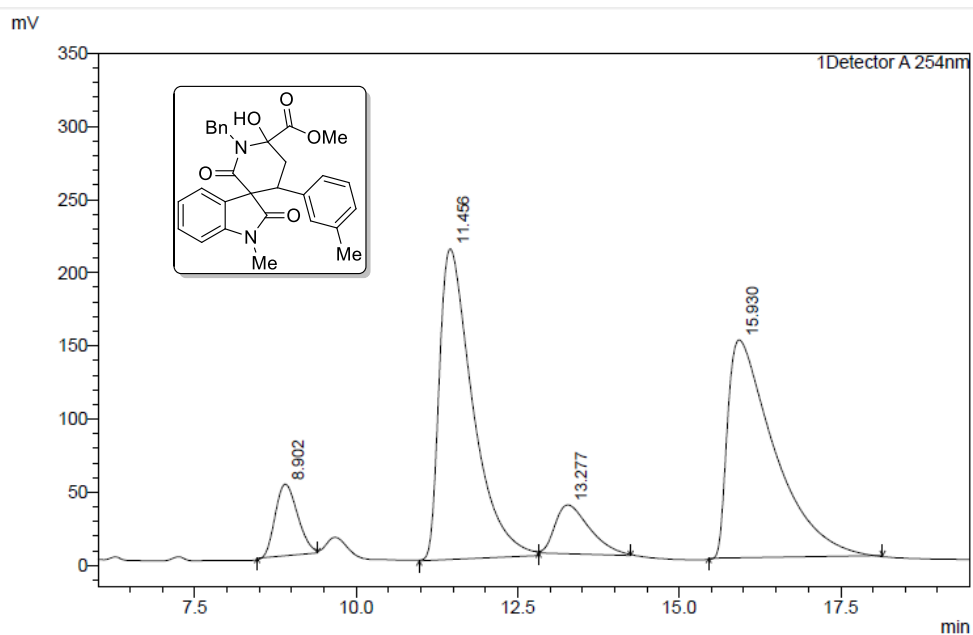

<Peak Table>

| Detector A 254nm |           |          |        |         |
|------------------|-----------|----------|--------|---------|
| Peak#            | Ret. Time | Area     | Height | Area%   |
| 1                | 8.902     | 1175611  | 48909  | 6.688   |
| 2                | 11.456    | 7640532  | 212223 | 43.464  |
| 3                | 13.277    | 1251899  | 33318  | 7.122   |
| 4                | 15.930    | 7510969  | 148785 | 42.727  |
| Total            |           | 17579011 | 443235 | 100.000 |

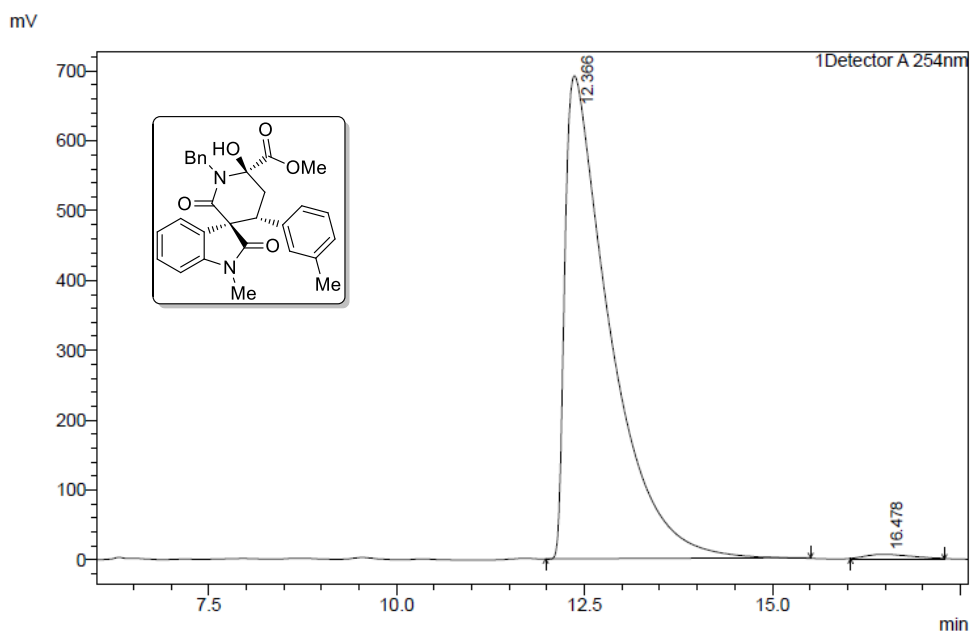

<Peak Table>

| Detector A 254nm |           |          |        |         |
|------------------|-----------|----------|--------|---------|
| Peak#            | Ret. Time | Area     | Height | Area%   |
| 1                | 12.366    | 28641600 | 691798 | 99.017  |
| 2                | 16.478    | 284436   | 6555   | 0.983   |
| Total            |           | 28926036 | 698353 | 100.000 |

3cj:

mV

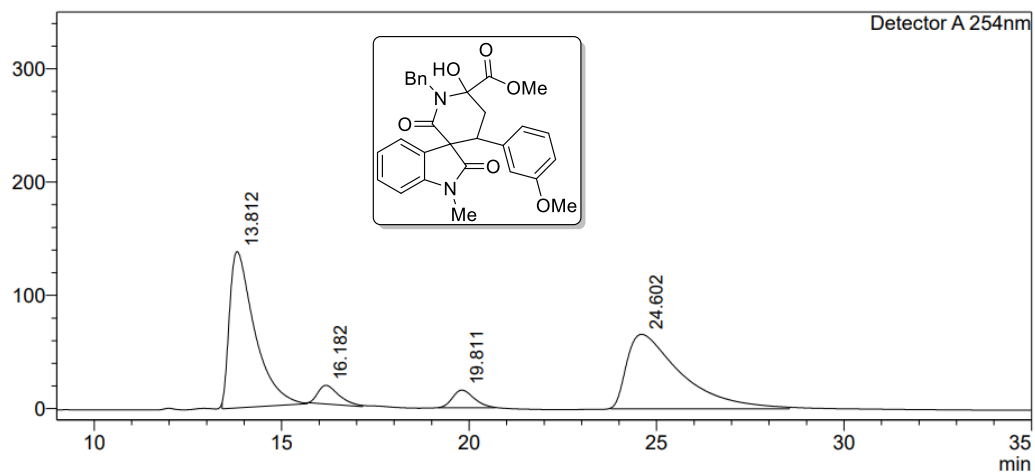

<Peak Table>

Detector A 254nm

| Peak# | Ret. Time | Area     | Height | Area%   |
|-------|-----------|----------|--------|---------|
| 1     | 13.812    | 6472617  | 138025 | 44.948  |
| 2     | 16.182    | 652915   | 16503  | 4.534   |
| 3     | 19.811    | 631294   | 15640  | 4.384   |
| 4     | 24.602    | 6643562  | 65749  | 46.135  |
| Total |           | 14400388 | 235917 | 100.000 |

mV

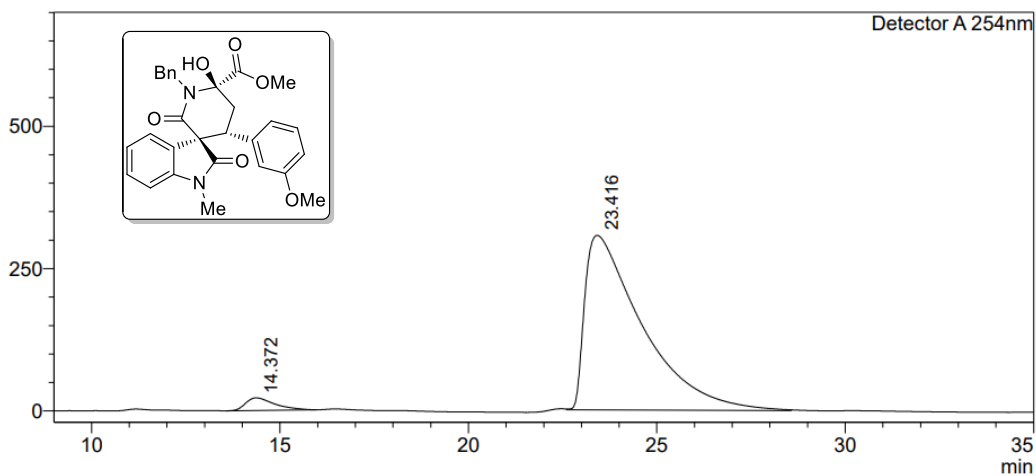

<Peak Table>

Detector A 254nm

| Peak# | Ret. Time | Area     | Height | Area%   |
|-------|-----------|----------|--------|---------|
| 1     | 14.372    | 1178301  | 22043  | 3.495   |
| 2     | 23.416    | 32531497 | 306667 | 96.505  |
| Total |           | 33709798 | 328710 | 100.000 |

3ck:

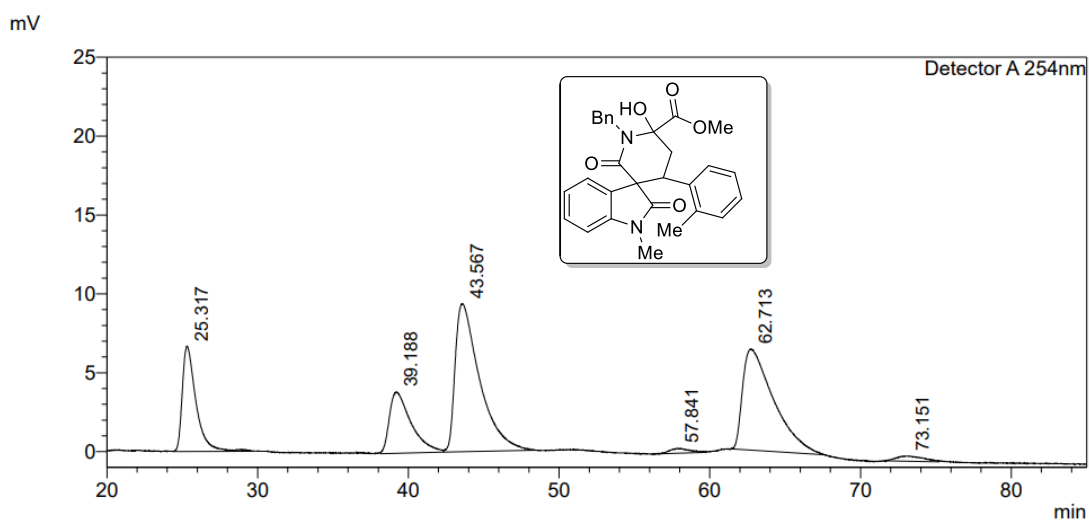

<Peak Table>

Detector A 254nm

| Peak# | Ret. Time | Area    | Height | Area%   |
|-------|-----------|---------|--------|---------|
| 1     | 25.317    | 418326  | 6672   | 14.646  |
| 2     | 39.188    | 387694  | 3879   | 13.574  |
| 3     | 43.567    | 1060782 | 9390   | 37.140  |
| 4     | 57.841    | 28600   | 316    | 1.001   |
| 5     | 62.713    | 919237  | 6410   | 32.184  |
| 6     | 73.151    | 41534   | 330    | 1.454   |
| Total |           | 2856174 | 26997  | 100.000 |

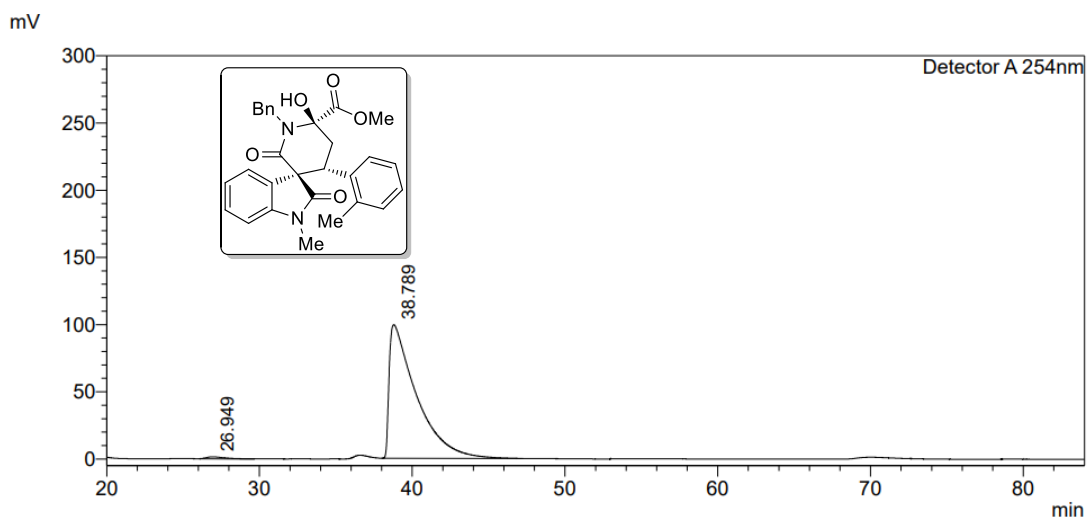

<Peak Table>

Detector A 254nm

| Peak# | Ret. Time | Area     | Height | Area%   |
|-------|-----------|----------|--------|---------|
| 1     | 26.949    | 121323   | 1456   | 0.974   |
| 2     | 38.789    | 12340406 | 99468  | 99.026  |
| Total |           | 12461728 | 100924 | 100.000 |

3cl:

mV

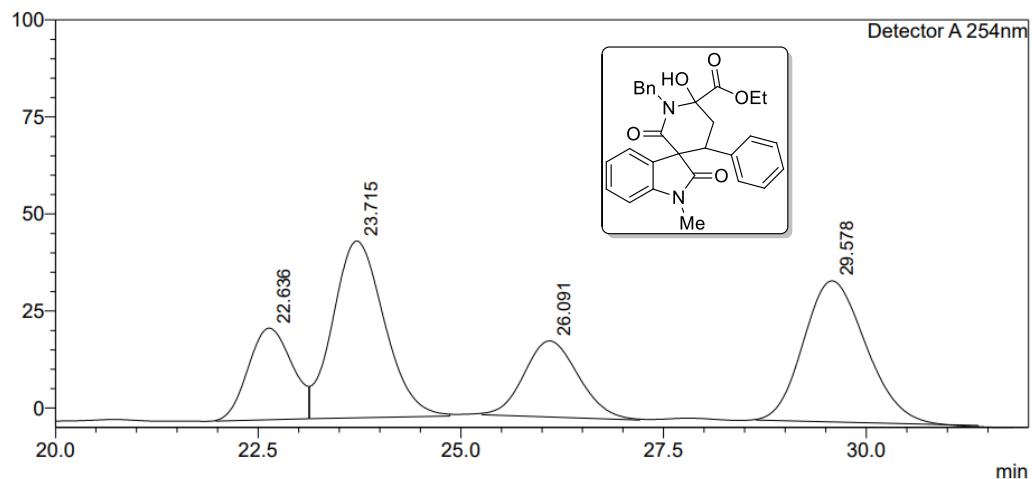

<Peak Table>

Detector A 254nm

| Peak# | Ret. Time | Area    | Height | Area%   |
|-------|-----------|---------|--------|---------|
| 1     | 22.636    | 893946  | 23613  | 15.494  |
| 2     | 23.715    | 2020190 | 45579  | 35.014  |
| 3     | 26.091    | 912645  | 19584  | 15.818  |
| 4     | 29.578    | 1942879 | 36314  | 33.674  |
| Total |           | 5769659 | 125091 | 100.000 |

mV

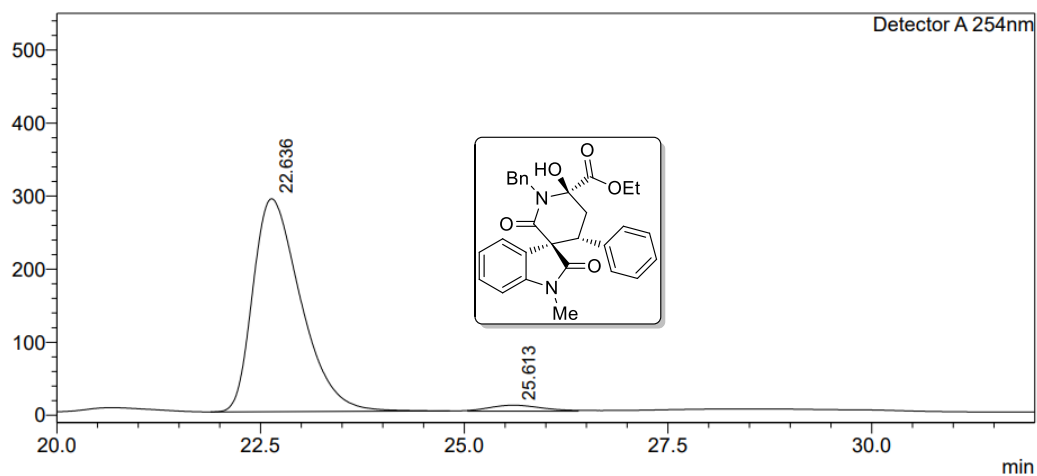

<Peak Table>

Detector A 254nm

| Peak# | Ret. Time | Area     | Height | Area%   |
|-------|-----------|----------|--------|---------|
| 1     | 22.636    | 11935092 | 291391 | 96.969  |
| 2     | 25.613    | 373026   | 8226   | 3.031   |
| Total |           | 12308117 | 299617 | 100.000 |

3cm:

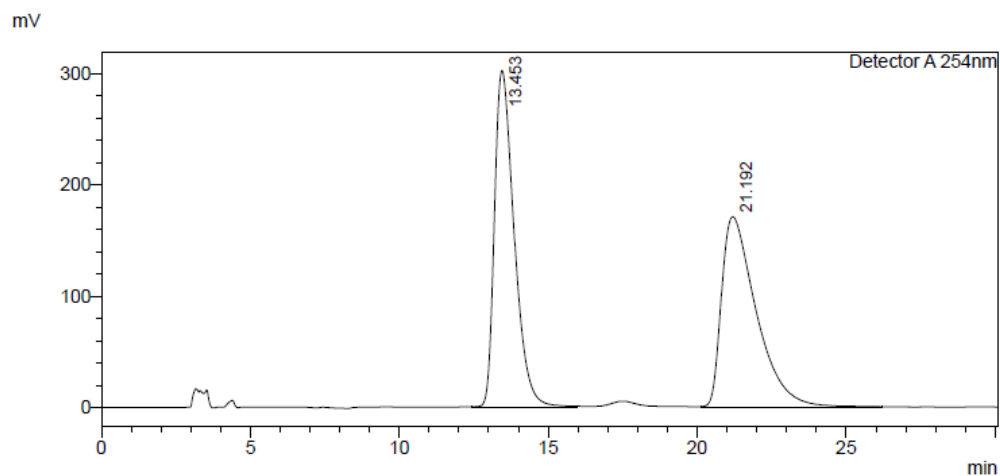

<Peak Table>

Detector A 254nm

| Peak# | Ret. Time | Area     | Height | Area%   |
|-------|-----------|----------|--------|---------|
| 1     | 13.453    | 13887586 | 302047 | 50.010  |
| 2     | 21.192    | 13882287 | 170868 | 49.990  |
| Total |           | 27769873 | 472915 | 100.000 |

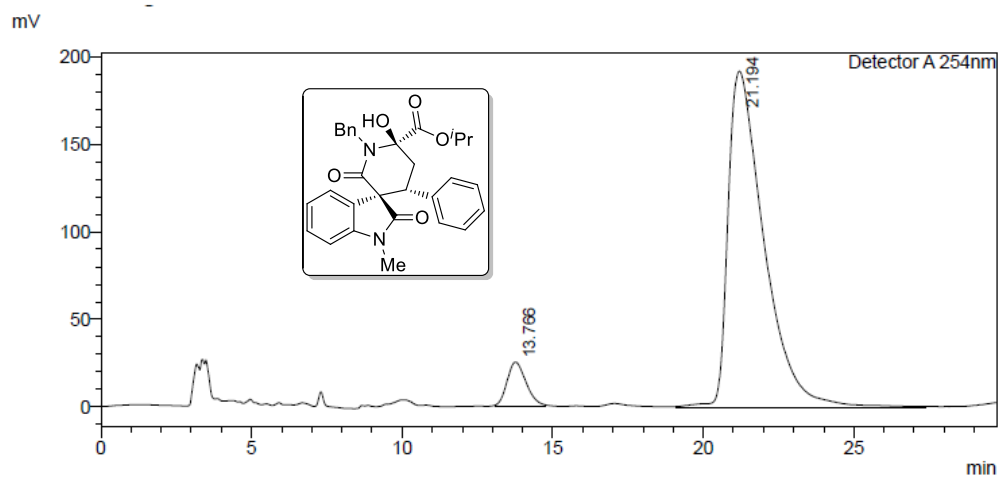

<Peak Table>

Detector A 254nm

| Peak# | Ret. Time | Area     | Height | Area%   |
|-------|-----------|----------|--------|---------|
| 1     | 13.766    | 1096206  | 25070  | 6.419   |
| 2     | 21.194    | 15981615 | 192199 | 93.581  |
| Total |           | 17077821 | 217268 | 100.000 |

4:

mV

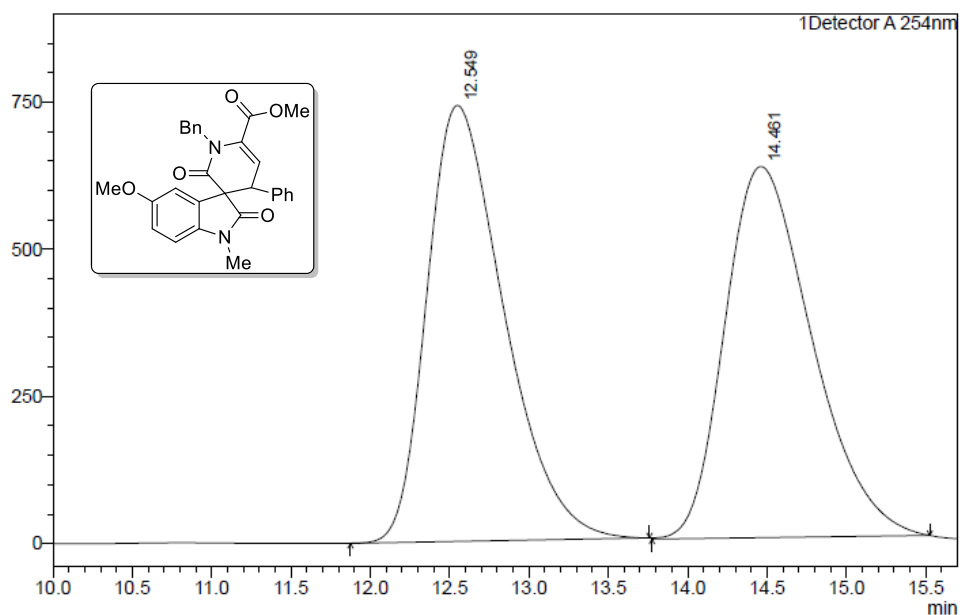

<Peak Table>

Detector A 254nm

| Peak# | Ret. Time | Area     | Height  | Area%   |
|-------|-----------|----------|---------|---------|
| 1     | 12.549    | 25282163 | 742498  | 50.609  |
| 2     | 14.461    | 24674099 | 635269  | 49.391  |
| Total |           | 49956262 | 1377768 | 100.000 |

mV

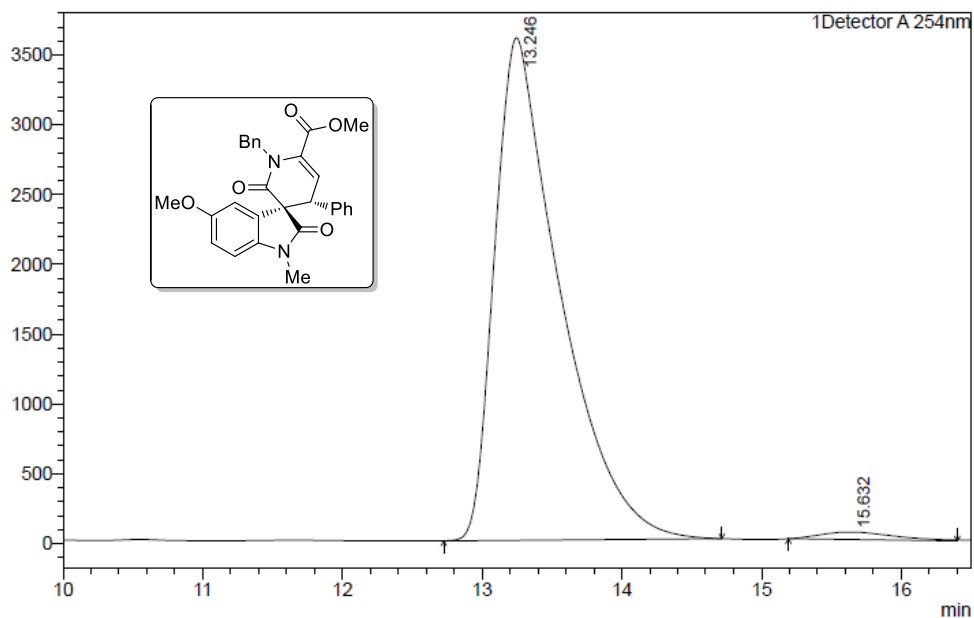

<Peak Table>

Detector A 254nm

| Peak# | Ret. Time | Area      | Height  | Area%   |
|-------|-----------|-----------|---------|---------|
| 1     | 13.246    | 116923684 | 3601457 | 98.331  |
| 2     | 15.632    | 1984605   | 53470   | 1.669   |
| Total |           | 118908290 | 3654927 | 100.000 |



5:

mV

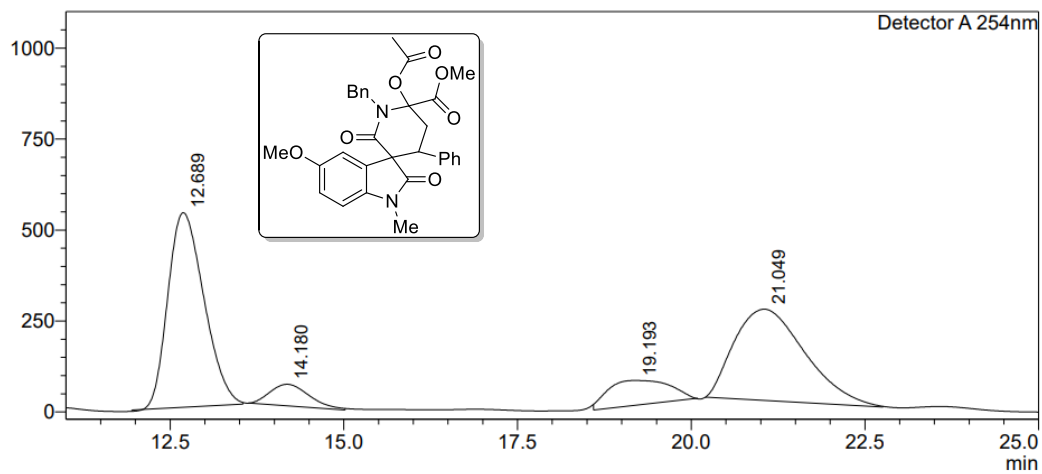

<Peak Table>

Detector A 254nm

| Peak# | Ret. Time | Area     | Height | Area%   |
|-------|-----------|----------|--------|---------|
| 1     | 12.689    | 19314050 | 534598 | 44.317  |
| 2     | 14.180    | 2330849  | 59224  | 5.348   |
| 3     | 19.193    | 4170095  | 67792  | 9.568   |
| 4     | 21.049    | 17766572 | 250728 | 40.766  |
| Total |           | 43581566 | 912342 | 100.000 |

mV

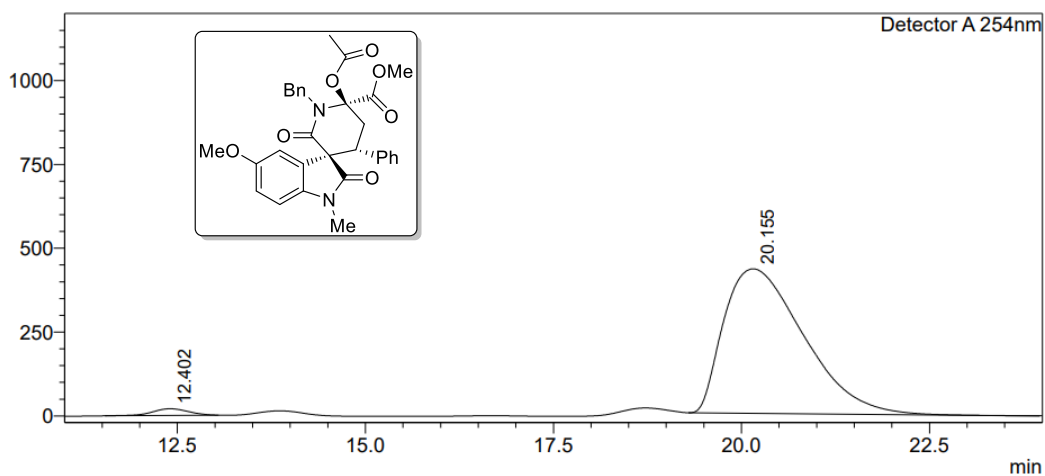

<Peak Table>

Detector A 254nm

| Peak# | Ret. Time | Area     | Height | Area%   |
|-------|-----------|----------|--------|---------|
| 1     | 12.402    | 679670   | 20242  | 2.082   |
| 2     | 20.155    | 31963694 | 431117 | 97.918  |
| Total |           | 32643364 | 451359 | 100.000 |

6:

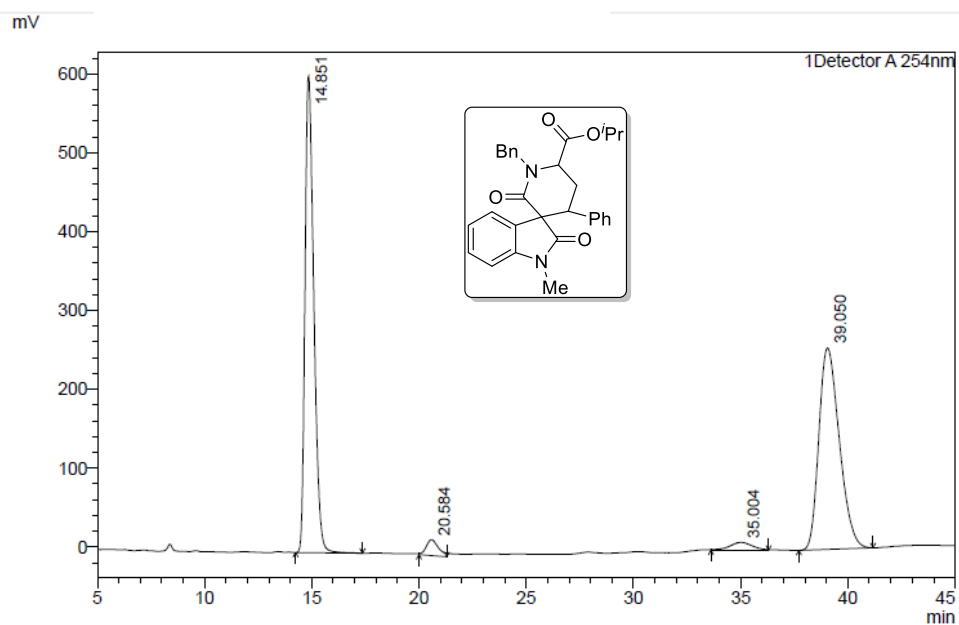

<Peak Table>

Detector A 254nm

| Peak# | Ret. Time | Area     | Height | Area%   |
|-------|-----------|----------|--------|---------|
| 1     | 14.851    | 17281534 | 604570 | 48.350  |
| 2     | 20.584    | 802095   | 20185  | 2.244   |
| 3     | 35.004    | 737510   | 9898   | 2.063   |
| 4     | 39.050    | 16921103 | 255483 | 47.342  |
| Total |           | 35742242 | 890135 | 100.000 |

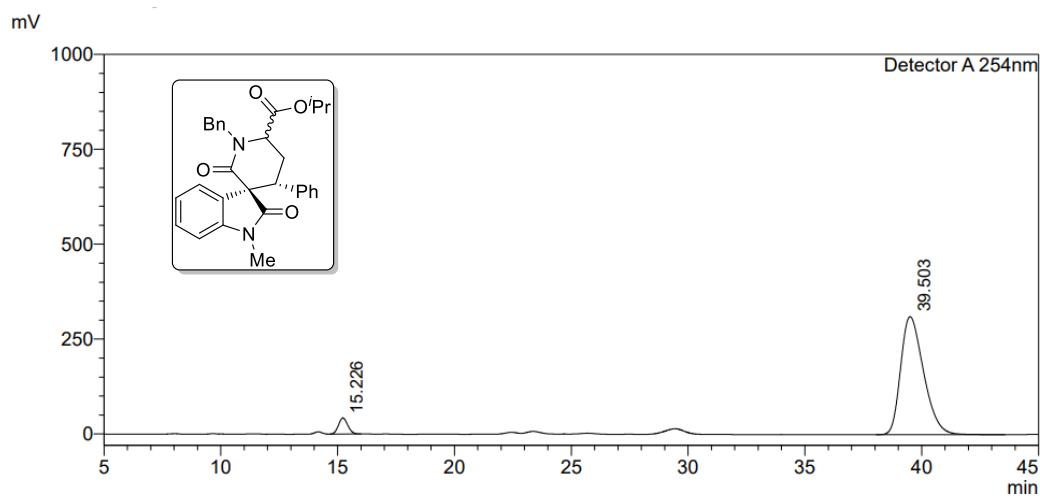

<Peak Table>

Detector A 254nm

| Peak# | Ret. Time | Area     | Height | Area%   |
|-------|-----------|----------|--------|---------|
| 1     | 15.226    | 1171588  | 42234  | 5.229   |
| 2     | 39.503    | 21235384 | 310945 | 94.771  |
| Total |           | 22406972 | 353179 | 100.000 |
